# Supplementary material for: Use of isotretinoin and risk of depression in patients with acne: a systematic review and meta-analysis
Source: PubMed Central journal article supplement — BMJ Open. 2019 Jan 21;9(1):e021549. doi: 10.1136/bmjopen-2018-021549 (PMC6347928; doi:10.1136/bmjopen-2018-021549), 2019-01-21
Supplement: bmjopen-2018-021549.draft_revisions.pdf [file bmjopen-2018-021549.draft_revisions.pdf]

# BMJ Open

BMJ Open is committed to open peer review. As part of this commitment we make the peer review history of every article we publish publicly available.

When an article is published we post the peer reviewers' comments and the authors' responses online. We also post the versions of the paper that were used during peer review. These are the versions that the peer review comments apply to.

The versions of the paper that follow are the versions that were submitted during the peer review process. They are not the versions of record or the final published versions. They should not be cited or distributed as the published version of this manuscript.

BMJ Open is an open access journal and the full, final, typeset and author-corrected version of record of the manuscript is available on our site with no access controls, subscription charges or pay-per-view fees (<http://bmjopen.bmj.com>).

If you have any questions on BMJ Open's open peer review process please email [info.bmjopen@bmj.com](mailto:info.bmjopen@bmj.com)

# BMJ Open

## Use of isotretinoin and risk of depression in patients with acne: a systematic review and meta-analysis

|                               |                                                                                                                                                                                                                                                                                                                                                                                                                                                                                                                                       |
|-------------------------------|---------------------------------------------------------------------------------------------------------------------------------------------------------------------------------------------------------------------------------------------------------------------------------------------------------------------------------------------------------------------------------------------------------------------------------------------------------------------------------------------------------------------------------------|
| Journal:                      | <i>BMJ Open</i>                                                                                                                                                                                                                                                                                                                                                                                                                                                                                                                       |
| Manuscript ID                 | bmjopen-2018-021549                                                                                                                                                                                                                                                                                                                                                                                                                                                                                                                   |
| Article Type:                 | Research                                                                                                                                                                                                                                                                                                                                                                                                                                                                                                                              |
| Date Submitted by the Author: | 09-Jan-2018                                                                                                                                                                                                                                                                                                                                                                                                                                                                                                                           |
| Complete List of Authors:     | Li, Changqiang ; the Affiliated Hospital of Southwest Medical University, Department of Dermatology<br>Chen, Jianmei ; the First Affiliated Hospital of Chongqing Medical University, Department of Psychiatry<br>Wang, Wo ; University-Town Hospital of Chongqing Medical University, Mental Health Center<br>Ai, Ming ; the First Affiliated Hospital of Chongqing Medical University, Department of Psychiatry<br>Zhang, Qi ; the First Affiliated Hospital of Chongqing Medical University, Department of Psychiatry<br>Kuang, Li |
| Keywords:                     | Acne < DERMATOLOGY, Depression & mood disorders < PSYCHIATRY, ORAL MEDICINE                                                                                                                                                                                                                                                                                                                                                                                                                                                           |
|                               |                                                                                                                                                                                                                                                                                                                                                                                                                                                                                                                                       |

SCHOLARONE™  
Manuscripts

1  
2  
3 **Use of isotretinoin and risk of depression in patients with acne: a systematic review and**  
4  
5  
6 **meta-analysis**  
7

8 Changqiang Li<sup>2</sup>, Jianmei Chen<sup>1</sup>, Wo Wang<sup>3</sup>, Ming Ai<sup>1</sup>, Qi Zhang<sup>1</sup>, Li Kuang<sup>1\*</sup>  
9

10  
11 <sup>1</sup>Department of Psychiatry, the First Affiliated Hospital of Chongqing Medical University,  
12  
13 Chongqing 400016, China  
14

15  
16 <sup>2</sup>Department of Dermatology, the Affiliated Hospital of Southwest Medical University,  
17  
18 Luzhou646000, China  
19

20  
21 <sup>3</sup>Mental Health Center, University-Town Hospital of Chongqing Medical University,  
22  
23 Chongqing 401331, China  
24  
25

26  
27  
28 **\*Corresponding author:**  
29

30 Li Kuang  
31

32  
33 Department of Psychiatry, the First Affiliated Hospital of Chongqing Medical University,  
34  
35 Chongqing 400016, China  
36

37  
38 Tel: +86-13908379733  
39

40  
41 Fax: +86-21-64085875  
42

43  
44 Email: kuangli0308@163.com  
45  
46

47  
48 **Running title:** isotretinoin and risk of depression in patients with acne  
49  
50  
51  
52  
53  
54  
55  
56  
57  
58

## ABSTRACT

**Objectives:** Oral isotretinoin is the first-line treatment of severe acne vulgaris, while isotretinoin may associate with depressive disorders risk. The purpose of this study was to investigate the association between the use of isotretinoin and risk of depression in patients with acne vulgaris.

**Design:** meta-analysis. The standardized mean difference (SMD) and the relative risk (RR) were used employed for data synthesis by using random-effects model. **Setting:** Studies were identified by electronic searches of PubMed, Embase, and the Cochrane Library up to December 2017.

**Participants:** acne patients.

**Interventions:** Studies comparing isotretinoin with other interventions in acne patients were included.

**Results:** Twenty studies were selected. The analysis of 17 studies showed that the use of isotretinoin was significantly associated with improved symptoms measured on the depression scales compared with the baseline before treatment [SMD = -0.33, 95% confidence interval(CI) -0.51 to -0.15,  $P < 0.05$ ;  $I^2 = 76.6\%$ ,  $P < 0.05$ ]. Four studies were related to the analysis of the risk of depression, and the pooled data indicated the use of isotretinoin was not associated with the risk of depressive disorders (RR = 1.15, 95% CI 0.60–2.21,  $P = 0.14$ ). Further, the risk of depressive disorders was increased when pooled retrospective studies (RR = 1.39, 95% CI 1.05–1.84,  $P = 0.02$ ), but the use of isotretinoin

1  
2  
3 has no significant effect on the risk of depressive disorders when pooled prospective studies  
4  
5  
6 (RR = 0.85, 95% CI 0.60–2.21,  $P = 0.86$ ).  
7

8 **Conclusions:** The findings of this study suggested acne patients received isotretinoin was  
9  
10 associated with significantly improved depression symptoms. However, it may play an  
11  
12 important role on the progression of depression. Future randomized controlled trials are  
13  
14 needed to verify the present findings.  
15  
16  
17  
18  
19  
20

### 21 **Strengths and limitations of this study**

- 22 1. Most included studies were prospectively designed, and the quality of included studies  
23  
24 was largely moderate to high.  
25  
26
- 27 2. The heterogeneity was explored by sensitivity, subgroup, and meta-regression analyses.  
28  
29
- 30 3. The small sample sizes of some included studies might have limited the statistical power  
31  
32 and increased the chance of missing small effects.  
33  
34
- 35 4. No RCT was available so far, which was a major drawback for studies on this topic.  
36  
37
- 38 5. The treatment duration, drug dose, and depression scale varied between different studies.  
39  
40  
41  
42  
43

44 **Keywords:** acne; depression; isotretinoin; meta-analysis  
45  
46  
47  
48  
49  
50  
51  
52  
53  
54  
55  
56  
57  
58  
59  
60

## INTRODUCTION

Acne vulgaris is a chronic inflammatory disease of the pilosebaceous unit of the face, neck, chest, and back <sup>1</sup>. As a pleomorphic skin disease, it may present as noninflammatory lesions (open and closed comedones) or inflammatory lesions (papules, pustules, or nodules) <sup>2</sup>. It is the most common skin disease around the world, with an estimated prevalence of 70%–87% <sup>3</sup>. The economic burden of acne was substantial. The cost is estimated to exceed \$1 billion per year in the United States for direct acne therapy, with \$100 million spent on various acne products <sup>4</sup>. Acne vulgaris may cause cosmetic defects and significantly impact on the quality of life <sup>5</sup>. It may provoke a wide range of mental problems, including depression, anxiety, poor self-esteem, social-phobia, and even suicide attempts <sup>6</sup>.

The optimal treatment approach is dependent on the morphology and severity of acne. Mild cases are suggested to be treated with topical retinoids. For moderate cases, systemic drugs are always needed, including oral antibiotics, hormonal therapy, and oral retinoids. However, for severe or resistant moderate acne, isotretinoin is the treatment of choice <sup>1,2,4,7</sup>. Isotretinoin is a vitamin A-derivative 13-*cis*-retinoic acid, which is the most effective therapy for acne to date. It targets all four processes during acne development, including normalization of follicular desquamation, reduction of sebaceous gland activity, inhibition of the proliferation of *Propionibacterium acnes*, and anti-inflammatory effects <sup>2,7,8</sup>. The meta-analysis suggested that isotretinoin cured around 85% of patients after an average treatment course of 4 months <sup>9</sup>.

1  
2  
3 Depressive disorders are highly prevalent in the Western world. The lifetime prevalence of  
4  
5  
6 major depressive disorders in the United States and Western Europe is around 13%–16%<sup>10</sup>.  
7  
8  
9 The frequency of depressive disorders during the use of isotretinoin varies from 1% to 11%  
10  
11<sup>11</sup>. Theoretically, effective treatment may lead to an improvement in depressive symptoms  
12  
13 of acne patients. However, the use of systemic isotretinoin itself may potentially increase  
14  
15 the risk of depression<sup>12</sup>. Experimental studies showed that isotretinoin could affect the  
16  
17 central nervous system and was involved in the pathogenesis of depression<sup>13</sup>. However,  
18  
19 some researchers disputed that the risk was extremely small and might be influenced by the  
20  
21 background risk or nondrug confounding factors<sup>12</sup>. The evidence for this controversy  
22  
23 remained incomplete and unclear. Therefore, this systematic review and meta-analysis was  
24  
25 performed to explore the association between the use of isotretinoin and risk of depression  
26  
27 among acne patients. Further, whether this relationship is differing in patients with specific  
28  
29 characteristics were also performed.  
30  
31  
32  
33  
34  
35  
36  
37  
38

## 39 **METHODS**

### 40 **Literature search**

41  
42 The Preferred Reporting Items for Systematic Reviews and Meta-Analyses guideline was  
43  
44 followed to conduct this meta-analysis<sup>14</sup>. A literature searches up to December 2017 was  
45  
46 performed, using PubMed, Embase, and the Cochrane Library. The following groups of  
47  
48 keywords were used in our search: (“depression” OR “depressive”) AND “acne” AND  
49  
50 “isotretinoin.” Also, the manual search of references listed in included studies and published  
51  
52  
53  
54  
55  
56  
57  
58  
59  
60

1  
2  
3 reviews were also performed to search for potentially eligible studies. The language was  
4  
5  
6 restricted to English.  
7

### 8 9 **Selection criteria**

10  
11 Studies were included if they fulfilled the following criteria: (1) being randomized  
12  
13 controlled trial (RCT), prospective or retrospective study, nested case-control study, or  
14  
15 population-based case-control study; (2) comparing the outcomes before and after the use  
16  
17 of isotretinoin in acne patients; or comparing isotretinoin with other treatment regimens in  
18  
19 patients with acne; (3) presenting the change in depressive symptoms measured by a  
20  
21 continuous depression scale<sup>15</sup>; or reporting the number of depressive patients before and  
22  
23 after the use of isotretinoin; or directly presenting the relative risk (RR), odds ratio (OR), or  
24  
25 hazard ratio (HR) between the use of isotretinoin and risk of depression.  
26  
27  
28  
29  
30

### 31 32 **Data extraction and quality assessment**

33  
34 Two authors independently assessed the titles and abstracts for eligibility and extracted data  
35  
36 in standardized electronic tables. The following data were extracted from included studies:  
37  
38 publication year, author, study design, sample size, participant sex and age, severity of acne,  
39  
40 compared groups, dose and duration of isotretinoin, and depression assessment tool. The  
41  
42 quality of included studies was assessed by the 9-star Newcastle-Ottawa Scale. This scale  
43  
44 evaluated the study quality based on three parameters: selection, comparability, and  
45  
46 exposure (case-control study) or outcome (cohort study). A maximum of 4 points was  
47  
48 assigned for the item of selection, 2 points for comparability, and 3 points for  
49  
50  
51  
52  
53  
54  
55  
56  
57  
58  
59  
60



1  
2  
3 exposure/outcome <sup>16</sup>. Studies were deemed as high quality for a score of 8–9, moderate  
4  
5 quality for a score of 6–7, and low quality for a score  $\leq 5$ .  
6  
7

### 8 **Statistical analysis**

10  
11 The continuous outcome of interest was the alteration in depressive symptoms assessed by a  
12  
13 continuous depression scale after the use of isotretinoin. For the continuous parameter of  
14  
15 depression score, the mean and standard difference (SD) of the score was extracted. The  
16  
17 standard mean difference (SMD) was used as the outcome measure. The SMD was a  
18  
19 unitless effect size estimate, which was the mean difference in the depression score between  
20  
21 the compared groups divided by the pooled SD of the distribution of the score used in the  
22  
23 study. The conversion of median (range/ interquartile range) to mean  $\pm$  SD was done by a  
24  
25 previously proposed method <sup>17</sup>. The binary outcome of interest was the number of  
26  
27 participants whose conditions were regarded as depression. RR and its corresponding 95%  
28  
29 confidential interval (CI) were used as the outcome measure. HR was regarded as  
30  
31 equivalent to RR in cohort studies. Given the overall low incidence of depression among the  
32  
33 general population, OR was assumed to be an accurate estimate of RR. It was preferred to  
34  
35 use the effect measures that reflected the greatest degree control for confounding factors.  
36  
37 Both adjusted and crude data were analyzed. When data on different subgroups were  
38  
39 reported by the same cohort, they were first pooled by the fixed-effects model. As the  
40  
41 random-effects model was more robust than the fixed-effects model, the DerSimonian–  
42  
43 Laird random-effects model was used to calculate the overall effect estimates for the  
44  
45 association between the use of isotretinoin and risk of depression <sup>18</sup>. The heterogeneity was  
46  
47  
48  
49  
50  
51  
52  
53  
54  
55  
56  
57  
58  
59  
60

1  
2  
3 evaluated by the Cochrane Q test and the  $I^2$  statistic. Heterogeneity was considered low,  
4 moderate, or high for  $I^2 < 25\%$ ,  $25\% - 50\%$ , and  $> 50\%$ , respectively<sup>19,20</sup>. Subgroup analyses  
5  
6 were conducted based on the following confounders: region, study design, sample size,  
7  
8 female percentage, and depression scale. Furthermore, meta-regression analyses were  
9  
10 performed for the continuous confounders of sample size and female percentage. A  
11  
12 sensitivity analysis was conducted by excluding a single study at a time. Also, a sensitivity  
13  
14 analysis was conducted using the weighted mean difference (WMD) as the effect estimate  
15  
16 for studies employing the same depression symptom scale. The publication bias was  
17  
18 visually assessed by the construction of funnel plot and statistically assessed by the Begg  
19  
20 and Egger regression asymmetry tests<sup>21,22</sup>. All statistical analyses were conducted using the  
21  
22 software Stata 12.0 (StataCorp, TX, USA). A *P* value less than 0.05 was considered  
23  
24 statistically significant.  
25  
26  
27  
28  
29  
30  
31  
32  
33  
34  
35  
36

## 37 RESULTS

### 38 Study selection

39  
40 A total of 632 records were retrieved from the electronic search, including 145 studies from  
41  
42 PubMed, 469 records from Embase, and 18 records from the Cochrane Library. After  
43  
44 screened by titles and abstracts. Five hundred and seventy-one were excluded with the  
45  
46 following reasons: reviews, editorials, case reports, or irrelevant studies, leaving 61 studies  
47  
48 for full-text review. Nine cross-sectional studies, 19 studies without sufficient data, and 13  
49  
50 studies were review, editorial, or comments were excluded. Finally, 20 studies were pooled  
51  
52  
53  
54  
55  
56  
57  
58  
59  
60

1  
2  
3 into the meta-analysis<sup>23-43</sup>. A flow diagram of the study selection process is depicted in  
4  
5  
6 Figure. 1.  
7

### 8 **Study characteristics**

9  
10 The characteristics of the included 20 studies are shown in Table 1. Jick et al. reported two  
11  
12 independent cohorts<sup>24</sup>, which were analyzed separately. Except for two retrospective  
13  
14 studies identifying depressive patients by the International Classification of Diseases code<sup>24</sup>,  
15  
16  
17  
18  
19  
20  
21  
22  
23  
24  
25  
26  
27  
28  
29  
30  
31  
32  
33  
34  
35  
36  
37  
38  
39  
40  
41  
42  
43  
44  
45  
46  
47  
48  
49  
50  
51  
52  
53  
54  
55  
56  
57  
58  
59  
60  
61  
62  
63  
64  
65  
66  
67  
68  
69  
70  
71  
72  
73  
74  
75  
76  
77  
78  
79  
80  
81  
82  
83  
84  
85  
86  
87  
88  
89  
90  
91  
92  
93  
94  
95  
96  
97  
98  
99  
100  
101  
102  
103  
104  
105  
106  
107  
108  
109  
110  
111  
112  
113  
114  
115  
116  
117  
118  
119  
120  
121  
122  
123  
124  
125  
126  
127  
128  
129  
130  
131  
132  
133  
134  
135  
136  
137  
138  
139  
140  
141  
142  
143  
144  
145  
146  
147  
148  
149  
150  
151  
152  
153  
154  
155  
156  
157  
158  
159  
160  
161  
162  
163  
164  
165  
166  
167  
168  
169  
170  
171  
172  
173  
174  
175  
176  
177  
178  
179  
180  
181  
182  
183  
184  
185  
186  
187  
188  
189  
190  
191  
192  
193  
194  
195  
196  
197  
198  
199  
200  
201  
202  
203  
204  
205  
206  
207  
208  
209  
210  
211  
212  
213  
214  
215  
216  
217  
218  
219  
220  
221  
222  
223  
224  
225  
226  
227  
228  
229  
230  
231  
232  
233  
234  
235  
236  
237  
238  
239  
240  
241  
242  
243  
244  
245  
246  
247  
248  
249  
250  
251  
252  
253  
254  
255  
256  
257  
258  
259  
260  
261  
262  
263  
264  
265  
266  
267  
268  
269  
270  
271  
272  
273  
274  
275  
276  
277  
278  
279  
280  
281  
282  
283  
284  
285  
286  
287  
288  
289  
290  
291  
292  
293  
294  
295  
296  
297  
298  
299  
300  
301  
302  
303  
304  
305  
306  
307  
308  
309  
310  
311  
312  
313  
314  
315  
316  
317  
318  
319  
320  
321  
322  
323  
324  
325  
326  
327  
328  
329  
330  
331  
332  
333  
334  
335  
336  
337  
338  
339  
340  
341  
342  
343  
344  
345  
346  
347  
348  
349  
350  
351  
352  
353  
354  
355  
356  
357  
358  
359  
360  
361  
362  
363  
364  
365  
366  
367  
368  
369  
370  
371  
372  
373  
374  
375  
376  
377  
378  
379  
380  
381  
382  
383  
384  
385  
386  
387  
388  
389  
390  
391  
392  
393  
394  
395  
396  
397  
398  
399  
400  
401  
402  
403  
404  
405  
406  
407  
408  
409  
410  
411  
412  
413  
414  
415  
416  
417  
418  
419  
420  
421  
422  
423  
424  
425  
426  
427  
428  
429  
430  
431  
432  
433  
434  
435  
436  
437  
438  
439  
440  
441  
442  
443  
444  
445  
446  
447  
448  
449  
450  
451  
452  
453  
454  
455  
456  
457  
458  
459  
460  
461  
462  
463  
464  
465  
466  
467  
468  
469  
470  
471  
472  
473  
474  
475  
476  
477  
478  
479  
480  
481  
482  
483  
484  
485  
486  
487  
488  
489  
490  
491  
492  
493  
494  
495  
496  
497  
498  
499  
500  
501  
502  
503  
504  
505  
506  
507  
508  
509  
510  
511  
512  
513  
514  
515  
516  
517  
518  
519  
520  
521  
522  
523  
524  
525  
526  
527  
528  
529  
530  
531  
532  
533  
534  
535  
536  
537  
538  
539  
540  
541  
542  
543  
544  
545  
546  
547  
548  
549  
550  
551  
552  
553  
554  
555  
556  
557  
558  
559  
560  
561  
562  
563  
564  
565  
566  
567  
568  
569  
570  
571  
572  
573  
574  
575  
576  
577  
578  
579  
580  
581  
582  
583  
584  
585  
586  
587  
588  
589  
590  
591  
592  
593  
594  
595  
596  
597  
598  
599  
600  
601  
602  
603  
604  
605  
606  
607  
608  
609  
610  
611  
612  
613  
614  
615  
616  
617  
618  
619  
620  
621  
622  
623  
624  
625  
626  
627  
628  
629  
630  
631  
632  
633  
634  
635  
636  
637  
638  
639  
640  
641  
642  
643  
644  
645  
646  
647  
648  
649  
650  
651  
652  
653  
654  
655  
656  
657  
658  
659  
660  
661  
662  
663  
664  
665  
666  
667  
668  
669  
670  
671  
672  
673  
674  
675  
676  
677  
678  
679  
680  
681  
682  
683  
684  
685  
686  
687  
688  
689  
690  
691  
692  
693  
694  
695  
696  
697  
698  
699  
700  
701  
702  
703  
704  
705  
706  
707  
708  
709  
710  
711  
712  
713  
714  
715  
716  
717  
718  
719  
720  
721  
722  
723  
724  
725  
726  
727  
728  
729  
730  
731  
732  
733  
734  
735  
736  
737  
738  
739  
740  
741  
742  
743  
744  
745  
746  
747  
748  
749  
750  
751  
752  
753  
754  
755  
756  
757  
758  
759  
760  
761  
762  
763  
764  
765  
766  
767  
768  
769  
770  
771  
772  
773  
774  
775  
776  
777  
778  
779  
780  
781  
782  
783  
784  
785  
786  
787  
788  
789  
790  
791  
792  
793  
794  
795  
796  
797  
798  
799  
800  
801  
802  
803  
804  
805  
806  
807  
808  
809  
810  
811  
812  
813  
814  
815  
816  
817  
818  
819  
820  
821  
822  
823  
824  
825  
826  
827  
828  
829  
830  
831  
832  
833  
834  
835  
836  
837  
838  
839  
840  
841  
842  
843  
844  
845  
846  
847  
848  
849  
850  
851  
852  
853  
854  
855  
856  
857  
858  
859  
860  
861  
862  
863  
864  
865  
866  
867  
868  
869  
870  
871  
872  
873  
874  
875  
876  
877  
878  
879  
880  
881  
882  
883  
884  
885  
886  
887  
888  
889  
890  
891  
892  
893  
894  
895  
896  
897  
898  
899  
900  
901  
902  
903  
904  
905  
906  
907  
908  
909  
910  
911  
912  
913  
914  
915  
916  
917  
918  
919  
920  
921  
922  
923  
924  
925  
926  
927  
928  
929  
930  
931  
932  
933  
934  
935  
936  
937  
938  
939  
940  
941  
942  
943  
944  
945  
946  
947  
948  
949  
950  
951  
952  
953  
954  
955  
956  
957  
958  
959  
960  
961  
962  
963  
964  
965  
966  
967  
968  
969  
970  
971  
972  
973  
974  
975  
976  
977  
978  
979  
980  
981  
982  
983  
984  
985  
986  
987  
988  
989  
990  
991  
992  
993  
994  
995  
996  
997  
998  
999  
1000

1  
2  
3 moderate and severe acne<sup>35</sup>. Fakour et al. showed data for males and females separately<sup>37</sup>.  
4  
5  
6 Kaymak et al. reported depression scores measured by Beck Depression Inventory (BDI)  
7  
8 and hospital anxiety and depression scale-depression (HADS-D) scales<sup>33</sup>. These subgroup  
9  
10 data were all pooled into the overall analysis. Compared with the baseline condition before  
11  
12 therapy, the use of isotretinoin was associated with significant improvement in depressive  
13  
14 symptoms (SMD = -0.33, 95% CI -0.51 to -0.15,  $P < 0.05$ ) (Figure. 2). Highly significant  
15  
16 heterogeneity was revealed ( $I^2 = 76.6\%$ ,  $P < 0.05$ ).  
17  
18

19  
20  
21 In the sensitivity analysis, the overall effect was not substantially altered when excluding  
22  
23 any single study. In the meta-regression analysis, the number of included participants ( $P =$   
24  
25 0.995) and the female proportion ( $P = 0.56$ ) did not account for the source of heterogeneity.  
26  
27

28  
29 Data on subgroup analyses are shown in Table 2. The pooled effect estimate remained  
30  
31 significant for 14 European studies (SMD = -0.35, 95% CI -0.51 to -0.19,  $P < 0.05$ ), with  
32  
33 moderate heterogeneity ( $I^2 = 46.3\%$ ). However, the analysis of three Asian studies did not  
34  
35 show significant result (SMD = -0.18, 95% CI -0.81 to 0.45,  $P = 0.57$ ;  $I^2 = 94.4\%$ ). Only 1  
36  
37 study conducted in North America and Africa, respectively. We noted the use of isotretinoin  
38  
39 has no significant effect on depressive symptoms in North America (SMD = -0.23, 95%CI  
40  
41 -0.59 to 0.13;  $P = 0.21$ ), while it could improve depressive symptoms in Africa (SMD =  
42  
43 -0.74, 95%CI -1.22 to -0.26,  $P < 0.05$ ). The pooled results remained significant for studies  
44  
45 using HADS-D (SMD = -0.57, 95% CI -0.83 to -0.31,  $P < 0.25$ ;  $I^2 = 27.2\%$ ), and those  
46  
47 using the Center for Epidemiological Studies Depression scale (CES-D) (SMD = -0.27, 95%  
48  
49 CI -0.52 to -0.02,  $P < 0.05$ ;  $I^2 = 0\%$ ). However, the pooled effect turned to be  
50  
51  
52  
53  
54  
55  
56  
57  
58  
59  
60

1  
2  
3  
4 non-significant for studies using the BDI scale (SMD = -0.15, 95% CI -0.36 to 0.06,  $P =$   
5  
6 0.17;  $I^2 = 62.4\%$ ) and those using the Hamilton Rating Scale (HRS) (SMD = -0.55, 95% CI  
7  
8 -1.56 to 0.46,  $P = 0.29$ ;  $I^2 = 96.6\%$ ). The pooled effects were significant for both studies of  
9  
10 smaller sample size (SMD = -0.38, 95% CI -0.65 to -0.12,  $P < 0.05$ ) and those with larger  
11  
12 sample size (SMD = -0.29, 95% CI -0.54 to -0.04,  $P < 0.05$ ). Results for different  
13  
14 proportions of females did not show a significant difference. The funnel plot appeared to be  
15  
16 symmetrical (Figure. 3). No publication bias was revealed by the Egger's test ( $P = 0.76$ ) or  
17  
18 by the Begg test ( $P = 0.87$ ).

19  
20  
21 Also, the sensitivity analysis was performed by pooling the WMD for studies using the  
22  
23 same scale. The pooled results were non-significant for studies using the BDI scale (WMD  
24  
25 = -0.84, 95% CI -2.05 to 0.38,  $P = 0.18$ ;  $I^2 = 62.2\%$ ,  $P < 0.05$ ) (Figure. 4), and those using  
26  
27 HRS (WMD = -1.91, 95% CI -5.44 to 1.63,  $P = 0.29$ ;  $I^2 = 97.3\%$ ,  $P < 0.05$ ). In contrast, the  
28  
29 pooled WMDs were significant for studies using HADS-D (WMD = -2.06, 95% CI -3.42  
30  
31 to -0.70,  $P < 0.05$ ;  $I^2 = 66.0\%$ ,  $P < 0.05$ ), studies using CES-D (WMD = -1.88, 95% CI  
32  
33 -3.64 to -0.11,  $P < 0.05$ ;  $I^2 = 0\%$ ,  $P = 0.63$ ).

### 41 42 **Use of Isotretinoin and risk of depression**

43  
44 Two retrospective studies showed the adjusted RR for the association between the use of  
45  
46 isotretinoin and risk of depression<sup>24, 31</sup>. Jick et al. presented data for two independent  
47  
48 cohorts. The overall result of three cohorts showed that the use of isotretinoin was  
49  
50 associated with an increased risk of depression (RR = 1.39, 95% CI 1.05–1.84,  $P = 0.02$ ;  
51  
52 Figure. 5), and no significant heterogeneity was shown ( $I^2 = 0.0\%$ ,  $P = 0.50$ ). However,  
53  
54  
55  
56  
57  
58  
59  
60

1  
2  
3  
4 there was no significant difference for the relationship between isotretinoin use and the risk  
5  
6 of depression when pooled two prospective studies (RR = 0.85, 95% CI 0.60–2.21,  $P = 0.86$ ;  
7  
8 Figure. 5), and substantial heterogeneity was observed ( $I^2 = 61.4\%$ ,  $P = 0.11$ ). The funnel  
9  
10 plot appeared to be symmetrical (Figure. 6), and the Egger's test ( $P = 0.76$ ) or the Begg test  
11  
12 ( $P = 1.00$ ) suggested no evidence of potential publication bias.  
13  
14  
15

## 16 17 18 19 **DISCUSSION**

20  
21 The risk of depression associated with the use of isotretinoin in patients with acne has been  
22  
23 a major concern for a long time. Previous data showed conflicting and inconsistent results.  
24  
25 Two previous systematic reviews on similar topic were detected<sup>13, 44</sup>. Although  
26  
27 comprehensive scenarios were presented, they failed in conducting data synthesis to obtain  
28  
29 pooled results. This meta-analysis that assessed the association between the use of  
30  
31 isotretinoin and risk of depression. It had several strengths as follows. A comprehensive  
32  
33 database search of worldwide cohorts was conducted, enrolling a large number of  
34  
35 participants. The quality of included studies was largely moderate to high. Most included  
36  
37 studies were prospectively designed. The association was investigated in several aspects.  
38  
39 The heterogeneity was explored by sensitivity, subgroup, and meta-regression analyses. The  
40  
41 present findings showed that isotretinoin was beneficial rather than harmful for the  
42  
43 improvement in depressive symptoms for acne patients (SMD =  $-0.33$ ,  $P < 0.05$ ). When  
44  
45 employing WMD as the effect estimate to assess studies using the same depression scale,  
46  
47 the benefit remained marked for studies using HADS-D and CES-D. Although no  
48  
49  
50  
51  
52  
53  
54  
55  
56  
57  
58  
59  
60

1  
2  
3 statistically significant data were shown for studies of BDI scale or HRS, the pooled WMD  
4  
5  
6 was in favor of patients after the use of isotretinoin. In risk assessment, the summary RR  
7  
8 showed that the use of isotretinoin increased the risk of depression for patients with acne  
9  
10  
11 when pooled retrospective studies, while this increased risk was not observed in prospective  
12  
13  
14 studies.

15  
16 Vallerand conducted a systematic review based on 11 trials to evaluate the efficacy and safety  
17  
18 of oral isotretinoin for acne, they point oral isotretinoin significantly reduced acne lesion  
19  
20 counts, while greater number of psychiatric adverse events (Depressed mood, fatigue,  
21  
22 hallucination, insomnia, lethargy) was found (32 versus 19). However, this study was not  
23  
24 provided the result by data synthesis<sup>45</sup>. Further, Huang et al conducted a meta-analysis based  
25  
26 on 31 studies and suggested the use of isotretinoin was not affected the incidence of  
27  
28 depression. Further, they point out the treatment of acne could ameliorate depressive  
29  
30 symptoms. However, the study summary the investigated outcomes just stratified by  
31  
32 depression assessment tool, whether these relationships are differing according to region,  
33  
34 study design, sample size, and female percentage were not illustrated<sup>46</sup>. We therefore  
35  
36 conducted this comprehensive, quantitative synthesis based on available studies to evaluate  
37  
38 any potential impact of the use of isotretinoin on the outcomes of depression incidence and  
39  
40 change in the depression score.  
41  
42  
43  
44  
45  
46  
47  
48

49 The concern for negative mood may arise from a series of experimental studies. Oral  
50  
51 isotretinoin significantly suppressed cell division in the hippocampus and severely disrupted  
52  
53 the learning capacity of mice<sup>47</sup>. Bremner et al. found that isotretinoin, but not antibiotics,  
54  
55  
56  
57  
58  
59  
60

1  
2  
3  
4 was associated with decreased brain metabolism in the orbitofrontal cortex, which was  
5  
6 known to mediate depression symptoms<sup>48</sup>. O'Reilly et al. proved that isotretinoin altered  
7  
8 intracellular serotonin, increased 5-HT1A receptor, and serotonin reuptake transporter  
9  
10 levels *in vitro*<sup>49</sup>. Thus, theoretically, isotretinoin itself may cause depressive disorders.  
11  
12 However, the potentially increased risk of depression could be compensated by the  
13  
14 treatment effects of isotretinoin for acne patients. Most acne patients were worried about  
15  
16 their appearances, which might lead to a series of psychological disorders. It was inferred  
17  
18 that the improvement in depression symptoms after the use of isotretinoin might be  
19  
20 attributed to the treatment success. Also, isotretinoin had a gradual effect on mood over  
21  
22 time, which was not an acute event<sup>50</sup>.

23  
24  
25  
26  
27  
28  
29 Of note, the controversy over this topic was complicated by various confounding  
30  
31 psychosocial and clinical factors. Aktan et al. suggested that adolescent girls were more  
32  
33 vulnerable compared with boys to the negative psychological effects of acne<sup>51</sup>. Women  
34  
35 with acne were significantly more embarrassed compared with males about their skin  
36  
37 disease. A large database study showed that female gender and acne could jointly increase  
38  
39 the risk of depression<sup>52</sup>. However, the role of gender was not revealed in meta-regression  
40  
41 and subgroup analyses. Acne itself can exert different impacts on individual patients. The  
42  
43 lack of knowledge, especially about prognosis, may be a source of depression<sup>24, 53</sup>.  
44  
45 Approximately one-fifth of acne patients suffered from psychiatric disorders<sup>33</sup>. Better  
46  
47 health education and care were important components for treating acne patients. They help  
48  
49 eliminate the patients' misconceptions about the disease and unrealistic treatment  
50  
51  
52  
53  
54  
55  
56  
57  
58  
59  
60



1  
2  
3 expectations <sup>54</sup>. The psychological interventions may vary between different clinical  
4  
5 settings and lead to a bias for the effect of isotretinoin. Besides, data on the efficacy or side  
6  
7 effect of the use of isotretinoin were insufficient in most included studies. Isotretinoin may  
8  
9 cause teratogenic toxicity. Contraceptives are recommended for female users of fertile age  
10  
11 to prevent pregnancy until the completion of treatment <sup>41</sup>. The levels of blood cholesterol  
12  
13 and liver enzymes may be abnormal and should be monitored during the treatment phase <sup>55</sup>.  
14  
15 Several shortcomings regarding this meta-analysis should be explained. The sample sizes of  
16  
17 some included studies were still small, which might have limited the statistical power and  
18  
19 increased the chance of missing small effects. Cohort studies may have a bias caused by  
20  
21 participant selection and confounding factors. Most studies compared the before- and  
22  
23 after-treatment data. Ideally, RCTs comparing isotretinoin with placebo or other agents may  
24  
25 provide more robust findings. However, leaving moderate-to-severe acne patients without  
26  
27 the use of isotretinoin maybe unfair and even not ethical. However, no RCT was available  
28  
29 so far, which was a major drawback for studies on this topic. Additionally, the treatment  
30  
31 duration, drug dose, and depression scale varied between different studies. The acne  
32  
33 severity or the dose of isotretinoin varied and was not reported by several studies. Patients  
34  
35 with severe acne or scars or those unresponsive to therapy may have a worse depressive  
36  
37 mood. However, the analyses for these confounding factors were insufficient in most  
38  
39 studies. Approximately one-fifth of acne patients suffered from psychiatric disorders <sup>33</sup>.  
40  
41 Also, some studies were sponsored by corporations <sup>24</sup>, which might have underestimated the  
42  
43 incidence of depressive disorders. Finally, although greater risk of depression was founded  
44  
45  
46  
47  
48  
49  
50  
51  
52  
53  
54  
55  
56  
57  
58  
59  
60

1  
2  
3 in isotretinoin used in pooled retrospective studies, whereas selection and recall biases might  
4  
5  
6 affect the incidence of depression. Further, these conclusions may be unreliable since  
7  
8 smaller cohorts were included in such subsets.  
9

10  
11 This meta-analysis showed that patients may have improved depressive symptoms after the  
12  
13 use of isotretinoin. Psychologists are encouraged to participate in the management of acne  
14  
15 patients. Further, the use of isotretinoin in acne patients did not contribute to the development  
16  
17 of depression. While the summary results of retrospective studies suggested the use of isotretinoin  
18  
19 in acne patients might increase risk of depression. Future prospective controlled trials are  
20  
21 warranted to verify the present findings.  
22  
23  
24  
25  
26  
27  
28

### 29 **Funding**

30  
31 Not applicable.  
32  
33  
34  
35  
36

### 37 **A competing interests statement.**

38  
39 Not declared.  
40  
41  
42  
43

### 44 **Author's contribution**

45  
46 CQL and LK contributed to conception and design; CQL, JMC, WW, MA, QZ and LK  
47  
48 contributed to acquisition of data, or analysis and interpretation of data; CQL, JMC, WW,  
49  
50 MA, QZ and LK have been involved in drafting the manuscript or revising it critically for  
51  
52  
53  
54  
55  
56  
57  
58  
59  
60

1  
2  
3  
4  
5  
6  
7  
8  
9  
10  
11  
12  
13  
14  
15  
16  
17  
18  
19  
20  
21  
22  
23  
24  
25  
26  
27  
28  
29  
30  
31  
32  
33  
34  
35  
36  
37  
38  
39  
40  
41  
42  
43  
44  
45  
46  
47  
48  
49  
50  
51  
52  
53  
54  
55  
56  
57  
58  
59  
60

important intellectual content; all authors have given final approval of the version to be published.

**A data sharing statement**

No additional data are available.

For peer review only

**REFERENCES**

- 1 Williams HC, Dellavalle RP, Garner S. Acne vulgaris. *Lancet* 2012;**379**:361-72.
- 2 Katsambas AD, Stefanaki C, Cunliffe WJ. Guidelines for treating acne. *Clin Dermatol* 2004;**22**:439-44.
- 3 Dreno B, Poli F. Epidemiology of acne. *Dermatology* 2003;**206**:7-10.
- 4 James WD. Clinical practice. Acne. *N Engl J Med* 2005;**352**:1463-72.
- 5 Thomas DR. Psychosocial effects of acne. *J Cutan Med Surg* 2004;**8 Suppl 4**:3-5.
- 6 Saitta P, Keehan P, Yousif J, et al. An update on the presence of psychiatric comorbidities in acne patients, Part 2: Depression, anxiety, and suicide. *Cutis* 2011;**88**:92-7.
- 7 Dawson AL, Dellavalle RP. Acne vulgaris. *BMJ* 2013;**346**:f2634.
- 8 Chivot M. Retinoid therapy for acne. A comparative review. *Am J Clin Dermatol* 2005;**6**:13-9.
- 9 Wessels F, Anderson AN, Kropman K. The cost-effectiveness of isotretinoin in the treatment of acne. Part 1. A meta-analysis of effectiveness literature. *S Afr Med J* 1999;**89**:780-4.
- 10 Kurek A, Johanne Peters EM, Sabat R, et al. Depression is a frequent co-morbidity in patients with acne inversa. *J Dtsch Dermatol Ges* 2013;**11**:743-9, 43-50.
- 11 Borovaya A, Olisova O, Ruzicka T, et al. Does isotretinoin therapy of acne cure or cause depression? *Int J Dermatol* 2013;**52**:1040-52.
- 12 Wolverton SE, Harper JC. Important controversies associated with isotretinoin therapy for acne. *Am J Clin Dermatol* 2013;**14**:71-6.

- 1  
2  
3  
4 13 Kontaxakis VP, Skourides D, Ferentinos P, et al. Isotretinoin and psychopathology: a  
5  
6 review. *Ann Gen Psychiatry* 2009;**8**:2.  
7  
8  
9 14 Moher D, Liberati A, Tetzlaff J, et al. Preferred reporting items for systematic reviews  
10  
11 and meta-analyses: the PRISMA statement. *PLoS Med* 2009;**6**:e1000097.  
12  
13  
14 15 Smarr KL, Keefer AL. Measures of depression and depressive symptoms: Beck  
15  
16 Depression Inventory-II (BDI-II), Center for Epidemiologic Studies Depression Scale  
17  
18 (CES-D), Geriatric Depression Scale (GDS), Hospital Anxiety and Depression Scale  
19  
20 (HADS), and Patient Health Questionnaire-9 (PHQ-9). *Arthritis Care Res (Hoboken)*  
21  
22 2011;**63 Suppl 11**:S454-66.  
23  
24  
25  
26 16 Wells GA, Shea B, O'Connell D, et al. The Newcastle-Ottawa Scale (NOS) for assessing  
27  
28 the quality of nonrandomised studies in meta-analyses.  
29  
30 [http://www.ohrica/programs/clinical\\_epidemiology/oxfordasp](http://www.ohrica/programs/clinical_epidemiology/oxfordasp)  
31  
32  
33  
34 17 Wan X, Wang W, Liu J, et al. Estimating the sample mean and standard deviation from  
35  
36 the sample size, median, range and/or interquartile range. *BMC Med Res Methodol*  
37  
38 2014;**14**:135.  
39  
40  
41  
42 18 DerSimonian R, Laird N. Meta-analysis in clinical trials. *Control Clin Trials*  
43  
44 1986;**7**:177-88.  
45  
46  
47 19 Higgins JP, Thompson SG, Deeks JJ, et al. Measuring inconsistency in meta-analyses.  
48  
49 *BMJ* 2003;**327**:557-60.  
50  
51  
52 20 Higgins JP, Thompson SG. Quantifying heterogeneity in a meta-analysis. *Stat Med*  
53  
54 2002;**21**:1539-58.  
55  
56  
57  
58  
59  
60

- 1  
2  
3  
4 21 Begg CB, Mazumdar M. Operating characteristics of a rank correlation test for  
5  
6 publication bias. *Biometrics* 1994;**50**:1088-101.  
7
- 8  
9 22 Egger M, Davey Smith G, Schneider M, et al. Bias in meta-analysis detected by a simple,  
10  
11 graphical test. *BMJ* 1997;**315**:629-34.  
12
- 13  
14 23 Kellett SC, Gawkrödger DJ. The psychological and emotional impact of acne and the  
15  
16 effect of treatment with isotretinoin. *Br J Dermatol* 1999;**140**:273-82.  
17
- 18  
19 24 Jick SS, Kremers HM, Vasilakis-Scaramozza C. Isotretinoin use and risk of depression,  
20  
21 psychotic symptoms, suicide, and attempted suicide. *Arch Dermatol* 2000;**136**:1231-6.  
22
- 23  
24 25 Ng CH, Tam MM, Celi E, et al. Prospective study of depressive symptoms and quality of  
25  
26 life in acne vulgaris patients treated with isotretinoin compared to antibiotic and topical  
27  
28 therapy. *Australas J Dermatol* 2002;**43**:262-8.  
29
- 30  
31 26 Ferahbas A, Turan MT, Esel E, et al. A pilot study evaluating anxiety and depressive  
32  
33 scores in acne patients treated with isotretinoin. *J Dermatolog Treat* 2004;**15**:153-7.  
34
- 35  
36 27 Chia CY, Lane W, Chibnall J, et al. Isotretinoin therapy and mood changes in adolescents  
37  
38 with moderate to severe acne: a cohort study. *Arch Dermatol* 2005;**141**:557-60.  
39
- 40  
41 28 Kellett SC, Gawkrödger DJ. A prospective study of the responsiveness of depression and  
42  
43 suicidal ideation in acne patients to different phases of isotretinoin therapy. *Eur J*  
44  
45 *Dermatol* 2005;**15**:484-8.  
46
- 47  
48 29 Kaymak Y, Kalay M, Ilter N, et al. Incidence of depression related to isotretinoin  
49  
50 treatment in 100 acne vulgaris patients. *Psychol Rep* 2006;**99**:897-906.  
51
- 52  
53 30 Cohen J, Adams S, Patten S. No association found between patients receiving  
54  
55  
56  
57  
58  
59  
60

- 1  
2  
3 isotretinoin for acne and the development of depression in a Canadian prospective  
4  
5 cohort. *Can J Clin Pharmacol* 2007;**14**:e227-33.  
6  
7
- 8  
9 31 Azoulay L, Blais L, Koren G, et al. Isotretinoin and the risk of depression in patients  
10  
11 with acne vulgaris: a case-crossover study. *J Clin Psychiatry* 2008;**69**:526-32.  
12
- 13  
14 32 Bozdag KE, Gulseren S, Guven F, et al. Evaluation of depressive symptoms in acne  
15  
16 patients treated with isotretinoin. *J Dermatolog Treat* 2009;**20**:293-6.  
17
- 18  
19 33 Kaymak Y, Taner E, Taner Y. Comparison of depression, anxiety and life quality in acne  
20  
21 vulgaris patients who were treated with either isotretinoin or topical agents. *Int J*  
22  
23 *Dermatol* 2009;**48**:41-6.  
24
- 25  
26 34 Rehn LM, Meririnne E, Hook-Nikanne J, et al. Depressive symptoms and suicidal  
27  
28 ideation during isotretinoin treatment: a 12-week follow-up study of male Finnish  
29  
30 military conscripts. *J Eur Acad Dermatol Venereol* 2009;**23**:1294-7.  
31
- 32  
33 35 Simic D, Situm M, Letica E, et al. Psychological impact of isotretinoin treatment in  
34  
35 patients with moderate and severe acne. *Coll Antropol* 2009;**33 Suppl 2**:15-9.  
36
- 37  
38 36 McGrath EJ, Lovell CR, Gillison F, et al. A prospective trial of the effects of isotretinoin  
39  
40 on quality of life and depressive symptoms. *Br J Dermatol* 2010;**163**:1323-9.  
41
- 42  
43 37 Fakour Y, Noormohammadpour P, Ameri H, et al. The effect of isotretinoin (roaccutane)  
44  
45 therapy on depression and quality of life of patients with severe acne. *Iran J Psychiatry*  
46  
47 2014;**9**:237-40.  
48
- 49  
50 38 Ergun T, Seckin D, Ozaydin N, et al. Isotretinoin has no negative effect on attention,  
51  
52 executive function and mood. *J Eur Acad Dermatol Venereol* 2012;**26**:431-9.  
53  
54  
55  
56  
57

- 1  
2  
3  
4 39 Ormerod AD, Thind CK, Rice SA, et al. Influence of isotretinoin on hippocampal-based  
5  
6 learning in human subjects. *Psychopharmacology (Berl)* 2012;**221**:667-74.  
7  
8  
9 40 Yesilova Y, Bez Y, Ari M, et al. Effects of isotretinoin on obsessive compulsive  
10  
11 symptoms, depression, and anxiety in patients with acne vulgaris. *J Dermatolog Treat*  
12  
13 2012;**23**:268-71.  
14  
15  
16 41 Marron SE, Tomas-Aragones L, Boira S. Anxiety, depression, quality of life and patient  
17  
18 satisfaction in acne patients treated with oral isotretinoin. *Acta Derm Venereol*  
19  
20 2013;**93**:701-6.  
21  
22  
23 42 Gnanaraj P, Karthikeyan S, Narasimhan M, et al. Decrease in "Hamilton Rating Scale for  
24  
25 Depression" Following Isotretinoin Therapy in Acne: An Open-Label Prospective  
26  
27 Study. *Indian J Dermatol* 2015;**60**:461-4.  
28  
29  
30  
31 43 Suarez B, Serrano A, Cova Y, et al. Isotretinoin was not associated with depression or  
32  
33 anxiety: A twelve-week study. *World J Psychiatry* 2016;**6**:136-42.  
34  
35  
36  
37 44 Marqueling AL, Zane LT. Depression and suicidal behavior in acne patients treated with  
38  
39 isotretinoin: a systematic review. *Semin Cutan Med Surg* 2007;**26**:210-20.  
40  
41  
42 45 Vallerand IA, Lewinson RT. Efficacy and adverse events of oral isotretinoin for acne: a  
43  
44 systematic review. 2017;  
45  
46  
47 46 Huang YC, Cheng YC. Isotretinoin treatment for acne and risk of depression: A  
48  
49 systematic review and meta-analysis. *J Am Acad Dermatol* 2017;**76**:1068-76.e9.  
50  
51  
52 47 Crandall J, Sakai Y, Zhang J, et al. 13-cis-retinoic acid suppresses hippocampal cell  
53  
54 division and hippocampal-dependent learning in mice. *Proc Natl Acad Sci U S A*  
55  
56  
57  
58  
59  
60



- 1  
2  
3  
4 2004;**101**:5111-6.  
5  
6 48 Bremner JD, Fani N, Ashraf A, et al. Functional brain imaging alterations in acne  
7  
8 patients treated with isotretinoin. *Am J Psychiatry* 2005;**162**:983-91.  
9  
10  
11 49 O'Reilly KC, Trent S, Bailey SJ, et al. 13-cis-Retinoic acid alters intracellular serotonin,  
12  
13 increases 5-HT1A receptor, and serotonin reuptake transporter levels in vitro. *Exp Biol*  
14  
15 *Med (Maywood)* 2007;**232**:1195-203.  
16  
17  
18 50 Misery L. Consequences of psychological distress in adolescents with acne. *J Invest*  
19  
20 *Dermatol* 2011;**131**:290-2.  
21  
22  
23 51 Aktan S, Ozmen E, Sanli B. Anxiety, depression, and nature of acne vulgaris in  
24  
25 adolescents. *Int J Dermatol* 2000;**39**:354-7.  
26  
27  
28 52 Yang YC, Tu HP, Hong CH. Female gender and acne disease are jointly and  
29  
30 independently associated with the risk of major depression and suicide: a national  
31  
32 population-based study. *BioMed Research International* 2014;**2014**:504279.  
33  
34  
35 53 Smithard A, Glazebrook C, Williams HC. Acne prevalence, knowledge about acne and  
36  
37 psychological morbidity in mid-adolescence: a community-based study. *Br J Dermatol*  
38  
39 2001;**145**:274-9.  
40  
41  
42  
43 54 Thiboutot D, Dreno B, Layton A. Acne counseling to improve adherence. *Cutis*  
44  
45 2008;**81**:81-6.  
46  
47  
48 55 Hansen TJ, Lucking S, Miller JJ, et al. Standardized laboratory monitoring with use of  
49  
50 isotretinoin in acne. *J Am Acad Dermatol* 2016;**75**:323-8.  
51  
52  
53  
54  
55  
56  
57  
58  
59  
60

**Table 1.** Characteristics of included studies

| Author (year)          | Region    | Design        | Isotretinoin users | Mean/Median age (year) | Female (%) | Acne severity      | Comparison groups | Dose                     | Treatment duration | Depression assessment |
|------------------------|-----------|---------------|--------------------|------------------------|------------|--------------------|-------------------|--------------------------|--------------------|-----------------------|
| Kellett et al. (1999)  | UK        | Prospective   | 34                 | 24                     | 44         | NA                 | Before after      | vs. 1.0 mg/(kg · d)      | 4 months           | HADS-D                |
| Bick et al. (2000) a   | Canada    | Retrospective | 7195               | <30 (75%)              | 47         | NA                 | Before after      | vs. 40 mg (86%)          | 3–6 months (62%)   | ICD code              |
| Bick et al. (2000) b   | UK        | Retrospective | 340                | <30 (78%)              | 42         | NA                 | Before after      | vs. 20 mg (75%)          | 1–2 months (81%)   | ICD code              |
| Ng et al. (2002)       | Australia | Prospective   | 174                | 20                     | 41         | Moderate to severe | Before after      | vs. 0.8–1.0 mg/(kg · d)  | 6 months           | BDI                   |
| Ferahbas et al. (2004) | Turkey    | Prospective   | 23                 | 20                     | 43         | Severe             | Before after      | vs. 0.5–1.0 mg/(kg · d)  | 4 months           | MADRS                 |
| Kellett et al. (2005)  | UK        | Prospective   | 33                 | 25                     | 36         | NA                 | Before after      | vs. 1.0 mg/(kg · d)      | 4 months           | BDI                   |
| Kaymak et al. (2006)   | Turkey    | Prospective   | 24                 | 100                    | 58         | Moderate           | Before after      | vs. 0.75–1.0 mg/(kg · d) | 5–7 months         | HRS                   |
| Chia et al. (2005)     | USA       | Prospective   | 59                 | 12–19                  | 25         | Moderate to severe | Before after      | vs. 1.0 mg/(kg · d)      | 3–4 months         | CES-D                 |
| Azoulay et al. (2008)  | Canada    | Retrospective | 126                | 28                     | 53         | NA                 | Users nonusers    | vs. NA                   | 5 months           | ICD code              |
| Kaymak et al. (2009)   | Turkey    | Prospective   | 37                 | 21                     | 69         | Mild to severe     | Before after      | vs. 0.5–0.8 mg/(kg · d)  | > 5 months         | BDI, HADS-D           |
| Pozdag et al. (2009)   | Turkey    | Prospective   | 50                 | 20                     | 52         | Moderate to severe | Before after      | vs. 1.0 mg/(kg · d)      | 4 months           | BDI                   |

|    |                        |                        |             |     |    |    |           |               |     |                     |            |        |
|----|------------------------|------------------------|-------------|-----|----|----|-----------|---------------|-----|---------------------|------------|--------|
| 1  |                        |                        |             |     |    |    |           |               |     |                     |            |        |
| 2  |                        |                        |             |     |    |    |           |               |     |                     |            |        |
| 3  |                        |                        |             |     |    |    |           |               |     |                     |            |        |
| 4  |                        |                        |             |     |    |    |           |               |     |                     |            |        |
| 5  |                        |                        |             |     |    |    |           |               |     |                     |            |        |
| 6  | Rehn et al. (2009)     | Finland                | Prospective | 126 | 20 | 0  | Moderate  | Before        | vs. | 0.5 mg/(kg · d)     | 3 months   | BDI    |
| 7  |                        |                        |             |     |    |    | to severe | after         |     |                     |            |        |
| 8  |                        |                        |             |     |    |    |           |               |     |                     |            |        |
| 9  | Simic et al. (2009)    | Bosnia and Herzegovina | Prospective | 85  | 19 | 34 | Moderate  | Isotretinoin  |     | 1.0 mg/(kg · d)     | 2 months   | BDI    |
| 10 |                        |                        |             |     |    |    | to severe | vs. vitamin C |     |                     |            |        |
| 11 |                        |                        |             |     |    |    |           |               |     |                     |            |        |
| 12 |                        |                        |             |     |    |    |           |               |     |                     |            |        |
| 13 | McGrath et al. (2010)  | UK                     | Prospective | 65  | 20 | 31 | Mean      | Before        | vs. | 0.5–1.0 mg/(kg · d) | 3 months   | CES-D  |
| 14 |                        |                        |             |     |    |    | AGS       | after         |     |                     |            |        |
| 15 |                        |                        |             |     |    |    | score 3.3 |               |     |                     |            |        |
| 16 |                        |                        |             |     |    |    |           |               |     |                     |            |        |
| 17 | Ergun et al. (2012)    | Turkey                 | Prospective | 65  | 22 | 73 | Severe or | Before        | vs. | 0.5–1.0 mg/(kg · d) | ≈ 5 months | HADS-D |
| 18 |                        |                        |             |     |    |    | resistant | after         |     |                     |            |        |
| 19 |                        |                        |             |     |    |    |           |               |     |                     |            |        |
| 20 | Ormerod et al. (2012)  | UK                     | Prospective | 16  | 22 | 25 | Severe    | Before        | vs. | 0.5–1.0 mg/(kg · d) | 3–6 months | BDI    |
| 21 |                        |                        |             |     |    |    |           | after         |     |                     |            |        |
| 22 |                        |                        |             |     |    |    |           |               |     |                     |            |        |
| 23 | Yesilova et al. (2012) | Turkey                 | Prospective | 43  | 23 | 70 | Mild to   | Before        | vs. | 0.5–1.0 mg/(kg · d) | 6 months   | HADS-D |
| 24 |                        |                        |             |     |    |    | severe    | after         |     |                     |            |        |
| 25 |                        |                        |             |     |    |    |           |               |     |                     |            |        |
| 26 | Marron et al. (2013)   | Spain                  | Prospective | 346 | 21 | 59 | Moderate  | Before        | vs. | Total: 120 mg/kg    | 7 months   | HADS-D |
| 27 |                        |                        |             |     |    |    |           | after         |     |                     |            |        |
| 28 | Fakour et al. (2014)   | Iran                   | Prospective | 98  | 22 | 61 | Severe    | Before        | vs. | 0.5 mg/(kg · d)     | 4 months   | BDI    |
| 29 |                        |                        |             |     |    |    |           | after         |     |                     |            |        |
| 30 | Gnanaraj et al. (2015) | India                  | Prospective | 143 | 21 | 34 | Moderate  | Before        | vs. | 0.5 mg/(kg · d)     | 3 months   | HRS    |
| 31 |                        |                        |             |     |    |    | to severe | after         |     |                     |            |        |
| 32 |                        |                        |             |     |    |    |           |               |     |                     |            |        |
| 33 | Suarez et al. (2016)   | Venezuela              | Prospective | 36  | 21 | 44 | Severe    | Before        | vs. | 30 mg/d             | 3 months   | ZDS    |
| 34 |                        |                        |             |     |    |    | (25%)     | after         |     |                     |            |        |

AGS, acne grading scale; BDI, Beck Depression Inventory; CES-D, Center for Epidemiologic Studies Depression Scale; HADS-D, hospital anxiety and depression scale-depression; HRS, Hamilton Rating Scale; ICD, International Classification of Diseases; MADRS, Montgomery–Asberg depression rating scale; NA, not available; ZDS, Zung self-rating depression scale.

**Table 2.** Subgroup analysis for studies presenting depressive symptom scores after isotretinoin compared with the baseline

| Subgroups                            | Number of cohorts | SMD (95% CI)           | <i>P</i> value | <i>I</i> <sup>2</sup> ( <i>P</i> value) |
|--------------------------------------|-------------------|------------------------|----------------|-----------------------------------------|
| <b>Region</b>                        |                   |                        |                |                                         |
| Europe                               | 14                | -0.35 (-0.51 to -0.19) | <0.05          | 46.3% (<0.05)                           |
| Asia                                 | 3                 | -0.18 (-0.81 to 0.45)  | 0.57           | 94.4% (<0.05)                           |
| North America                        | 1                 | -0.23 (-0.59 to 0.13)  | 0.21           | –                                       |
| Africa                               | 1                 | -0.74 (-1.22 to -0.26) | <0.05          | –                                       |
| <b>Depression scale</b>              |                   |                        |                |                                         |
| BDI                                  | 10                | 0.10 (-0.12 to 0.32)   | 0.38           | 65.2% (<0.05)                           |
| HADS-D                               | 4                 | 0.57 (0.31 to 0.83)    | <0.05          | 27.2% (0.25)                            |
| CES-D                                | 2                 | 0.27 (0.02 to 0.52)    | <0.05          | 0% (0.78)                               |
| HRS                                  | 2                 | 0.55 (-0.46 to 1.56)   | 0.29           | 96.6% (<0.05)                           |
| MADRS                                | 1                 | 0.33 (-0.25 to 0.91)   | 0.27           | –                                       |
| ZDS                                  | 1                 | 0.74 (0.26 to 1.22)    | <0.05          | –                                       |
| <b>Sample size</b>                   |                   |                        |                |                                         |
| <50                                  | 9                 | -0.38 (-0.65 to -0.12) | <0.05          | 64.0% (<0.05)                           |
| ≥50                                  | 11                | -0.29 (-0.54 to -0.04) | <0.05          | 83.1% (<0.05)                           |
| <b>Percentage of female patients</b> |                   |                        |                |                                         |
| <50                                  | 12                | -0.32 (-0.55 to -0.09) | <0.05          | 76.8% (<0.05)                           |
| ≥50                                  | 8                 | -0.34 (-0.04 to -0.64) | <0.05          | 78.4% (<0.05)                           |

BDI, Beck Depression Inventory; CES-D, Center for Epidemiologic Studies Depression Scale; CI, confidence interval; HADS-D, hospital anxiety and depression scale-depression; HRS, Hamilton Rating Scale; MADRS, Montgomery–Asberg depression rating scale; SMD, standardized mean difference; ZDS, Zung self-rating depression scale.

1  
2  
3  
4 **Figure legends:**  
5

6 **Figure. 1.** Study selection process.  
7

8 **Figure. 2.** Forest plot showing the standardized mean difference for the comparison of  
9 depression symptom scores before and after isotretinoin treatment in acne patients.  
10  
11

12 **Figure. 3.** Funnel plot of studies comparing depression symptom scores before and after  
13 isotretinoin treatment in acne patients.  
14  
15

16 **Figure. 4.** Forest plot showing the weighted mean difference for the comparison of BDI  
17 scores before and after isotretinoin treatment in acne patients.  
18  
19

20 **Figure. 5.** Forest plot showing the association between isotretinoin treatment and  
21 depression in acne patients.  
22  
23

24 **Figure. 6.** Funnel plot of showing the association between isotretinoin treatment and  
25 depression in acne patients.  
26  
27  
28

29  
30  
31  
32  
33  
34  
35  
36 **Legends for supporting information**  
37

38  
39 **Supplemental Table1.** Newcastle–Ottawa scale for quality assessment of included studies  
40  
41  
42  
43  
44  
45  
46  
47  
48  
49  
50  
51  
52  
53  
54  
55  
56  
57  
58  
59  
60

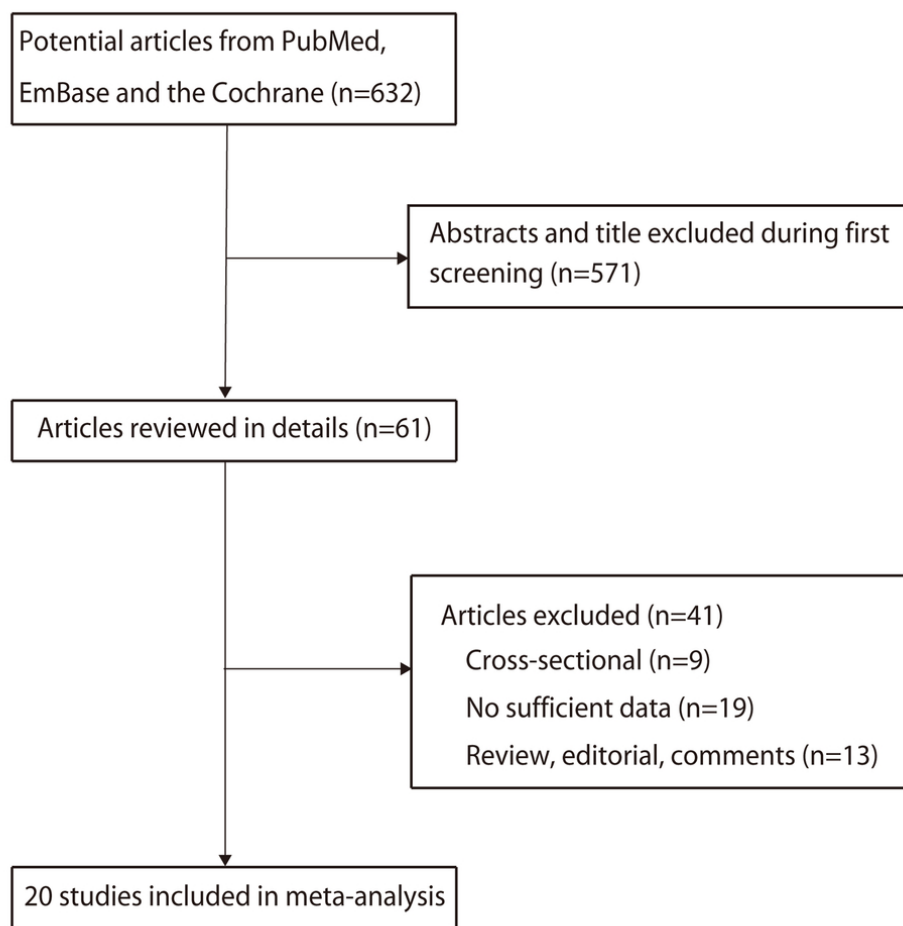

83x83mm (300 x 300 DPI)

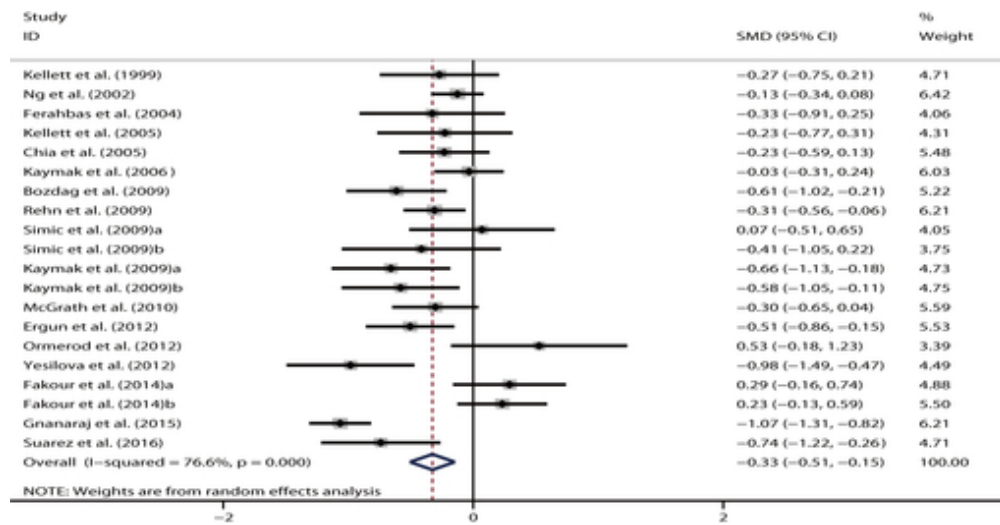

43x22mm (300 x 300 DPI)

1  
2  
3  
4  
5  
6  
7  
8  
9  
10  
11  
12  
13  
14  
15  
16  
17  
18  
19  
20  
21  
22  
23  
24  
25  
26  
27  
28  
29  
30  
31  
32  
33  
34  
35  
36  
37  
38  
39  
40  
41  
42  
43  
44  
45  
46  
47  
48  
49  
50  
51  
52  
53  
54  
55  
56  
57  
58  
59  
60

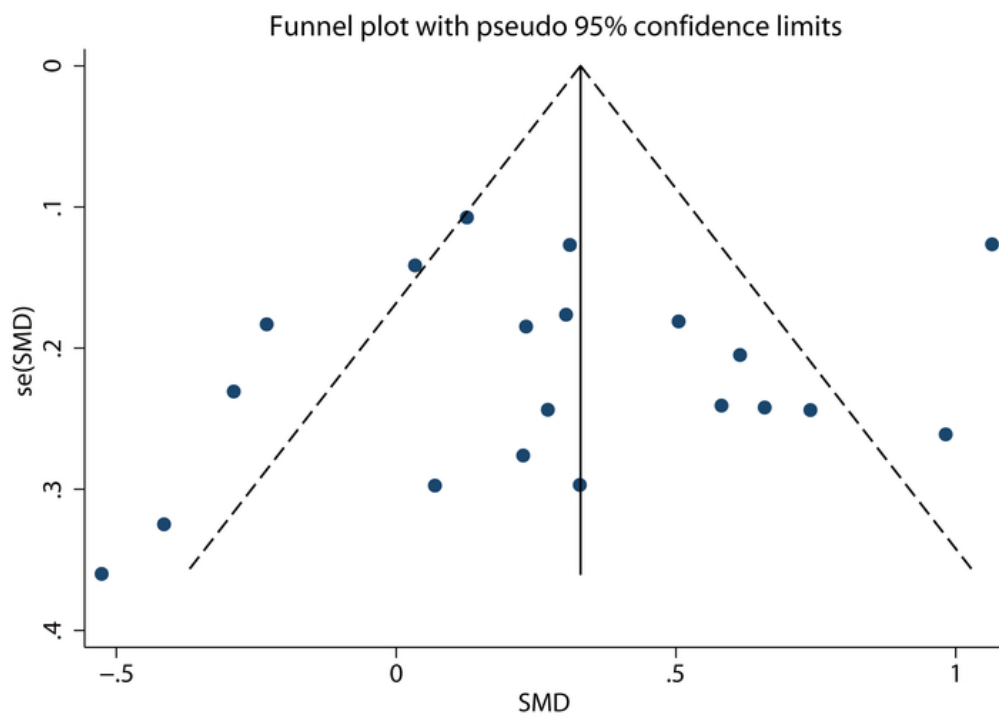

59x41mm (300 x 300 DPI)



1  
2  
3  
4  
5  
6  
7  
8  
9  
10  
11  
12  
13  
14  
15  
16  
17  
18  
19  
20  
21  
22  
23  
24  
25  
26  
27  
28  
29  
30  
31  
32  
33  
34  
35  
36  
37  
38  
39  
40  
41  
42  
43  
44  
45  
46  
47  
48  
49  
50  
51  
52  
53  
54  
55  
56  
57  
58  
59  
60

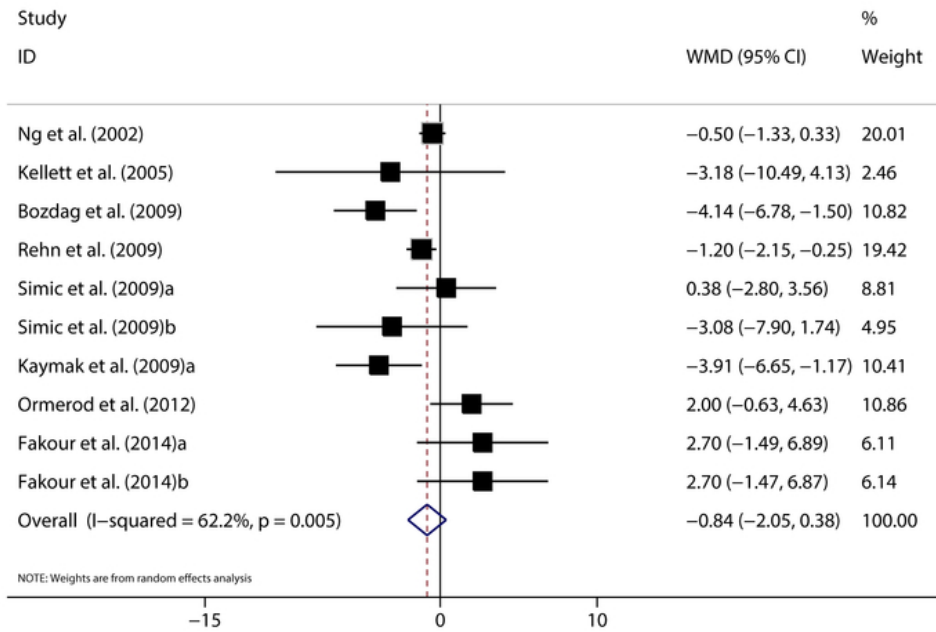

61x44mm (300 x 300 DPI)

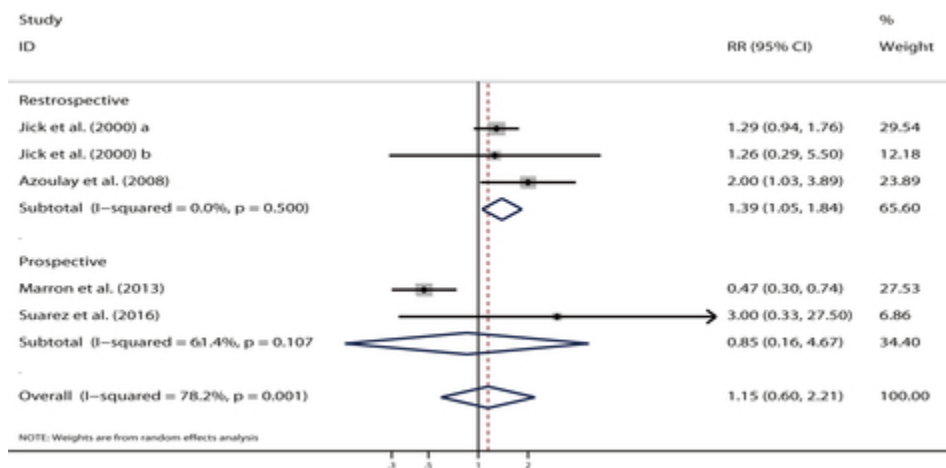

40x19mm (300 x 300 DPI)

1  
2  
3  
4  
5  
6  
7  
8  
9  
10  
11  
12  
13  
14  
15  
16  
17  
18  
19  
20  
21  
22  
23  
24  
25  
26  
27  
28  
29  
30  
31  
32  
33  
34  
35  
36  
37  
38  
39  
40  
41  
42  
43  
44  
45  
46  
47  
48  
49  
50  
51  
52  
53  
54  
55  
56  
57  
58  
59  
60

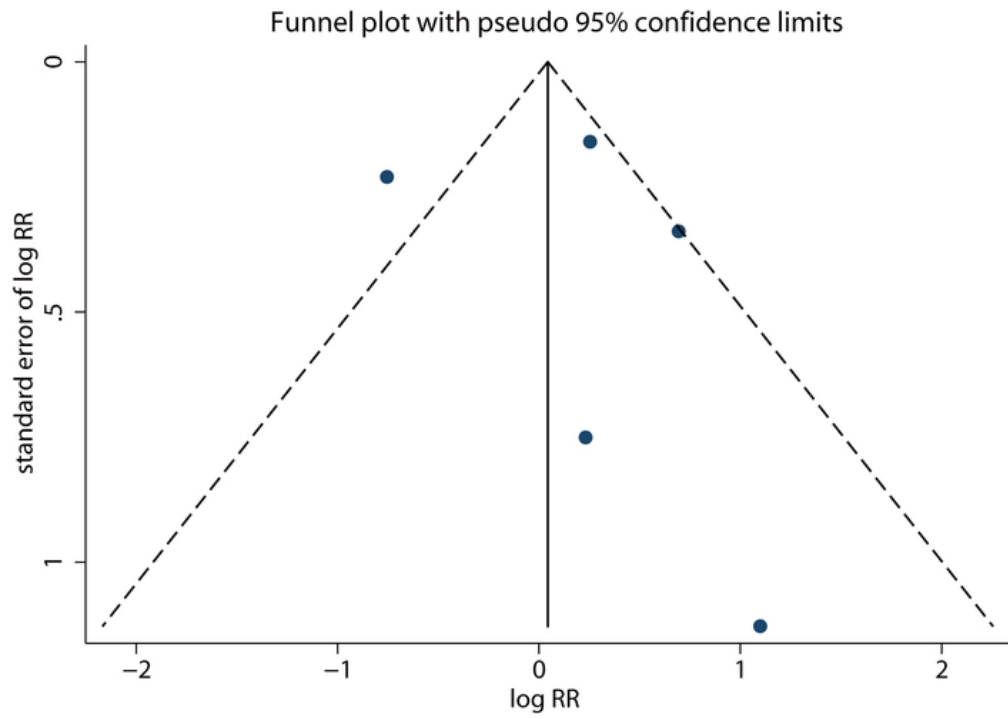

59x41mm (300 x 300 DPI)

**Supplementary Table 1** Newcastle–Ottawa scale for quality assessment of included studies

| <b>Study</b>           | <b>Selection</b> | <b>Comparability</b> | <b>Outcome</b> |
|------------------------|------------------|----------------------|----------------|
| Kellett et al. (1999)  | ****             | *                    | ***            |
| Jick et al. (2000) a   | ****             | **                   | **             |
| Jick et al. (2000) b   | ****             | **                   | **             |
| Ng et al. (2002)       | ****             | *                    | ***            |
| Ferahbas et al. (2004) | ****             | *                    | ***            |
| Kellett et al. (2005)  | ****             | *                    | ***            |
| Kaymak et al. (2006)   | ****             | *                    | ***            |
| Chia et al. (2005)     | ***              | *                    | ***            |
| Azoulay et al. (2008)  | ****             | **                   | **             |
| Kaymak et al. (2009)   | ****             | *                    | ***            |
| Bozdog et al. (2009)   | ****             | *                    | ***            |
| Rehn et al. (2009)     | ***              | *                    | ***            |
| Simic et al. (2009)    | ****             | *                    | ***            |
| McGrath et al. (2010)  | ****             | *                    | ***            |
| Ergun et al. (2012)    | ****             | *                    | ***            |
| Ormerod et al. (2012)  | ***              | *                    | ***            |
| Yesilova et al. (2012) | ****             | *                    | ***            |
| Marron et al. (2013)   | ****             | *                    | ***            |
| Fakour et al. (2014)   | ****             | *                    | ***            |
| Gnanaraj et al. (2015) | ****             | *                    | ***            |
| Suarez et al. (2016)   | ****             | *                    | ***            |

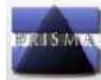

# PRISMA 2009 Checklist

| Section/topic                      | #  | Checklist item                                                                                                                                                                                                                                                                                              | Reported on page # |
|------------------------------------|----|-------------------------------------------------------------------------------------------------------------------------------------------------------------------------------------------------------------------------------------------------------------------------------------------------------------|--------------------|
| <b>TITLE</b>                       |    |                                                                                                                                                                                                                                                                                                             |                    |
| Title                              | 1  | Identify the report as a systematic review, meta-analysis, or both.                                                                                                                                                                                                                                         | 1                  |
| <b>ABSTRACT</b>                    |    |                                                                                                                                                                                                                                                                                                             |                    |
| Structured summary                 | 2  | Provide a structured summary including, as applicable: background; objectives; data sources; study eligibility criteria, participants, and interventions; study appraisal and synthesis methods; results; limitations; conclusions and implications of key findings; systematic review registration number. | 2                  |
| <b>INTRODUCTION</b>                |    |                                                                                                                                                                                                                                                                                                             |                    |
| Rationale                          | 3  | Describe the rationale for the review in the context of what is already known.                                                                                                                                                                                                                              | 3                  |
| Objectives                         | 4  | Provide an explicit statement of questions being addressed with reference to participants, interventions, comparisons, outcomes, and study design (PICOS).                                                                                                                                                  | 3                  |
| <b>METHODS</b>                     |    |                                                                                                                                                                                                                                                                                                             |                    |
| Protocol and registration          | 5  | Indicate if a review protocol exists, if and where it can be accessed (e.g., Web address), and, if available, provide registration information including registration number.                                                                                                                               | 4                  |
| Eligibility criteria               | 6  | Specify study characteristics (e.g., PICOS, length of follow-up) and report characteristics (e.g., years considered, language, publication status) used as criteria for eligibility, giving rationale.                                                                                                      | 4                  |
| Information sources                | 7  | Describe all information sources (e.g., databases with dates of coverage, contact with study authors to identify additional studies) in the search and date last searched.                                                                                                                                  | 4                  |
| Search                             | 8  | Present full electronic search strategy for at least one database, including any limits used, such that it could be repeated.                                                                                                                                                                               | 4                  |
| Study selection                    | 9  | State the process for selecting studies (i.e., screening, eligibility, included in systematic review, and, if applicable, included in the meta-analysis).                                                                                                                                                   | 4                  |
| Data collection process            | 10 | Describe method of data extraction from reports (e.g., piloted forms, independently, in duplicate) and any processes for obtaining and confirming data from investigators.                                                                                                                                  | 4                  |
| Data items                         | 11 | List and define all variables for which data were sought (e.g., PICOS, funding sources) and any assumptions and simplifications made.                                                                                                                                                                       | 4                  |
| Risk of bias in individual studies | 12 | Describe methods used for assessing risk of bias of individual studies (including specification of whether this was done at the study or outcome level), and how this information is to be used in any data synthesis.                                                                                      | 4                  |
| Summary measures                   | 13 | State the principal summary measures (e.g., risk ratio, difference in means).                                                                                                                                                                                                                               | 4-5                |
| Synthesis of results               | 14 | Describe the methods of handling data and combining results of studies, if done, including measures of consistency (e.g., $I^2$ ) for each meta-analysis.                                                                                                                                                   | 4-5                |

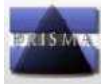

# PRISMA 2009 Checklist

| Section/topic                 | #  | Checklist item                                                                                                                                                                                           | Reported on page # |
|-------------------------------|----|----------------------------------------------------------------------------------------------------------------------------------------------------------------------------------------------------------|--------------------|
| Risk of bias across studies   | 15 | Specify any assessment of risk of bias that may affect the cumulative evidence (e.g., publication bias, selective reporting within studies).                                                             | 4-5                |
| Additional analyses           | 16 | Describe methods of additional analyses (e.g., sensitivity or subgroup analyses, meta-regression), if done, indicating which were pre-specified.                                                         | 5                  |
| <b>RESULTS</b>                |    |                                                                                                                                                                                                          |                    |
| Study selection               | 17 | Give numbers of studies screened, assessed for eligibility, and included in the review, with reasons for exclusions at each stage, ideally with a flow diagram.                                          | 5                  |
| Study characteristics         | 18 | For each study, present characteristics for which data were extracted (e.g., study size, PICOS, follow-up period) and provide the citations.                                                             | 6                  |
| Risk of bias within studies   | 19 | Present data on risk of bias of each study and, if available, any outcome level assessment (see item 12).                                                                                                | 6                  |
| Results of individual studies | 20 | For all outcomes considered (benefits or harms), present, for each study: (a) simple summary data for each intervention group (b) effect estimates and confidence intervals, ideally with a forest plot. | 6-7                |
| Synthesis of results          | 21 | Present results of each meta-analysis done, including confidence intervals and measures of consistency.                                                                                                  | 6-7                |
| Risk of bias across studies   | 22 | Present results of any assessment of risk of bias across studies (see Item 15).                                                                                                                          | 6-7                |
| Additional analysis           | 23 | Give results of additional analyses, if done (e.g., sensitivity or subgroup analyses, meta-regression [see Item 16]).                                                                                    | 6-7                |
| <b>DISCUSSION</b>             |    |                                                                                                                                                                                                          |                    |
| Summary of evidence           | 24 | Summarize the main findings including the strength of evidence for each main outcome; consider their relevance to key groups (e.g., healthcare providers, users, and policy makers).                     | 7-9                |
| Limitations                   | 25 | Discuss limitations at study and outcome level (e.g., risk of bias), and at review-level (e.g., incomplete retrieval of identified research, reporting bias).                                            | 9                  |
| Conclusions                   | 26 | Provide a general interpretation of the results in the context of other evidence, and implications for future research.                                                                                  | 9                  |
| <b>FUNDING</b>                |    |                                                                                                                                                                                                          |                    |
| Funding                       | 27 | Describe sources of funding for the systematic review and other support (e.g., supply of data); role of funders for the systematic review.                                                               | N/A                |

From: Moher D, Liberati A, Tetzlaff J, Altman DG, The PRISMA Group (2009). Preferred Reporting Items for Systematic Reviews and Meta-Analyses: The PRISMA Statement. PLoS Med 6(6): e1000097. doi:10.1371/journal.pmed1000097

For more information, visit: [www.prisma-statement.org](http://www.prisma-statement.org).

# BMJ Open

## Use of isotretinoin and risk of depression in patients with acne: a systematic review and meta-analysis

|                                 |                                                                                                                                                                                                                                                                                                                                                                                                                                                                                                                                       |
|---------------------------------|---------------------------------------------------------------------------------------------------------------------------------------------------------------------------------------------------------------------------------------------------------------------------------------------------------------------------------------------------------------------------------------------------------------------------------------------------------------------------------------------------------------------------------------|
| Journal:                        | <i>BMJ Open</i>                                                                                                                                                                                                                                                                                                                                                                                                                                                                                                                       |
| Manuscript ID                   | bmjopen-2018-021549.R1                                                                                                                                                                                                                                                                                                                                                                                                                                                                                                                |
| Article Type:                   | Research                                                                                                                                                                                                                                                                                                                                                                                                                                                                                                                              |
| Date Submitted by the Author:   | 25-May-2018                                                                                                                                                                                                                                                                                                                                                                                                                                                                                                                           |
| Complete List of Authors:       | Li, Changqiang ; the Affiliated Hospital of Southwest Medical University, Department of Dermatology<br>Chen, Jianmei ; the First Affiliated Hospital of Chongqing Medical University, Department of Psychiatry<br>Wang, Wo ; University-Town Hospital of Chongqing Medical University, Mental Health Center<br>Ai, Ming ; the First Affiliated Hospital of Chongqing Medical University, Department of Psychiatry<br>Zhang, Qi ; the First Affiliated Hospital of Chongqing Medical University, Department of Psychiatry<br>Kuang, Li |
| <b>Primary Subject Heading</b>: | Dermatology                                                                                                                                                                                                                                                                                                                                                                                                                                                                                                                           |
| Secondary Subject Heading:      | Dermatology                                                                                                                                                                                                                                                                                                                                                                                                                                                                                                                           |
| Keywords:                       | Acne < DERMATOLOGY, Depression & mood disorders < PSYCHIATRY, ORAL MEDICINE                                                                                                                                                                                                                                                                                                                                                                                                                                                           |
|                                 |                                                                                                                                                                                                                                                                                                                                                                                                                                                                                                                                       |

SCHOLARONE™  
Manuscripts

1  
2  
3 **Use of isotretinoin and risk of depression in patients with acne: a systematic review and**  
4  
5 **meta-analysis**  
6

7  
8 Changqiang Li<sup>2</sup>, Jianmei Chen<sup>1</sup>, Wo Wang<sup>3</sup>, Ming Ai<sup>1</sup>, Qi Zhang<sup>1</sup>, Li Kuang<sup>1\*</sup>  
9

10  
11 <sup>1</sup>Department of Psychiatry, the First Affiliated Hospital of Chongqing Medical University,  
12  
13 Chongqing 400016, China  
14

15  
16 <sup>2</sup>Department of Dermatology, the Affiliated Hospital of Southwest Medical University,  
17  
18 Luzhou646000, China  
19

20  
21 <sup>3</sup>Mental Health Center, University-Town Hospital of Chongqing Medical University,  
22  
23 Chongqing 401331, China  
24

25  
26  
27  
28 **\*Corresponding author:**  
29

30 Li Kuang  
31

32  
33 Department of Psychiatry, the First Affiliated Hospital of Chongqing Medical University,  
34  
35 Chongqing 400016, China  
36

37  
38 Tel: +86-13908379733  
39

40  
41 Fax: +86-21-64085875  
42

43  
44 Email: kuangli0308@163.com  
45  
46

47 **Running title:** Isotretinoin and risk of depression in patients with acne  
48  
49  
50  
51  
52  
53  
54  
55  
56  
57



## ABSTRACT

**Objective:** This study aimed to investigate the association between the use of isotretinoin and the risk of depression in patients with acne.

**Design:** This was a meta-analysis in which the standardized mean difference (SMD) and the relative risk (RR) were used for data synthesis employed the random-effects model.

**Setting:** Studies were identified via electronic searches of PubMed, Embase, and the Cochrane Library up to December 28, 2017.

**Participants:** Patients with acne.

**Interventions:** Studies comparing isotretinoin with other interventions in patients with acne were included.

**Results:** Twenty studies were selected. The analysis of 17 studies showed a significant association of the use of isotretinoin with improved symptoms compared with the baseline before treatment [SMD = -0.33, 95% confidence interval (CI) -0.51 to -0.15,  $P < 0.05$ ;  $I^2 = 76.6\%$ ,  $P < 0.05$ ]. Four studies were related to the analysis of the risk of depression. The pooled data indicated no association of the use of isotretinoin with the risk of depressive disorders (RR = 1.15, 95% CI 0.60–2.21,  $P = 0.14$ ). The association of the use of isotretinoin with the risk of depressive disorders was statistically significant on pooling retrospective studies (RR = 1.39, 95% CI 1.05–1.84,  $P = 0.02$ ), but this association was not evident on pooling prospective studies (RR = 0.85, 95% CI 0.60–2.21,  $P = 0.86$ ).

1  
2  
3  
4 **Conclusions:** This study suggested an association of the use of isotretinoin in patients with  
5  
6 acne with significantly improved depression symptoms. Future randomized controlled trials  
7  
8 are needed to verify the present findings.  
9

#### 10 11 12 13 **Strengths and limitations of this study**

- 14  
15  
16 1. Most included studies were prospectively designed, and the quality of included studies  
17  
18 was largely moderate to high.  
19  
20  
21 2. The heterogeneity was explored by sensitivity, subgroup, and meta-regression analyses.  
22  
23  
24 3. The small sample sizes of some included studies might have limited the statistical power  
25  
26 and increased the chance of missing small effects.  
27  
28  
29 4. No randomized controlled trial was available so far, which was a major drawback for  
30  
31 studies on this topic.  
32  
33  
34 5. The treatment duration, drug dose, and depression scale varied between different studies.  
35  
36  
37  
38

39 **Key words:** acne; depression; isotretinoin; meta-analysis  
40  
41  
42  
43  
44  
45  
46  
47  
48  
49  
50  
51  
52  
53  
54  
55  
56  
57  
58  
59  
60

## INTRODUCTION

Acne vulgaris is a chronic inflammatory disease of the pilosebaceous unit of the face, neck, chest, and back<sup>1</sup>. As a pleomorphic skin disease, it may present as noninflammatory lesions (open and closed comedones) or inflammatory lesions (papules, pustules, or nodules)<sup>2</sup>. It is the most common skin disease around the world, with an estimated prevalence of 70%–87%<sup>3</sup>. The economic burden of acne is substantial. The cost is estimated to exceed \$1 billion per year in the United States for direct acne therapy, with \$100 million spent on various acne products<sup>4</sup>. Acne vulgaris may cause cosmetic defects and significantly impact the quality of life<sup>5</sup>. It may provoke a wide range of mental problems, including depression, anxiety, poor self-esteem, social phobia, and even suicidal attempts<sup>6</sup>.

The optimal treatment approach depends on the morphology and severity of acne. Mild cases are suggested to be treated with topical retinoids. For moderate cases, systemic drugs are always needed, including oral antibiotics, hormonal therapy, and oral retinoids. However, for severe or resistant moderate acne, isotretinoin is the treatment of choice<sup>1,2,4,7</sup>. Isotretinoin is a vitamin A-derivative 13-*cis*-retinoic acid, which is the most effective therapy for acne to date. It targets all four processes during acne development, including normalization of follicular desquamation, reduction of sebaceous gland activity, inhibition of the proliferation of *Propionibacterium acnes*, and anti-inflammatory effects<sup>2,7,8</sup>. The meta-analysis suggested that isotretinoin cured around 85% of patients after an average treatment course of 4 months<sup>9</sup>.

1  
2  
3 Depressive disorders are highly prevalent in the Western world. The lifetime prevalence of  
4  
5  
6 major depressive disorders in the United States and Western Europe is around 13%–16%<sup>10</sup>.  
7  
8  
9 The frequency of depressive disorders during the use of isotretinoin varies from 1% to 11%  
10  
11<sup>11</sup>. Theoretically, effective treatment may lead to an improvement in depressive symptoms  
12  
13 of patients with acne. However, the use of systemic isotretinoin itself may potentially  
14  
15 increase the risk of depression<sup>12</sup>. Experimental studies showed that isotretinoin could affect  
16  
17 the central nervous system and was involved in the pathogenesis of depression<sup>13</sup>. However,  
18  
19 some researchers disputed that the risk was extremely small and might be influenced by the  
20  
21 background risk or nondrug confounding factors<sup>12</sup>. The evidence for this controversy  
22  
23 remained incomplete and unclear. Therefore, this systematic review and meta-analysis was  
24  
25 performed to explore the association between the use of isotretinoin and the risk of  
26  
27 depression among patients with acne. Further, whether this relationship differed in patients  
28  
29 with specific characteristics was also explored.  
30  
31  
32  
33  
34  
35  
36  
37  
38  
39

## 40 **METHODS**

### 41 **Literature search**

42  
43 The Preferred Reporting Items for Systematic Reviews and Meta-Analyses guideline was  
44  
45 followed to conduct this meta-analysis<sup>14</sup>. A literature search up to December 28, 2017, was  
46  
47 performed using PubMed, Embase, and the Cochrane Library. The following groups of  
48  
49 keywords were used in the search: (“depression” OR “depressive”) AND “acne” AND  
50  
51 “isotretinoin.” The details of searching strategy in PubMed are presented in Supplemental 1.  
52  
53  
54  
55  
56

1  
2  
3 Also, a manual search of references listed in included studies and published reviews were  
4  
5  
6 also performed to search for potentially eligible studies. The language was restricted to  
7  
8  
9 English.

### 10 11 **Selection criteria**

12  
13 Studies were included if they fulfilled the following criteria: (1) being randomized  
14  
15 controlled trial (RCT), prospective or retrospective study, nested case-control study, or  
16  
17 population-based case-control study; (2) comparing the outcomes before and after the use  
18  
19 of isotretinoin in patients with acne; or comparing isotretinoin with other treatment  
20  
21 regimens in patients with acne; (3) presenting the change in depressive symptoms measured  
22  
23 using a continuous depression scale<sup>15</sup>; or reporting the number of depressive patients before  
24  
25 and after the use of isotretinoin; or directly presenting the relative risk (RR), odds ratio  
26  
27 (OR), or hazard ratio (HR) between the use of isotretinoin and the risk of depression.  
28  
29  
30  
31  
32  
33

### 34 **Data extraction and quality assessment**

35  
36 Two authors independently assessed the titles and abstracts for eligibility and extracted data  
37  
38 in standardized electronic tables. The following data were extracted from included studies:  
39  
40 publication year, author, study design, sample size, participant sex and age, severity of acne,  
41  
42 compared groups, dose and duration of isotretinoin, and depression assessment tool. The  
43  
44 quality of included studies was assessed using the 9-star Newcastle-Ottawa Scale. This  
45  
46 scale evaluated the study quality based on three parameters: selection, comparability, and  
47  
48 exposure (case-control study) or outcome (cohort study). A maximum of 4 points was  
49  
50 assigned for the item of selection, 2 points for comparability, and 3 points for  
51  
52  
53  
54  
55  
56  
57  
58  
59  
60

1  
2  
3 exposure/outcome <sup>16</sup>. Studies were deemed as high quality for a score of 8–9, moderate  
4 quality for a score of 6–7, and low quality for a score  $\leq 5$ .  
5  
6  
7

### 8 **Statistical analysis**

9  
10 The continuous outcome of interest was the alteration in depressive symptoms assessed  
11 using a continuous depression scale after the use of isotretinoin. For the continuous  
12 parameter of depression score, the means and standard differences (SD) of the scores were  
13 extracted. The standard mean difference (SMD) was used as the outcome measure. The  
14 SMD was a unitless effect size estimate, which was the mean difference in the depression  
15 score between the compared groups divided by the pooled SD of the distribution of the  
16 score used in the study. The conversion of median (range/interquartile range) to mean  $\pm$  SD  
17 was done by a previously proposed method <sup>17</sup>. The binary outcome of interest was the  
18 number of participants whose conditions were regarded as depression. RR and its  
19 corresponding 95% confidence interval (CI) were used as the outcome measure. HR was  
20 regarded as equivalent to RR in cohort studies. Given the overall low incidence of  
21 depression among the general population, OR was assumed to be an accurate estimate of  
22 RR. It was preferred to use the effect measures that reflected the greatest degree control for  
23 confounding factors. Both adjusted and crude data were analyzed. When data on different  
24 subgroups were reported by the same cohort, they were first pooled using the fixed-effects  
25 model. As the random-effects model was more robust than the fixed-effects model, the  
26 DerSimonian–Laird random-effects model was used to calculate the overall effect estimates  
27 for the association between the use of isotretinoin and the risk of depression <sup>18</sup>. The  
28  
29  
30  
31  
32  
33  
34  
35  
36  
37  
38  
39  
40  
41  
42  
43  
44  
45  
46  
47  
48  
49  
50  
51  
52  
53  
54  
55  
56  
57  
58  
59  
60

1  
2  
3 heterogeneity was evaluated using the Cochran Q test and the  $I^2$  statistic. Heterogeneity  
4 was considered low, moderate, or high for  $I^2 < 25\%$ ,  $25\%–50\%$ , and  $>50\%$ , respectively<sup>19,20</sup>.  
5  
6 Subgroup analyses were conducted based on the following confounders: region, study  
7  
8 design, sample size, female percentage, and depression scale. Furthermore, meta-regression  
9  
10 analyses were performed for the continuous confounders of sample size and female  
11  
12 percentage. A sensitivity analysis was conducted by excluding a single study at a time. Also,  
13  
14 a sensitivity analysis was conducted using the weighted mean difference (WMD) as the  
15  
16 effect estimate for studies employing the same depression symptom scale. The publication  
17  
18 bias was visually assessed by constructing a funnel plot and statistically assessed using the  
19  
20 Begg's and Egger's regression asymmetry tests<sup>21,22</sup>. All statistical analyses were conducted  
21  
22 using the software Stata 12.0 (StataCorp, TX, USA). A *P* value less than 0.05 was  
23  
24 considered statistically significant.  
25  
26  
27  
28  
29  
30  
31  
32

### 33 34 **Patient and public involvement statement**

35  
36 Patients and the public were not involved  
37  
38  
39  
40  
41

## 42 **RESULTS**

### 43 44 **Study selection**

45  
46 A total of 632 records were retrieved from the electronic search, including 145 studies from  
47  
48 PubMed, 469 records from Embase, and 18 records from the Cochrane Library. After  
49  
50 screening by titles and abstracts, 571 studies were excluded for the following reasons:  
51  
52 reviews, editorials, case reports, or irrelevant studies, leaving 61 studies for full-text review.  
53  
54  
55  
56  
57

1  
2  
3  
4 Nine cross-sectional studies, 19 studies without sufficient data, and 13 review, editorial, or  
5  
6 comments were excluded. Finally, 20 studies were pooled into the meta-analysis<sup>23-43</sup>. A  
7  
8 flow diagram of the study selection process is depicted in Figure 1.  
9

### 10 11 **Study characteristics**

12  
13 The characteristics of the included 20 studies are shown in Table 1. Jick et al. reported two  
14  
15 independent cohorts<sup>24</sup>, which were analyzed separately. Except for two retrospective  
16  
17 studies identifying depressive patients using the International Classification of Diseases  
18  
19 code<sup>24, 31</sup>, other studies were prospectively designed, and depression was assessed using  
20  
21 depression symptom scales. The number of participants using isotretinoin ranged from 16 to  
22  
23 7195. The enrolled patients with acne were distributed around the world, including 14  
24  
25 cohorts from Europe, 3 from North America, 3 from Asia, and 1 from Africa. The  
26  
27 percentage of female patients ranged from 0% to 73%. Most studies compared data before  
28  
29 and after the use of isotretinoin, except for two studies. Simic et al. compared isotretinoin  
30  
31 with vitamin C<sup>35</sup>. Azoulay et al. compared isotretinoin users with nonusers<sup>31</sup>. Most studies  
32  
33 prescribed isotretinoin for moderate-to-severe acne. The dose of isotretinoin ranged largely  
34  
35 from 0.5 to 1.0 mg/(kg · d). The duration of the use of isotretinoin ranged from around 1  
36  
37 month to about half a year. The quality of included studies is shown in Supplemental 2.  
38  
39 Most studies had satisfactorily high quality. The least satisfactory item was the adjustment  
40  
41 of the confounding factors.  
42  
43  
44  
45  
46  
47  
48  
49  
50

### 51 52 **Change in depression symptom scores after treatment**



1  
2  
3  
4 Seventeen studies reported the depression symptom scores before and after the use of  
5  
6 isotretinoin. All studies were prospectively designed. Simic et al. (2009) presented data for  
7  
8 moderate and severe acne<sup>35</sup>. Fakour et al. showed data for males and females separately<sup>37</sup>.  
9  
10  
11 Kaymak et al. reported depression scores measured using Beck Depression Inventory (BDI)  
12  
13 and hospital anxiety and depression scale-depression (HADS-D) scales<sup>33</sup>. These subgroup  
14  
15 data were all pooled into the overall analysis. Compared with the baseline condition before  
16  
17 therapy, the use of isotretinoin was associated with a significant improvement in depressive  
18  
19 symptoms (SMD = -0.33, 95% CI -0.51 to -0.15,  $P < 0.05$ ) (Fig. 2). Highly significant  
20  
21 heterogeneity was revealed ( $I^2 = 76.6%$ ,  $P < 0.05$ ).  
22  
23  
24

25  
26 In the sensitivity analysis, the overall effect was not substantially altered when excluding  
27  
28 any single study. In the meta-regression analysis, the number of included participants ( $P =$   
29  
30 0.995) and the female proportion ( $P = 0.56$ ) did not account for the source of heterogeneity.  
31  
32  
33 Data on subgroup analyses are shown in Table 2. The pooled effect estimate remained  
34  
35 significant for 14 European studies (SMD = -0.35, 95% CI -0.51 to -0.19,  $P < 0.05$ ), with  
36  
37 moderate heterogeneity ( $I^2 = 46.3%$ ). However, the analysis of three Asian studies did not  
38  
39 show significant results (SMD = -0.18, 95% CI -0.81 to 0.45,  $P = 0.57$ ;  $I^2 = 94.4%$ ). The  
40  
41 use of isotretinoin had no significant effect on depressive symptoms in North America  
42  
43 (SMD = -0.23, 95% CI -0.59 to 0.13;  $P = 0.21$ ), while it was associated with improved  
44  
45 depressive symptoms in Africa (SMD = -0.74, 95% CI -1.22 to -0.26,  $P < 0.05$ ). The  
46  
47 pooled results remained significant for studies using HADS-D (SMD = -0.57, 95% CI  
48  
49 -0.83 to -0.31,  $P < 0.25$ ;  $I^2 = 27.2%$ ), and those using the Center for Epidemiological  
50  
51  
52  
53  
54  
55  
56  
57  
58  
59  
60

1  
2  
3  
4  
5  
6  
7  
8  
9  
10  
11  
12  
13  
14  
15  
16  
17  
18  
19  
20  
21  
22  
23  
24  
25  
26  
27  
28  
29  
30  
31  
32  
33  
34  
35  
36  
37  
38  
39  
40  
41  
42  
43  
44  
45  
46  
47  
48  
49  
50  
51  
52  
53  
54  
55  
56  
57  
58  
59  
60

Studies Depression scale (CES-D) (SMD = -0.27, 95% CI -0.52 to -0.02,  $P < 0.05$ ;  $I^2 = 0\%$ ). However, the pooled effect turned to be nonsignificant for studies using the BDI scale (SMD = -0.15, 95% CI -0.36 to 0.06,  $P = 0.17$ ;  $I^2 = 62.4\%$ ) and those using the Hamilton Rating Scale (HRS) (SMD = -0.55, 95% CI -1.56 to 0.46,  $P = 0.29$ ;  $I^2 = 96.6\%$ ). The pooled effects were significant for both studies with a smaller sample size (SMD = -0.38, 95% CI -0.65 to -0.12,  $P < 0.05$ ) and those with a larger sample size (SMD = -0.29, 95% CI -0.54 to -0.04,  $P < 0.05$ ). The results for different proportions of females did not show a significant difference. The funnel plot appeared to be symmetrical (Fig. 3). No publication bias was revealed using the Egger's test ( $P = 0.76$ ) or the Begg's test ( $P = 0.87$ ).

Also, the sensitivity analysis was performed by pooling the WMD for studies using the same scale. The pooled results were nonsignificant for studies using the BDI scale (WMD = -0.84, 95% CI -2.05 to 0.38,  $P = 0.18$ ;  $I^2 = 62.2\%$ ,  $P < 0.05$ ) (Fig. 4) and those using HRS (WMD = -1.91, 95% CI -5.44 to 1.63,  $P = 0.29$ ;  $I^2 = 97.3\%$ ,  $P < 0.05$ ). In contrast, the pooled WMDs were significant for studies using HADS-D (WMD = -2.06, 95% CI -3.42 to -0.70,  $P < 0.05$ ;  $I^2 = 66.0\%$ ,  $P < 0.05$ ) and those using CES-D (WMD = -1.88, 95% CI -3.64 to -0.11,  $P < 0.05$ ;  $I^2 = 0\%$ ,  $P = 0.63$ ).

### **Use of isotretinoin and risk of depression**

Two retrospective studies showed the adjusted RR for the association between the use of isotretinoin and the risk of depression<sup>24, 31</sup>. Jick et al. presented data for two independent cohorts. The overall result of three cohorts showed that the use of isotretinoin was associated with an increased risk of depression (RR = 1.39, 95% CI 1.05–1.84,  $P = 0.02$ ;

1  
2  
3  
4 Fig. 5), and no significant heterogeneity was shown ( $I^2 = 0.0\%$ ,  $P = 0.50$ ). However, no  
5  
6 significant difference was noted in the relationship between isotretinoin use and the risk of  
7  
8 depression on pooling two prospective studies (RR = 0.85, 95% CI 0.60–2.21,  $P = 0.86$ ; Fig.  
9  
10 5), and a substantial heterogeneity was observed ( $I^2 = 61.4\%$ ,  $P = 0.11$ ). The funnel plot  
11  
12 appeared to be symmetrical (Fig. 6), and the Egger's test ( $P = 0.76$ ) or the Begg's test ( $P =$   
13  
14 1.00) suggested no evidence of potential publication bias.  
15  
16  
17  
18  
19  
20

## 21 DISCUSSION

22  
23  
24 The risk of depression associated with the use of isotretinoin in patients with acne has been  
25  
26 a major concern for a long time. Previous data showed conflicting and inconsistent results.  
27  
28

29 This meta-analysis assessed the association between the use of isotretinoin and the risk of  
30  
31 depression. It had several strengths as follows. A comprehensive database search of  
32  
33 worldwide cohorts was conducted, enrolling a large number of participants. The quality of  
34  
35 included studies was largely moderate to high. Most included studies were prospectively  
36  
37 designed. The association was investigated from several aspects. The heterogeneity was  
38  
39 explored by sensitivity, subgroup, and meta-regression analyses. The present findings  
40  
41 showed that isotretinoin improved in depressive symptoms in patients with acne. The  
42  
43 benefit remained marked for studies using HADS-D and CES-D. In risk assessment, the  
44  
45 summary RR showed that the use of isotretinoin was associated with an increased risk of  
46  
47 depression in patients with acne on pooling retrospective studies, while this significant  
48  
49 difference was not observed on pooling prospective studies.  
50  
51  
52  
53  
54  
55  
56  
57  
58  
59  
60

1  
2  
3  
4 Two previous systematic reviews on this topic were identified<sup>13,44</sup>. They showed conflicting  
5  
6 results, and hence the association between isotretinoin use and depression remained  
7  
8 controversial. Further, although comprehensive scenarios were presented, data synthesis to  
9  
10 obtain pooled results could not be conducted. Vallerand conducted a systematic review based  
11  
12 on 11 trials to evaluate the efficacy and safety of oral isotretinoin for acne. Oral isotretinoin  
13  
14 significantly reduced the counts of acne lesions but increased the frequency of psychiatric  
15  
16 adverse events (depressed mood, fatigue, hallucination, insomnia, and lethargy; 32 vs 19).  
17  
18 However, this study did not provide the result by data synthesis<sup>45</sup>. Further, Huang et al  
19  
20 conducted a meta-analysis based on 31 studies and suggested that the use of isotretinoin did  
21  
22 not affect the incidence of depression. Further, they showed that the treatment of acne could  
23  
24 ameliorate depressive symptoms. However, the study summarized the investigated outcomes  
25  
26 using the depression assessment tool. Whether these relationships differed according to the  
27  
28 region, study design, sample size, and the female percentage was not illustrated<sup>46</sup>. Therefore,  
29  
30 the present study was conducted to evaluate any potential impact of the use of isotretinoin on  
31  
32 depression incidence and change in the depression score.  
33  
34  
35  
36  
37  
38  
39  
40

41  
42 The concern for negative mood arose from a series of experimental studies. Oral isotretinoin  
43  
44 significantly suppressed cell division in the hippocampus and severely disrupted the  
45  
46 learning capacity of mice<sup>47</sup>. Bremner et al. found that the use of isotretinoin, but not  
47  
48 antibiotics, was associated with decreased brain metabolism in the orbitofrontal cortex,  
49  
50 which was known to mediate depression symptoms<sup>48</sup>. O'Reilly et al. proved that  
51  
52 isotretinoin altered intracellular serotonin level and increased 5-HT1A receptor and  
53  
54  
55  
56  
57  
58  
59  
60

1  
2  
3 serotonin reuptake transporter levels *in vitro*<sup>49</sup>. Thus, theoretically, isotretinoin itself might  
4  
5  
6 cause depressive disorders. However, the potentially increased risk of depression could be  
7  
8  
9 compensated by the beneficial effects of isotretinoin on patients with acne. Most patients  
10  
11 with acne were worried about their appearances, which might lead to a series of  
12  
13 psychological disorders. It was inferred that the improvement in depression symptoms after  
14  
15 the use of isotretinoin might be attributed to the treatment success. Also, isotretinoin had a  
16  
17 gradual effect on mood over time, which was not an acute event<sup>50</sup>.

21 Of note, the controversy over this topic was complicated by various confounding  
22  
23 psychosocial and clinical factors. Aktan et al. suggested that adolescent girls were more  
24  
25 vulnerable to the negative psychological effects of acne compared with boys<sup>51</sup>. Women  
26  
27 with acne were significantly more embarrassed about their skin disease compared with  
28  
29 males. A large database study showed that female gender and acne could jointly increase  
30  
31 the risk of depression<sup>52</sup>. However, the role of gender was not revealed in meta-regression  
32  
33 and subgroup analyses. Acne itself can exert different impacts on individual patients. The  
34  
35 lack of knowledge, especially about prognosis, may be a source of depression<sup>24, 53</sup>.  
36  
37 Approximately one fifth of patients with acne suffered from psychiatric disorders<sup>33</sup>. Better  
38  
39 health education and care are important components for treating patients with acne. They  
40  
41 help eliminate the patients' misconceptions about the disease and unrealistic treatment  
42  
43 expectations<sup>54</sup>. The psychological interventions may vary between different clinical  
44  
45 settings and lead to a bias in the effect of isotretinoin. Besides, data on the efficacy or side  
46  
47 effect of the use of isotretinoin were insufficient in most included studies. Isotretinoin may  
48  
49  
50  
51  
52  
53  
54  
55  
56  
57  
58  
59  
60

1  
2  
3  
4 cause teratogenic toxicity. Contraceptives are recommended for female users of fertile age  
5  
6 to prevent pregnancy until the completion of the treatment <sup>41</sup>. The levels of blood  
7  
8 cholesterol and liver enzymes may be abnormal and should be monitored during the  
9  
10 treatment phase <sup>55</sup>.

11  
12  
13 This meta-analysis had several shortcomings. The sample sizes of some included studies  
14  
15 were still small, which might have limited the statistical power and increased the chance of  
16  
17 missing small effects. Cohort studies might have a bias caused by participant selection and  
18  
19 confounding factors. Most studies compared the before- and after-treatment data. Ideally,  
20  
21 RCTs comparing isotretinoin with placebo or other agents may provide more robust  
22  
23 findings. However, leaving patients with moderate-to-severe acne without the use of  
24  
25 isotretinoin may be unfair and even not ethical. However, no RCT was available so far,  
26  
27 which was a major drawback for studies on this topic. Additionally, the treatment duration,  
28  
29 drug dose, and depression scale varied between different studies. The acne severity or the  
30  
31 dose of isotretinoin varied and was not reported by several studies. Patients with severe  
32  
33 acne or scars or those unresponsive to therapy might have a worse depressive mood.  
34  
35 However, the analyses for these confounding factors were insufficient in most studies.  
36  
37  
38  
39  
40  
41  
42  
43  
44 Approximately one fifth of patients with acne suffered from psychiatric disorders <sup>33</sup>. Also,  
45  
46 some studies were sponsored by corporations <sup>24</sup>, which might have underestimated the  
47  
48 incidence of depressive disorders. Finally, although a greater risk of depression was  
49  
50 associated with the use of isotretinoin on pooling retrospective studies, selection and recall  
51  
52  
53  
54  
55  
56  
57  
58  
59  
60

1  
2  
3 biases might have affected the incidence of depression. Further, these conclusions might be  
4  
5  
6 unreliable because smaller cohorts were included in such subsets.  
7

8  
9 This meta-analysis showed that patients might have improved depressive symptoms after  
10  
11 the use of isotretinoin. Further, the use of isotretinoin in patients with acne did not  
12  
13 contribute to the development of depression. However, the summary results of retrospective  
14  
15 studies suggested that the use of isotretinoin in patients with acne might increase the risk of  
16  
17 depression. Future prospective controlled trials are warranted to verify the present findings.  
18  
19  
20  
21  
22  
23

#### 24 **Funding**

25  
26 Not applicable.  
27  
28  
29  
30

#### 31 **Conflicts of interest statement**

32  
33 Not declared.  
34  
35  
36  
37  
38

#### 39 **Author contributions**

40  
41 CQL and LK contributed to conception and design. CQL, JMC, WW, MA, QZ, and LK  
42  
43 contributed to data acquisition or analysis and interpretation of data. CQL, JMC, WW, MA,  
44  
45 QZ, and LK were involved in drafting the manuscript or revising it critically for important  
46  
47 intellectual content. All authors have given final approval of the version to be published.  
48  
49  
50  
51  
52  
53

#### 54 **Data sharing statement**

1  
2  
3  
4  
5  
6  
7  
8  
9  
10  
11  
12  
13  
14  
15  
16  
17  
18  
19  
20  
21  
22  
23  
24  
25  
26  
27  
28  
29  
30  
31  
32  
33  
34  
35  
36  
37  
38  
39  
40  
41  
42  
43  
44  
45  
46  
47  
48  
49  
50  
51  
52  
53  
54  
55  
56  
57  
58  
59  
60

No additional data are available.

For peer review only



**REFERENCES**

- 1 Williams HC, Dellavalle RP, Garner S. Acne vulgaris. *Lancet* 2012;**379**:361-72.
- 2 Katsambas AD, Stefanaki C, Cunliffe WJ. Guidelines for treating acne. *Clin Dermatol* 2004;**22**:439-44.
- 3 Dreno B, Poli F. Epidemiology of acne. *Dermatology* 2003;**206**:7-10.
- 4 James WD. Clinical practice. Acne. *N Engl J Med* 2005;**352**:1463-72.
- 5 Thomas DR. Psychosocial effects of acne. *J Cutan Med Surg* 2004;**8 Suppl 4**:3-5.
- 6 Saitta P, Keehan P, Yousif J, et al. An update on the presence of psychiatric comorbidities in acne patients, Part 2: Depression, anxiety, and suicide. *Cutis* 2011;**88**:92-7.
- 7 Dawson AL, Dellavalle RP. Acne vulgaris. *BMJ* 2013;**346**:f2634.
- 8 Chivot M. Retinoid therapy for acne. A comparative review. *Am J Clin Dermatol* 2005;**6**:13-9.
- 9 Wessels F, Anderson AN, Kropman K. The cost-effectiveness of isotretinoin in the treatment of acne. Part 1. A meta-analysis of effectiveness literature. *S Afr Med J* 1999;**89**:780-4.
- 10 Kurek A, Johanne Peters EM, Sabat R, et al. Depression is a frequent co-morbidity in patients with acne inversa. *J Dtsch Dermatol Ges* 2013;**11**:743-9, 43-50.
- 11 Borovaya A, Olisova O, Ruzicka T, et al. Does isotretinoin therapy of acne cure or cause depression? *Int J Dermatol* 2013;**52**:1040-52.
- 12 Wolverton SE, Harper JC. Important controversies associated with isotretinoin therapy for acne. *Am J Clin Dermatol* 2013;**14**:71-6.

- 1  
2  
3  
4 13 Kontaxakis VP, Skourides D, Ferentinos P, et al. Isotretinoin and psychopathology: a  
5  
6 review. *Ann Gen Psychiatry* 2009;**8**:2.  
7  
8  
9 14 Moher D, Liberati A, Tetzlaff J, et al. Preferred reporting items for systematic reviews  
10  
11 and meta-analyses: the PRISMA statement. *PLoS Med* 2009;**6**:e1000097.  
12  
13  
14 15 Smarr KL, Keefer AL. Measures of depression and depressive symptoms: Beck  
15  
16 Depression Inventory-II (BDI-II), Center for Epidemiologic Studies Depression Scale  
17  
18 (CES-D), Geriatric Depression Scale (GDS), Hospital Anxiety and Depression Scale  
19  
20 (HADS), and Patient Health Questionnaire-9 (PHQ-9). *Arthritis Care Res (Hoboken)*  
21  
22 2011;**63 Suppl 11**:S454-66.  
23  
24  
25  
26 16 Wells GA, Shea B, O'Connell D, et al. The Newcastle-Ottawa Scale (NOS) for assessing  
27  
28 the quality of nonrandomised studies in meta-analyses.  
29  
30 [http://www.ohrica/programs/clinical\\_epidemiology/oxfordasp](http://www.ohrica/programs/clinical_epidemiology/oxfordasp)  
31  
32  
33  
34 17 Wan X, Wang W, Liu J, et al. Estimating the sample mean and standard deviation from  
35  
36 the sample size, median, range and/or interquartile range. *BMC Med Res Methodol*  
37  
38 2014;**14**:135.  
39  
40  
41  
42 18 DerSimonian R, Laird N. Meta-analysis in clinical trials. *Control Clin Trials*  
43  
44 1986;**7**:177-88.  
45  
46  
47 19 Higgins JP, Thompson SG, Deeks JJ, et al. Measuring inconsistency in meta-analyses.  
48  
49 *BMJ* 2003;**327**:557-60.  
50  
51  
52 20 Higgins JP, Thompson SG. Quantifying heterogeneity in a meta-analysis. *Stat Med*  
53  
54 2002;**21**:1539-58.  
55  
56  
57  
58  
59  
60

- 1  
2  
3  
4 21 Begg CB, Mazumdar M. Operating characteristics of a rank correlation test for  
5  
6 publication bias. *Biometrics* 1994;**50**:1088-101.  
7  
8  
9 22 Egger M, Davey Smith G, Schneider M, et al. Bias in meta-analysis detected by a simple,  
10  
11 graphical test. *BMJ* 1997;**315**:629-34.  
12  
13  
14 23 Kellett SC, Gawkrödger DJ. The psychological and emotional impact of acne and the  
15  
16 effect of treatment with isotretinoin. *Br J Dermatol* 1999;**140**:273-82.  
17  
18  
19 24 Jick SS, Kremers HM, Vasilakis-Scaramozza C. Isotretinoin use and risk of depression,  
20  
21 psychotic symptoms, suicide, and attempted suicide. *Arch Dermatol* 2000;**136**:1231-6.  
22  
23  
24 25 Ng CH, Tam MM, Celi E, et al. Prospective study of depressive symptoms and quality of  
25  
26 life in acne vulgaris patients treated with isotretinoin compared to antibiotic and topical  
27  
28 therapy. *Australas J Dermatol* 2002;**43**:262-8.  
29  
30  
31 26 Ferahbas A, Turan MT, Esel E, et al. A pilot study evaluating anxiety and depressive  
32  
33 scores in acne patients treated with isotretinoin. *J Dermatolog Treat* 2004;**15**:153-7.  
34  
35  
36 27 Chia CY, Lane W, Chibnall J, et al. Isotretinoin therapy and mood changes in adolescents  
37  
38 with moderate to severe acne: a cohort study. *Arch Dermatol* 2005;**141**:557-60.  
39  
40  
41 28 Kellett SC, Gawkrödger DJ. A prospective study of the responsiveness of depression and  
42  
43 suicidal ideation in acne patients to different phases of isotretinoin therapy. *Eur J*  
44  
45 *Dermatol* 2005;**15**:484-8.  
46  
47  
48 29 Kaymak Y, Kalay M, Ilter N, et al. Incidence of depression related to isotretinoin  
49  
50 treatment in 100 acne vulgaris patients. *Psychol Rep* 2006;**99**:897-906.  
51  
52  
53 30 Cohen J, Adams S, Patten S. No association found between patients receiving  
54  
55  
56  
57  
58  
59  
60

- 1  
2  
3 isotretinoin for acne and the development of depression in a Canadian prospective  
4  
5 cohort. *Can J Clin Pharmacol* 2007;**14**:e227-33.  
6  
7
- 8  
9 31 Azoulay L, Blais L, Koren G, et al. Isotretinoin and the risk of depression in patients  
10  
11 with acne vulgaris: a case-crossover study. *J Clin Psychiatry* 2008;**69**:526-32.  
12
- 13  
14 32 Bozdag KE, Gulseren S, Guven F, et al. Evaluation of depressive symptoms in acne  
15  
16 patients treated with isotretinoin. *J Dermatolog Treat* 2009;**20**:293-6.  
17
- 18  
19 33 Kaymak Y, Taner E, Taner Y. Comparison of depression, anxiety and life quality in acne  
20  
21 vulgaris patients who were treated with either isotretinoin or topical agents. *Int J*  
22  
23 *Dermatol* 2009;**48**:41-6.  
24
- 25  
26 34 Rehn LM, Meririnne E, Hook-Nikanne J, et al. Depressive symptoms and suicidal  
27  
28 ideation during isotretinoin treatment: a 12-week follow-up study of male Finnish  
29  
30 military conscripts. *J Eur Acad Dermatol Venereol* 2009;**23**:1294-7.  
31
- 32  
33 35 Simic D, Situm M, Letica E, et al. Psychological impact of isotretinoin treatment in  
34  
35 patients with moderate and severe acne. *Coll Antropol* 2009;**33 Suppl 2**:15-9.  
36
- 37  
38 36 McGrath EJ, Lovell CR, Gillison F, et al. A prospective trial of the effects of isotretinoin  
39  
40 on quality of life and depressive symptoms. *Br J Dermatol* 2010;**163**:1323-9.  
41
- 42  
43 37 Fakour Y, Noormohammadpour P, Ameri H, et al. The effect of isotretinoin (roaccutane)  
44  
45 therapy on depression and quality of life of patients with severe acne. *Iran J Psychiatry*  
46  
47 2014;**9**:237-40.  
48
- 49  
50 38 Ergun T, Seckin D, Ozaydin N, et al. Isotretinoin has no negative effect on attention,  
51  
52 executive function and mood. *J Eur Acad Dermatol Venereol* 2012;**26**:431-9.  
53  
54  
55  
56  
57

- 1  
2  
3  
4 39 Ormerod AD, Thind CK, Rice SA, et al. Influence of isotretinoin on hippocampal-based  
5  
6 learning in human subjects. *Psychopharmacology (Berl)* 2012;**221**:667-74.  
7  
8  
9 40 Yesilova Y, Bez Y, Ari M, et al. Effects of isotretinoin on obsessive compulsive  
10  
11 symptoms, depression, and anxiety in patients with acne vulgaris. *J Dermatolog Treat*  
12  
13 2012;**23**:268-71.  
14  
15  
16 41 Marron SE, Tomas-Aragones L, Boira S. Anxiety, depression, quality of life and patient  
17  
18 satisfaction in acne patients treated with oral isotretinoin. *Acta Derm Venereol*  
19  
20 2013;**93**:701-6.  
21  
22  
23 42 Gnanaraj P, Karthikeyan S, Narasimhan M, et al. Decrease in "Hamilton Rating Scale for  
24  
25 Depression" Following Isotretinoin Therapy in Acne: An Open-Label Prospective  
26  
27 Study. *Indian J Dermatol* 2015;**60**:461-4.  
28  
29  
30  
31 43 Suarez B, Serrano A, Cova Y, et al. Isotretinoin was not associated with depression or  
32  
33 anxiety: A twelve-week study. *World J Psychiatry* 2016;**6**:136-42.  
34  
35  
36  
37 44 Marqueling AL, Zane LT. Depression and suicidal behavior in acne patients treated with  
38  
39 isotretinoin: a systematic review. *Semin Cutan Med Surg* 2007;**26**:210-20.  
40  
41  
42 45 Vallerand IA, Lewinson RT. Efficacy and adverse events of oral isotretinoin for acne: a  
43  
44 systematic review. 2017;  
45  
46  
47 46 Huang YC, Cheng YC. Isotretinoin treatment for acne and risk of depression: A  
48  
49 systematic review and meta-analysis. *J Am Acad Dermatol* 2017;**76**:1068-76.e9.  
50  
51  
52 47 Crandall J, Sakai Y, Zhang J, et al. 13-cis-retinoic acid suppresses hippocampal cell  
53  
54 division and hippocampal-dependent learning in mice. *Proc Natl Acad Sci U S A*  
55  
56

- 1  
2  
3  
4 2004;**101**:5111-6.  
5  
6 48 Bremner JD, Fani N, Ashraf A, et al. Functional brain imaging alterations in acne  
7  
8 patients treated with isotretinoin. *Am J Psychiatry* 2005;**162**:983-91.  
9  
10  
11 49 O'Reilly KC, Trent S, Bailey SJ, et al. 13-cis-Retinoic acid alters intracellular serotonin,  
12  
13 increases 5-HT1A receptor, and serotonin reuptake transporter levels in vitro. *Exp Biol*  
14  
15 *Med (Maywood)* 2007;**232**:1195-203.  
16  
17  
18 50 Misery L. Consequences of psychological distress in adolescents with acne. *J Invest*  
19  
20 *Dermatol* 2011;**131**:290-2.  
21  
22  
23 51 Aktan S, Ozmen E, Sanli B. Anxiety, depression, and nature of acne vulgaris in  
24  
25 adolescents. *Int J Dermatol* 2000;**39**:354-7.  
26  
27  
28 52 Yang YC, Tu HP, Hong CH. Female gender and acne disease are jointly and  
29  
30 independently associated with the risk of major depression and suicide: a national  
31  
32 population-based study. *BioMed Research International* 2014;**2014**:504279.  
33  
34  
35 53 Smithard A, Glazebrook C, Williams HC. Acne prevalence, knowledge about acne and  
36  
37 psychological morbidity in mid-adolescence: a community-based study. *Br J Dermatol*  
38  
39 2001;**145**:274-9.  
40  
41  
42  
43 54 Thiboutot D, Dreno B, Layton A. Acne counseling to improve adherence. *Cutis*  
44  
45 2008;**81**:81-6.  
46  
47  
48 55 Hansen TJ, Lucking S, Miller JJ, et al. Standardized laboratory monitoring with use of  
49  
50 isotretinoin in acne. *J Am Acad Dermatol* 2016;**75**:323-8.  
51  
52  
53  
54  
55  
56  
57  
58  
59  
60

**Table 1.** Characteristics of included studies

| Author (year)          | Region    | Design        | Isotretinoin users | Mean/Median age (year) | Female (%) | Acne severity      | Comparison groups | Dose                 | Treatment duration | Depression assessment |
|------------------------|-----------|---------------|--------------------|------------------------|------------|--------------------|-------------------|----------------------|--------------------|-----------------------|
| Kellett et al. (1999)  | UK        | Prospective   | 34                 | 24                     | 44         | NA                 | Before vs after   | 1.0 mg/(kg · d)      | 4 months           | HADS-D                |
| Lick et al. (2000) a   | Canada    | Retrospective | 7195               | <30 (75%)              | 47         | NA                 | Before vs after   | 40 mg (86%)          | 3–6 months (62%)   | ICD code              |
| Lick et al. (2000) b   | UK        | Retrospective | 340                | <30 (78%)              | 42         | NA                 | Before vs after   | 20 mg (75%)          | 1–2 months (81%)   | ICD code              |
| Ng et al. (2002)       | Australia | Prospective   | 174                | 20                     | 41         | Moderate to severe | Before vs after   | 0.8–1.0 mg/(kg · d)  | 6 months           | BDI                   |
| Perahbas et al. (2004) | Turkey    | Prospective   | 23                 | 20                     | 43         | Severe             | Before vs after   | 0.5–1.0 mg/(kg · d)  | 4 months           | MADRS                 |
| Kellett et al. (2005)  | UK        | Prospective   | 33                 | 25                     | 36         | NA                 | Before vs after   | 1.0 mg/(kg · d)      | 4 months           | BDI                   |
| Kaymak et al. (2006)   | Turkey    | Prospective   | 24                 | 100                    | 58         | Moderate           | Before vs after   | 0.75–1.0 mg/(kg · d) | 5–7 months         | HRS                   |
| Chia et al. (2005)     | USA       | Prospective   | 59                 | 12–19                  | 25         | Moderate to severe | Before vs after   | 1.0 mg/(kg · d)      | 3–4 months         | CES-D                 |

|    |                       |        |                        |               |     |    |    |                     |                           |                     |            |             |  |  |
|----|-----------------------|--------|------------------------|---------------|-----|----|----|---------------------|---------------------------|---------------------|------------|-------------|--|--|
| 1  |                       |        |                        |               |     |    |    |                     |                           |                     |            |             |  |  |
| 2  |                       |        |                        |               |     |    |    |                     |                           |                     |            |             |  |  |
| 3  |                       |        |                        |               |     |    |    |                     |                           |                     |            |             |  |  |
| 4  |                       |        |                        |               |     |    |    |                     |                           |                     |            |             |  |  |
| 5  |                       |        |                        |               |     |    |    |                     |                           |                     |            |             |  |  |
| 6  |                       |        |                        |               |     |    |    |                     |                           |                     |            |             |  |  |
| 7  | Azoulay               | et al. | Canada                 | Retrospective | 126 | 28 | 53 | NA                  | Users vs nonusers         | NA                  | 5 months   | ICD code    |  |  |
| 8  | (2008)                |        |                        | ve            |     |    |    |                     |                           |                     |            |             |  |  |
| 9  |                       |        |                        |               |     |    |    |                     |                           |                     |            |             |  |  |
| 10 | Kaymak                | et al. | Turkey                 | Prospective   | 37  | 21 | 69 | Mild to severe      | Before vs after           | 0.5–0.8 mg/(kg · d) | > 5 months | BDI, HADS-D |  |  |
| 11 | (2009)                |        |                        |               |     |    |    |                     |                           |                     |            |             |  |  |
| 12 |                       |        |                        |               |     |    |    |                     |                           |                     |            |             |  |  |
| 13 |                       |        |                        |               |     |    |    |                     |                           |                     |            |             |  |  |
| 14 | Bozdog                | et al. | Turkey                 | Prospective   | 50  | 20 | 52 | Moderate to severe  | Before vs after           | 1.0 mg/(kg · d)     | 4 months   | BDI         |  |  |
| 15 | (2009)                |        |                        |               |     |    |    |                     |                           |                     |            |             |  |  |
| 16 |                       |        |                        |               |     |    |    |                     |                           |                     |            |             |  |  |
| 17 | Behn et al. (2009)    |        | Finland                | Prospective   | 126 | 20 | 0  | Moderate to severe  | Before vs after           | 0.5 mg/(kg · d)     | 3 months   | BDI         |  |  |
| 18 |                       |        |                        |               |     |    |    |                     |                           |                     |            |             |  |  |
| 19 |                       |        |                        |               |     |    |    |                     |                           |                     |            |             |  |  |
| 20 |                       |        |                        |               |     |    |    |                     |                           |                     |            |             |  |  |
| 21 | Simic et al. (2009)   |        | Bosnia and Herzegovina | Prospective   | 85  | 19 | 34 | Moderate to severe  | Isotretinoin vs vitamin C | 1.0 mg/(kg · d)     | 2 months   | BDI         |  |  |
| 22 |                       |        |                        |               |     |    |    |                     |                           |                     |            |             |  |  |
| 23 |                       |        |                        |               |     |    |    |                     |                           |                     |            |             |  |  |
| 24 |                       |        |                        |               |     |    |    |                     |                           |                     |            |             |  |  |
| 25 |                       |        |                        |               |     |    |    |                     |                           |                     |            |             |  |  |
| 26 | McGrath et al. (2010) |        | UK                     | Prospective   | 65  | 20 | 31 | Mean AGS score 3.3  | Before vs after           | 0.5–1.0 mg/(kg · d) | 3 months   | CES-D       |  |  |
| 27 |                       |        |                        |               |     |    |    |                     |                           |                     |            |             |  |  |
| 28 |                       |        |                        |               |     |    |    |                     |                           |                     |            |             |  |  |
| 29 |                       |        |                        |               |     |    |    |                     |                           |                     |            |             |  |  |
| 30 |                       |        |                        |               |     |    |    |                     |                           |                     |            |             |  |  |
| 31 | Ergun et al. (2012)   |        | Turkey                 | Prospective   | 65  | 22 | 73 | Severe or resistant | Before vs after           | 0.5–1.0 mg/(kg · d) | ≈ 5 months | HADS-D      |  |  |
| 32 |                       |        |                        |               |     |    |    |                     |                           |                     |            |             |  |  |
| 33 |                       |        |                        |               |     |    |    |                     |                           |                     |            |             |  |  |
| 34 |                       |        |                        |               |     |    |    |                     |                           |                     |            |             |  |  |
| 35 | Ormerod et al. (2012) |        | UK                     | Prospective   | 16  | 22 | 25 | Severe              | Before vs after           | 0.5–1.0 mg/(kg · d) | 3–6 months | BDI         |  |  |
| 36 |                       |        |                        |               |     |    |    |                     |                           |                     |            |             |  |  |
| 37 |                       |        |                        |               |     |    |    |                     |                           |                     |            |             |  |  |
| 38 |                       |        |                        |               |     |    |    |                     |                           |                     |            |             |  |  |
| 39 |                       |        |                        |               |     |    |    |                     |                           |                     |            |             |  |  |
| 40 |                       |        |                        |               |     |    |    |                     |                           |                     |            |             |  |  |
| 41 |                       |        |                        |               |     |    |    |                     |                           |                     |            |             |  |  |
| 42 |                       |        |                        |               |     |    |    |                     |                           |                     |            |             |  |  |
| 43 |                       |        |                        |               |     |    |    |                     |                           |                     |            |             |  |  |
| 44 |                       |        |                        |               |     |    |    |                     |                           |                     |            |             |  |  |
| 45 |                       |        |                        |               |     |    |    |                     |                           |                     |            |             |  |  |
| 46 |                       |        |                        |               |     |    |    |                     |                           |                     |            |             |  |  |
| 47 |                       |        |                        |               |     |    |    |                     |                           |                     |            |             |  |  |



1  
2  
3  
4  
5  
6  
7  
8  
9  
10  
11  
12  
13  
14  
15  
16  
17  
18  
19  
20  
21  
22  
23

|                        |           |             |     |    |    |                    |                 |                     |          |        |
|------------------------|-----------|-------------|-----|----|----|--------------------|-----------------|---------------------|----------|--------|
| Yesilova et al. (2012) | Turkey    | Prospective | 43  | 23 | 70 | Mild to severe     | Before vs after | 0.5–1.0 mg/(kg · d) | 6 months | HADS-D |
| Marron et al. (2013)   | Spain     | Prospective | 346 | 21 | 59 | Moderate           | Before vs after | Total: 120 mg/kg    | 7 months | HADS-D |
| Fakour et al. (2014)   | Iran      | Prospective | 98  | 22 | 61 | Severe             | Before vs after | 0.5 mg/(kg · d)     | 4 months | BDI    |
| Gnanaraj et al. (2015) | India     | Prospective | 143 | 21 | 34 | Moderate to severe | Before vs after | 0.5 mg/(kg · d)     | 3 months | HRS    |
| Suarez et al. (2016)   | Venezuela | Prospective | 36  | 21 | 44 | Severe (25%)       | Before vs after | 30 mg/d             | 3 months | ZDS    |

24 AGS, Acne grading scale; BDI, Beck Depression Inventory; CES-D, Center for Epidemiologic Studies Depression Scale; HADS-D, hospital  
25 anxiety and depression scale-depression; HRS, Hamilton Rating Scale; ICD, International Classification of Diseases; MADRS, Montgomery–  
26 Asberg depression rating scale; NA, not available; ZDS, Zung self-rating depression scale.  
27  
28  
29  
30  
31  
32  
33  
34  
35  
36  
37  
38  
39  
40  
41  
42  
43  
44  
45  
46  
47

**Table 2.** Subgroup analysis for studies presenting depressive symptom scores after isotretinoin compared with the baseline

| Subgroups                            | Number of cohorts | SMD (95% CI)           | <i>P</i> value | <i>I</i> <sup>2</sup> ( <i>P</i> value) |
|--------------------------------------|-------------------|------------------------|----------------|-----------------------------------------|
| <b>Region</b>                        |                   |                        |                |                                         |
| Europe                               | 14                | -0.35 (-0.51 to -0.19) | <0.05          | 46.3% (<0.05)                           |
| Asia                                 | 3                 | -0.18 (-0.81 to 0.45)  | 0.57           | 94.4% (<0.05)                           |
| North America                        | 1                 | -0.23 (-0.59 to 0.13)  | 0.21           | –                                       |
| Africa                               | 1                 | -0.74 (-1.22 to -0.26) | <0.05          | –                                       |
| <b>Depression scale</b>              |                   |                        |                |                                         |
| BDI                                  | 10                | 0.10 (-0.12 to 0.32)   | 0.38           | 65.2% (<0.05)                           |
| HADS-D                               | 4                 | -0.57 (0.31–0.83)      | <0.05          | 27.2% (0.25)                            |
| CES-D                                | 2                 | 0.27 (0.02–0.52)       | <0.05          | 0% (0.78)                               |
| HRS                                  | 2                 | 0.55 (-0.46 to 1.56)   | 0.29           | 96.6% (<0.05)                           |
| MADRS                                | 1                 | 0.33 (-0.25 to 0.91)   | 0.27           | –                                       |
| ZDS                                  | 1                 | 0.74 (0.26–1.22)       | <0.05          | –                                       |
| <b>Sample size</b>                   |                   |                        |                |                                         |
| <50                                  | 9                 | -0.38 (-0.65 to -0.12) | <0.05          | 64.0% (<0.05)                           |
| ≥50                                  | 11                | -0.29 (-0.54 to -0.04) | <0.05          | 83.1% (<0.05)                           |
| <b>Percentage of female patients</b> |                   |                        |                |                                         |
| <50                                  | 12                | -0.32 (-0.55 to -0.09) | <0.05          | 76.8% (<0.05)                           |

1  
2  
3  $\geq 50$  8  $-0.34 (-0.04 \text{ to } -0.64)$   $<0.05$  78.4% ( $<0.05$ )  
4  
5

---

6 BDI, Beck Depression Inventory; CES-D, Center for Epidemiologic Studies Depression  
7 Scale; CI, confidence interval; HADS-D, hospital anxiety and depression scale-depression;  
8 HRS, Hamilton Rating Scale; MADRS, Montgomery–Asberg depression rating scale; SMD,  
9 standardized mean difference; ZDS, Zung self-rating depression scale.  
10  
11  
12  
13  
14  
15  
16  
17  
18  
19  
20  
21  
22  
23  
24  
25  
26  
27  
28  
29  
30  
31  
32  
33  
34  
35  
36  
37  
38  
39  
40  
41  
42  
43  
44  
45  
46  
47  
48  
49  
50  
51  
52  
53  
54  
55  
56  
57  
58  
59  
60

For peer review only

1  
2  
3  
4 **Figure legends:**  
5

6 **Figure 1.** Study selection process.  
7

8 **Figure 2.** Forest plot showing the standardized mean difference for the comparison of  
9 depression symptom scores before and after isotretinoin treatment in patients with acne.  
10  
11

12 **Figure 3.** Funnel plot of studies comparing depression symptom scores before and after  
13 isotretinoin treatment in patients with acne.  
14  
15

16 **Figure 4.** Forest plot showing the weighted mean difference for the comparison of BDI  
17 scores before and after isotretinoin treatment in patients with acne.  
18  
19

20 **Figure 5.** Forest plot showing the association between isotretinoin treatment and depression  
21 in patients with acne.  
22  
23

24 **Figure 6.** Funnel plot showing the association between isotretinoin treatment and  
25 depression in patients with acne.  
26  
27

28  
29  
30  
31  
32  
33  
34  
35  
36 **Legends for supporting information**

37  
38  
39 **Supplemental 1.** The details of searching strategy in PubMed.  
40

41  
42 **Supplemental 2.** Newcastle–Ottawa Scale for quality assessment of included studies  
43  
44  
45  
46  
47  
48  
49  
50  
51  
52  
53  
54  
55  
56  
57  
58  
59  
60

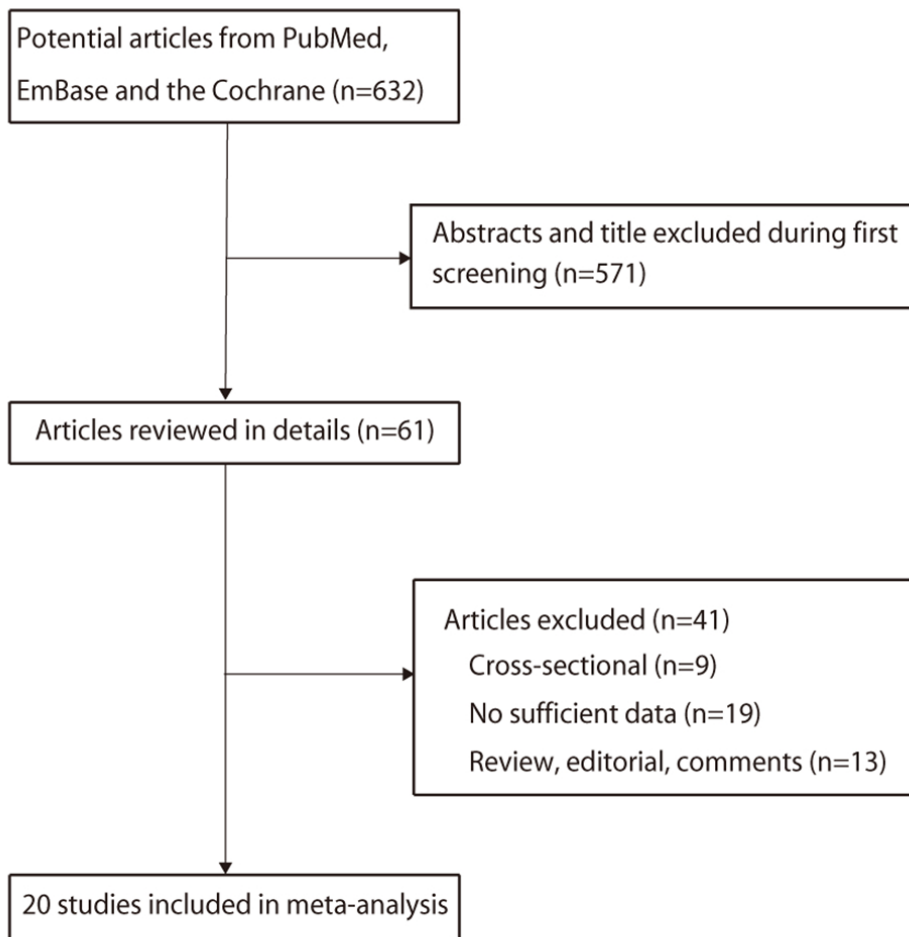

83x85mm (300 x 300 DPI)

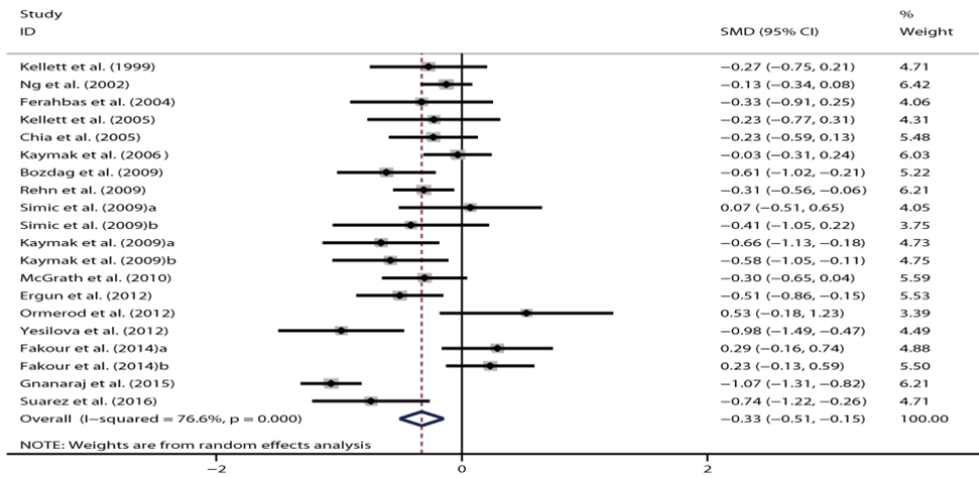

83x39mm (300 x 300 DPI)

1  
2  
3  
4  
5  
6  
7  
8  
9  
10  
11  
12  
13  
14  
15  
16  
17  
18  
19  
20  
21  
22  
23  
24  
25  
26  
27  
28  
29  
30  
31  
32  
33  
34  
35  
36  
37  
38  
39  
40  
41  
42  
43  
44  
45  
46  
47  
48  
49  
50  
51  
52  
53  
54  
55  
56  
57  
58  
59  
60

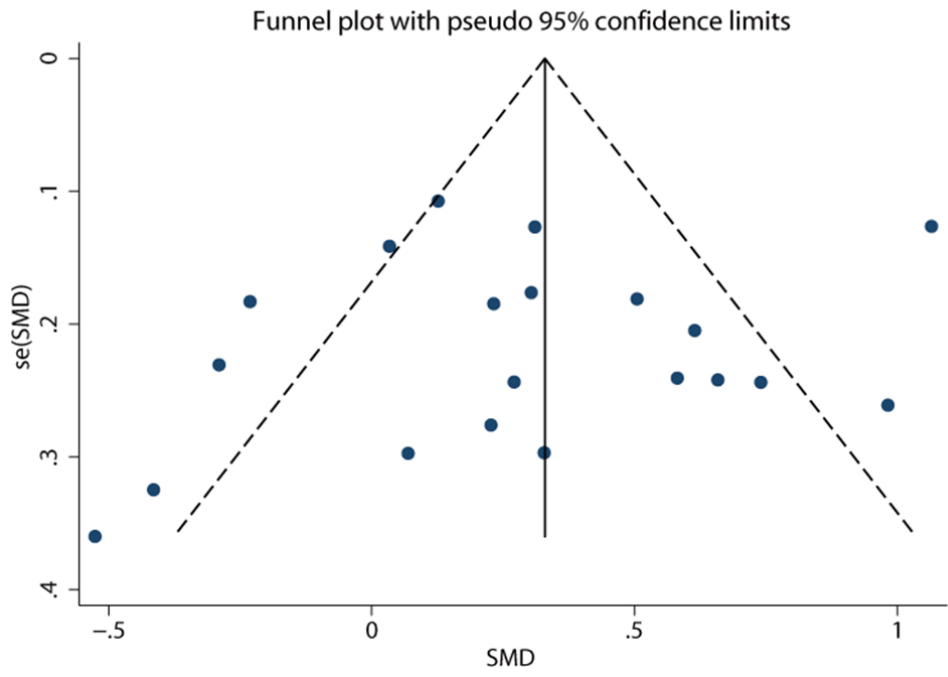

83x58mm (300 x 300 DPI)

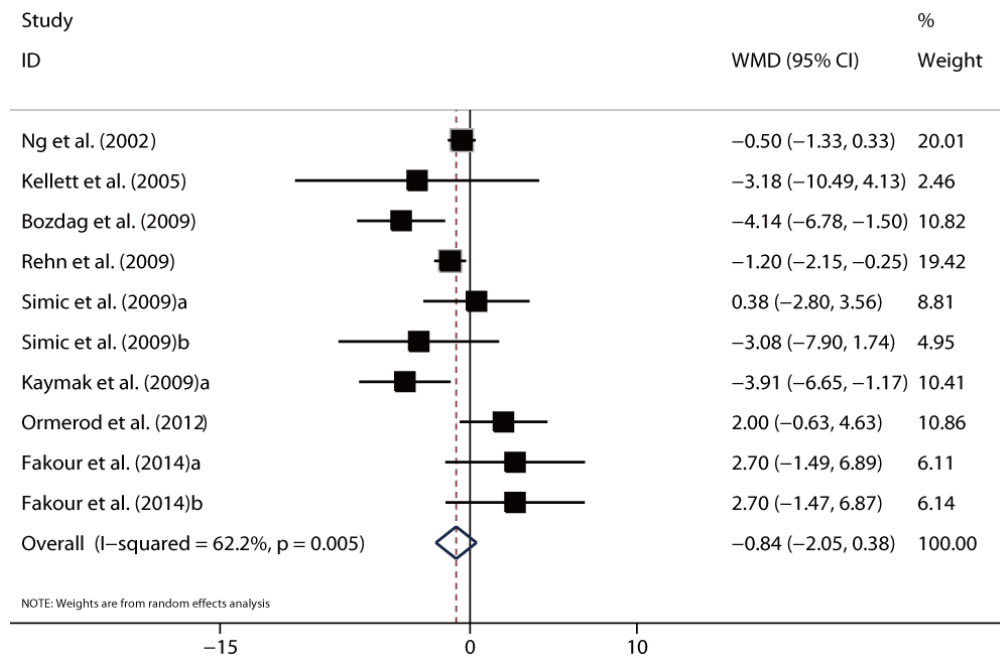

83x56mm (300 x 300 DPI)



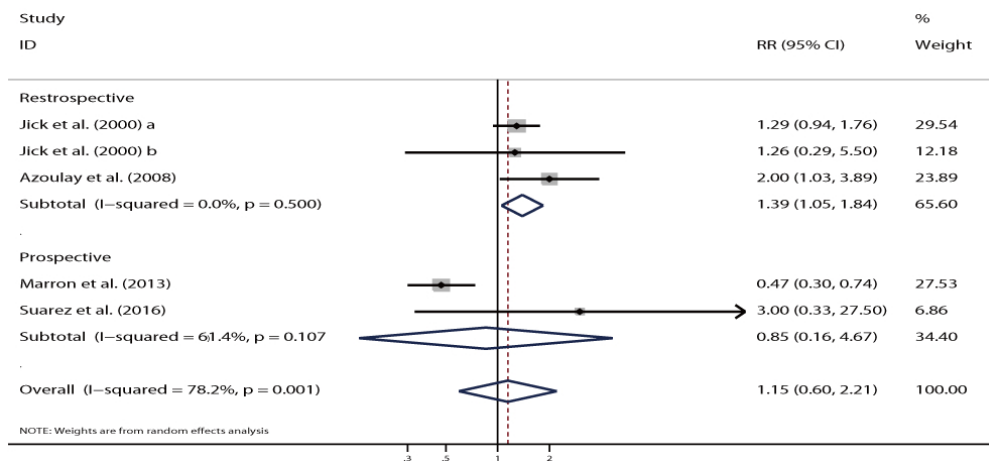

83x38mm (300 x 300 DPI)

1  
2  
3  
4  
5  
6  
7  
8  
9  
10  
11  
12  
13  
14  
15  
16  
17  
18  
19  
20  
21  
22  
23  
24  
25  
26  
27  
28  
29  
30  
31  
32  
33  
34  
35  
36  
37  
38  
39  
40  
41  
42  
43  
44  
45  
46  
47  
48  
49  
50  
51  
52  
53  
54  
55  
56  
57  
58  
59  
60

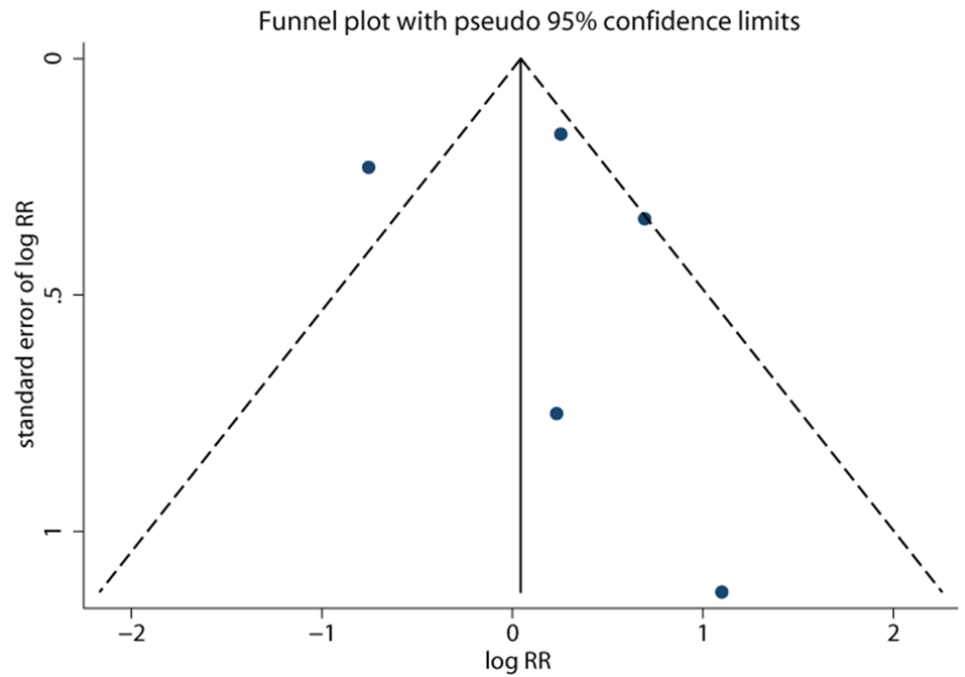

83x57mm (300 x 300 DPI)

**Searching strategy in PubMed:**

((("depression"[Mesh] OR "depression") OR "depressive"[Mesh] OR "depressive") AND  
("acne"[Mesh] OR "acne") AND ("isotretinoin"[Mesh] OR "isotretinoin"))

For peer review only

1  
2  
3  
4 **Use of isotretinoin and risk of depression in patients with acne: a systematic**  
5  
6 **review and meta-analysis**  
7

8  
9 Changqiang Li<sup>2</sup>, Jianmei Chen<sup>1</sup>, Wo Wang<sup>3</sup>, Ming Ai<sup>1</sup>, Qi Zhang<sup>1</sup>, Li Kuang<sup>1\*</sup>  
10

11  
12 <sup>1</sup>Department of Psychiatry, the First Affiliated Hospital of Chongqing Medical  
13  
14 University, Chongqing 400016, China  
15

16  
17 <sup>2</sup>Department of Dermatology, The Affiliated Hospital of Southwest Medical  
18  
19 University, Luzhou , 646000, China  
20

21  
22 <sup>3</sup>Mental Health Center, University-Town Hospital of Chongqing Medical University,  
23  
24 Chongqing 401331, China  
25

26  
27  
28  
29  
30 \*Corresponding author:

31  
32 Li Kuang  
33

34  
35 Department of Psychiatry, the First Affiliated Hospital of Chongqing Medical  
36  
37 University, Chongqing 400016, China  
38

39  
40 Tel: +86-13908379733  
41

42  
43 Fax: +86-21-64085875  
44

45  
46 Email: kuangli0308120@126.com  
47  
48  
49  
50  
51  
52  
53  
54  
55  
56  
57  
58  
59  
60

**Supplemental Table 1.** Newcastle–Ottawa scale for quality assessment of included studies

| <b>Study</b>           | <b>Selection</b> | <b>Comparability</b> | <b>Outcome</b> |
|------------------------|------------------|----------------------|----------------|
| Kellett et al. (1999)  | ****             | *                    | ***            |
| Jick et al. (2000) a   | ****             | **                   | **             |
| Jick et al. (2000) b   | ****             | **                   | **             |
| Ng et al. (2002)       | ****             | *                    | ***            |
| Ferahbas et al. (2004) | ****             | *                    | ***            |
| Kellett et al. (2005)  | ****             | *                    | ***            |
| Kaymak et al. (2006)   | ****             | *                    | ***            |
| Chia et al. (2005)     | ***              | *                    | ***            |
| Azoulay et al. (2008)  | ****             | **                   | **             |
| Kaymak et al. (2009)   | ****             | *                    | ***            |
| Bozdog et al. (2009)   | ****             | *                    | ***            |
| Rehn et al. (2009)     | ***              | *                    | ***            |
| Simic et al. (2009)    | ****             | *                    | ***            |
| McGrath et al. (2010)  | ****             | *                    | ***            |
| Ergun et al. (2012)    | ****             | *                    | ***            |
| Ormerod et al. (2012)  | ***              | *                    | ***            |
| Yesilova et al. (2012) | ****             | *                    | ***            |
| Marron et al. (2013)   | ****             | *                    | ***            |
| Fakour et al. (2014)   | ****             | *                    | ***            |
| Gnanaraj et al. (2015) | ****             | *                    | ***            |
| Suarez et al. (2016)   | ****             | *                    | ***            |

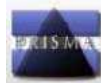

# PRISMA 2009 Checklist

| Section/topic                      | #  | Checklist item                                                                                                                                                                                                                                                                                              | Reported on page # |
|------------------------------------|----|-------------------------------------------------------------------------------------------------------------------------------------------------------------------------------------------------------------------------------------------------------------------------------------------------------------|--------------------|
| <b>TITLE</b>                       |    |                                                                                                                                                                                                                                                                                                             |                    |
| Title                              | 1  | Identify the report as a systematic review, meta-analysis, or both.                                                                                                                                                                                                                                         | 1                  |
| <b>ABSTRACT</b>                    |    |                                                                                                                                                                                                                                                                                                             |                    |
| Structured summary                 | 2  | Provide a structured summary including, as applicable: background; objectives; data sources; study eligibility criteria, participants, and interventions; study appraisal and synthesis methods; results; limitations; conclusions and implications of key findings; systematic review registration number. | 2                  |
| <b>INTRODUCTION</b>                |    |                                                                                                                                                                                                                                                                                                             |                    |
| Rationale                          | 3  | Describe the rationale for the review in the context of what is already known.                                                                                                                                                                                                                              | 3                  |
| Objectives                         | 4  | Provide an explicit statement of questions being addressed with reference to participants, interventions, comparisons, outcomes, and study design (PICOS).                                                                                                                                                  | 3                  |
| <b>METHODS</b>                     |    |                                                                                                                                                                                                                                                                                                             |                    |
| Protocol and registration          | 5  | Indicate whether a review protocol exists, if and where it can be accessed (e.g., Web address), and, if available, provide registration information including registration number.                                                                                                                          | 4                  |
| Eligibility criteria               | 6  | Specify study characteristics (e.g., PICOS and length of follow-up) and report characteristics (e.g., years considered, language, and publication status) used as criteria for eligibility, giving rationale.                                                                                               | 4                  |
| Information sources                | 7  | Describe all information sources (e.g., databases with dates of coverage and contact with study authors to identify additional studies) in the search and date last searched.                                                                                                                               | 4                  |
| Search                             | 8  | Present full electronic search strategy for at least one database, including any limits used, such that it could be repeated.                                                                                                                                                                               | 4                  |
| Study selection                    | 9  | State the process for selecting studies (i.e., screening, eligibility, included in systematic review, and, if applicable, included in the meta-analysis).                                                                                                                                                   | 4                  |
| Data collection process            | 10 | Describe method of data extraction from reports (e.g., piloted forms, independently, in duplicate) and any processes for obtaining and confirming data from investigators.                                                                                                                                  | 4                  |
| Data items                         | 11 | List and define all variables for which data were sought (e.g., PICOS and funding sources) and any assumptions and simplifications made.                                                                                                                                                                    | 4                  |
| Risk of bias in individual studies | 12 | Describe methods used for assessing the risk of bias of individual studies (including specification of whether this was done at the study or outcome level), and how this information is to be used in any data synthesis.                                                                                  | 4                  |
| Summary measures                   | 13 | State the principal summary measures (e.g., risk ratio and difference in means).                                                                                                                                                                                                                            | 4–5                |
| Synthesis of results               | 14 | Describe the methods of handling data and combining results of studies, if done, including measures of consistency (e.g., $I^2$ ) for each meta-analysis.                                                                                                                                                   | 4–5                |



# PRISMA 2009 Checklist

Page 1 of 2

| Section/topic                 | #  | Checklist item                                                                                                                                                                                               | Reported on page # |
|-------------------------------|----|--------------------------------------------------------------------------------------------------------------------------------------------------------------------------------------------------------------|--------------------|
| Risk of bias across studies   | 15 | Specify any assessment of risk of bias that may affect the cumulative evidence (e.g., publication bias and selective reporting within studies).                                                              | 4–5                |
| Additional analyses           | 16 | Describe methods of additional analyses (e.g., sensitivity or subgroup analyses and meta-regression), if done, indicating which were pre-specified.                                                          | 5                  |
| <b>RESULTS</b>                |    |                                                                                                                                                                                                              |                    |
| Study selection               | 17 | Give numbers of studies screened, assessed for eligibility, and included in the review, with reasons for exclusions at each stage, ideally with a flow diagram.                                              | 5                  |
| Study characteristics         | 18 | For each study, present characteristics for which data were extracted (e.g., study size, PICOS, and follow-up period) and provide the citations.                                                             | 6                  |
| Risk of bias within studies   | 19 | Present data on risk of bias of each study and, if available, any outcome-level assessment (see item 12).                                                                                                    | 6                  |
| Results of individual studies | 20 | For all outcomes considered (benefits or harms), present, for each study: (a) simple summary data for each intervention group and (b) effect estimates and confidence intervals, ideally with a forest plot. | 6–7                |
| Synthesis of results          | 21 | Present results of each meta-analysis done, including confidence intervals and measures of consistency.                                                                                                      | 6–7                |
| Risk of bias across studies   | 22 | Present results of any assessment of risk of bias across studies (see Item 15).                                                                                                                              | 6–7                |
| Additional analysis           | 23 | Give results of additional analyses, if done (e.g., sensitivity or subgroup analyses and meta-regression [see Item 16]).                                                                                     | 6–7                |
| <b>DISCUSSION</b>             |    |                                                                                                                                                                                                              |                    |
| Summary of evidence           | 24 | Summarize the main findings including the strength of evidence for each main outcome; consider their relevance to key groups (e.g., health care providers, users, and policy makers).                        | 7–9                |
| Limitations                   | 25 | Discuss limitations at study and outcome levels (e.g., risk of bias), and at review level (e.g., incomplete retrieval of identified research and reporting bias).                                            | 9                  |
| Conclusions                   | 26 | Provide a general interpretation of the results in the context of other evidence, and implications for future research.                                                                                      | 9                  |
| <b>FUNDING</b>                |    |                                                                                                                                                                                                              |                    |
| Funding                       | 27 | Describe sources of funding for the systematic review and other support (e.g., supply of data); role of funders for the systematic review.                                                                   | N/A                |

From: Moher D, Liberati A, Tetzlaff J, Altman DG, The PRISMA Group (2009). Preferred Reporting Items for Systematic Reviews and Meta-Analyses: The PRISMA Statement. PLoS Med 6(6): e1000097. doi:10.1371/journal.pmed1000097

For more information, visit: [www.prisma-statement.org](http://www.prisma-statement.org).

Page 2 of 2

For peer review only - <http://bmjopen.bmj.com/site/about/guidelines.xhtml>

# BMJ Open

## Use of isotretinoin and risk of depression in patients with acne: a systematic review and meta-analysis

|                                 |                                                                                                                                                                                                                                                                                                                                                                                                                                                                                                                                       |
|---------------------------------|---------------------------------------------------------------------------------------------------------------------------------------------------------------------------------------------------------------------------------------------------------------------------------------------------------------------------------------------------------------------------------------------------------------------------------------------------------------------------------------------------------------------------------------|
| Journal:                        | <i>BMJ Open</i>                                                                                                                                                                                                                                                                                                                                                                                                                                                                                                                       |
| Manuscript ID                   | bmjopen-2018-021549.R2                                                                                                                                                                                                                                                                                                                                                                                                                                                                                                                |
| Article Type:                   | Research                                                                                                                                                                                                                                                                                                                                                                                                                                                                                                                              |
| Date Submitted by the Author:   | 22-Nov-2018                                                                                                                                                                                                                                                                                                                                                                                                                                                                                                                           |
| Complete List of Authors:       | Li, Changqiang ; the Affiliated Hospital of Southwest Medical University, Department of Dermatology<br>Chen, Jianmei ; the First Affiliated Hospital of Chongqing Medical University, Department of Psychiatry<br>Wang, Wo ; University-Town Hospital of Chongqing Medical University, Mental Health Center<br>Ai, Ming ; the First Affiliated Hospital of Chongqing Medical University, Department of Psychiatry<br>Zhang, Qi ; the First Affiliated Hospital of Chongqing Medical University, Department of Psychiatry<br>Kuang, Li |
| <b>Primary Subject Heading</b>: | Dermatology                                                                                                                                                                                                                                                                                                                                                                                                                                                                                                                           |
| Secondary Subject Heading:      | Dermatology                                                                                                                                                                                                                                                                                                                                                                                                                                                                                                                           |
| Keywords:                       | Acne < DERMATOLOGY, Depression & mood disorders < PSYCHIATRY, ORAL MEDICINE                                                                                                                                                                                                                                                                                                                                                                                                                                                           |
|                                 |                                                                                                                                                                                                                                                                                                                                                                                                                                                                                                                                       |

SCHOLARONE™  
Manuscripts



1  
2  
3  
4 **Use of isotretinoin and risk of depression in patients with acne: a systematic review and**  
5  
6 **meta-analysis**  
7

8  
9 Changqiang Li<sup>2</sup>, Jianmei Chen<sup>1</sup>, Wo Wang<sup>3</sup>, Ming Ai<sup>1</sup>, Qi Zhang<sup>1</sup>, Li Kuang<sup>1\*</sup>  
10

11  
12 <sup>1</sup>Department of Psychiatry, the First Affiliated Hospital of Chongqing Medical University,  
13  
14 Chongqing 400016, China  
15

16  
17 <sup>2</sup>Department of Dermatology, the Affiliated Hospital of Southwest Medical University,  
18  
19 Luzhou646000, China  
20

21  
22 <sup>3</sup>Mental Health Center, University-Town Hospital of Chongqing Medical University,  
23  
24 Chongqing 401331, China  
25

26  
27  
28  
29  
30 **\*Corresponding author:**  
31

32  
33 Li Kuang  
34

35  
36 Department of Psychiatry, the First Affiliated Hospital of Chongqing Medical University,  
37  
38 Chongqing 400016, China  
39

40  
41 Tel: +86-13908379733  
42

43  
44 Fax: +86-21-64085875  
45

46  
47 Email: kuangli0308@163.com  
48  
49

50  
51 **Running title:** Isotretinoin and risk of depression in patients with acne  
52  
53  
54  
55  
56  
57  
58  
59  
60

## ABSTRACT

**Objective:** This study aimed to investigate the association between the use of isotretinoin and the risk of depression in patients with acne.

**Design:** This was a meta-analysis in which the standardized mean difference (SMD) and the relative risk (RR) were used for data synthesis employed the random-effects model.

**Setting:** Studies were identified via electronic searches of PubMed, Embase, and the Cochrane Library from inception up to December 28, 2017.

**Participants:** Patients with acne.

**Interventions:** Studies comparing isotretinoin with other interventions in patients with acne were included.

**Results:** Twenty studies were selected. The analysis of 17 studies showed a significant association of the use of isotretinoin with improved symptoms compared with the baseline before treatment [SMD = -0.33, 95% confidence interval (CI) -0.51 to -0.15,  $P < 0.05$ ;  $I^2 = 76.6\%$ ,  $P < 0.05$ ]. Four studies were related to the analysis of the risk of depression. The pooled data indicated no association of the use of isotretinoin with the risk of depressive disorders (RR = 1.15, 95% CI 0.60–2.21,  $P = 0.14$ ). The association of the use of isotretinoin with the risk of depressive disorders was statistically significant on pooling retrospective studies (RR = 1.39, 95% CI 1.05–1.84,  $P = 0.02$ ), but this association was not evident on pooling prospective studies (RR = 0.85, 95% CI 0.60–2.21,  $P = 0.86$ ).

1  
2  
3  
4 **Conclusions:** This study suggested an association of the use of isotretinoin in patients with  
5  
6 acne with significantly improved depression symptoms. Future randomized controlled trials  
7  
8 are needed to verify the present findings.  
9  
10

#### 11 12 13 14 15 **Strengths and limitations of this study**

- 16  
17  
18 1. Most included studies were prospectively designed, and the quality of included studies was  
19  
20 largely moderate to high.  
21  
22  
23 2. The heterogeneity was explored by sensitivity, subgroup, and meta-regression analyses.  
24  
25  
26 3. The small sample sizes of some included studies might have limited the statistical power and  
27  
28 increased the chance of missing small effects.  
29  
30  
31 4. No randomized controlled trial was available so far, which was a major drawback for studies  
32  
33 on this topic.  
34  
35  
36 5. The treatment duration, drug dose, and depression scale varied between different studies.  
37  
38  
39  
40  
41

42 **Key words:** acne; depression; isotretinoin; meta-analysis  
43  
44  
45  
46  
47  
48  
49  
50  
51  
52  
53  
54  
55  
56  
57  
58  
59  
60

## INTRODUCTION

Acne vulgaris is a chronic inflammatory disease of the pilosebaceous unit of the face, neck, chest, and back <sup>1</sup>. As a pleomorphic skin disease, it may present as noninflammatory lesions (open and closed comedones) or inflammatory lesions (papules, pustules, or nodules) <sup>2</sup>. It is the most common skin disease around the world, with an estimated prevalence of 70%–87% <sup>3</sup>.

The economic burden of acne is substantial. The cost is estimated to exceed \$1 billion per year in the United States for direct acne therapy, with \$100 million spent on various acne products <sup>4</sup>. Acne vulgaris may cause cosmetic defects and significantly impact the quality of life <sup>5</sup>. It may provoke a wide range of mental problems, including depression, anxiety, poor self-esteem, social phobia, and even suicidal attempts <sup>6</sup>.

The optimal treatment approach depends on the morphology and severity of acne. Mild cases are suggested to be treated with topical retinoids. For moderate cases, systemic drugs are always needed, including oral antibiotics, hormonal therapy, and oral retinoids. However, for severe or resistant moderate acne, isotretinoin is the treatment of choice <sup>1,2,4,7</sup>. Isotretinoin is a vitamin A-derivative 13-*cis*-retinoic acid, which is the most effective therapy for acne to date. It targets all four processes during acne development, including normalization of follicular desquamation, reduction of sebaceous gland activity, inhibition of the proliferation of *Propionibacterium acnes*, and anti-inflammatory effects <sup>2,7,8</sup>. The meta-analysis suggested that isotretinoin cured around 85% of patients after an average treatment course of 4 months <sup>9</sup>.

Depressive disorders are highly prevalent in the Western world. The lifetime prevalence of major depressive disorders in the United States and Western Europe is around 13%–16% <sup>10</sup>.

1  
2  
3  
4 The frequency of depressive disorders during the use of isotretinoin varies from 1% to 11% <sup>11</sup>.  
5  
6  
7 Theoretically, effective treatment may lead to an improvement in depressive symptoms of  
8  
9 patients with acne. However, the use of systemic isotretinoin itself may potentially increase the  
10  
11 risk of depression <sup>12</sup>. Experimental studies showed that isotretinoin could affect the central  
12  
13 nervous system and was involved in the pathogenesis of depression <sup>13</sup>. However, some  
14  
15 researchers disputed that the risk was extremely small and might be influenced by the  
16  
17 background risk or nondrug confounding factors <sup>12</sup>. The evidence for this controversy remained  
18  
19 incomplete and unclear. Therefore, this systematic review and meta-analysis was performed to  
20  
21 explore the association between the use of isotretinoin and the risk of depression among  
22  
23 patients with acne. Further, whether this relationship differed in patients with specific  
24  
25 characteristics was also explored.  
26  
27  
28  
29  
30  
31  
32  
33  
34  
35  
36

## 37 **METHODS**

### 38 **Literature search**

39  
40  
41  
42 The Preferred Reporting Items for Systematic Reviews and Meta-Analyses guideline was  
43  
44 followed to conduct this meta-analysis <sup>14</sup>. A literature search for articles published between  
45  
46 May 1984 and December 28, 2017, was performed using PubMed, Embase, and the Cochrane  
47  
48 Library. The following groups of keywords were used in the search: (“depression” OR  
49  
50 “depressive”) AND “acne” AND “isotretinoin.” The details of searching strategy in PubMed  
51  
52 are presented in Supplemental 1. Also, a manual search of references listed in included studies  
53  
54  
55  
56  
57  
58  
59  
60

1  
2  
3  
4 and published reviews were also performed to search for potentially eligible studies. The  
5  
6 language was restricted to English.  
7

### 8 9 **Selection criteria**

10  
11 Studies were included if they fulfilled the following criteria: (1) being randomized controlled  
12  
13 trial (RCT), prospective or retrospective study, nested case–control study, or population-based  
14  
15 case–control study; (2) comparing the outcomes before and after the use of isotretinoin in  
16  
17 patients with acne; or comparing isotretinoin with other treatment regimens in patients with  
18  
19 acne; (3) presenting the change in depressive symptoms measured using a continuous  
20  
21 depression scale <sup>15</sup>; or reporting the number of depressive patients before and after the use of  
22  
23 isotretinoin; or directly presenting the relative risk (RR), odds ratio (OR), or hazard ratio (HR)  
24  
25 between the use of isotretinoin and the risk of depression.  
26  
27  
28  
29  
30  
31  
32

### 33 **Data extraction and quality assessment**

34  
35 Two authors independently assessed the titles and abstracts for eligibility and extracted data in  
36  
37 standardized electronic tables. The following data were extracted from included studies:  
38  
39 publication year, author, study design, sample size, participant sex and age, severity of acne,  
40  
41 compared groups, dose and duration of isotretinoin, and depression assessment tool. The  
42  
43 quality of included studies was assessed using the 9-star Newcastle–Ottawa Scale. This scale  
44  
45 evaluated the study quality based on three parameters: selection, comparability, and exposure  
46  
47 (case–control study) or outcome (cohort study). A maximum of 4 points was assigned for the  
48  
49 item of selection, 2 points for comparability, and 3 points for exposure/outcome <sup>16</sup>. Studies  
50  
51  
52  
53  
54  
55  
56  
57  
58  
59  
60

1  
2  
3  
4 were deemed as high quality for a score of 8–9, moderate quality for a score of 6–7, and low  
5  
6 quality for a score  $\leq 5$ .  
7  
8

### 9 **Statistical analysis**

10  
11  
12 The continuous outcome of interest was the alteration in depressive symptoms assessed using  
13  
14 a continuous depression scale after the use of isotretinoin. For the continuous parameter of  
15  
16 depression score, the means and standard differences (SD) of the scores were extracted. The  
17  
18 standard mean difference (SMD) was used as the outcome measure. The SMD was a unitless  
19  
20 effect size estimate, which was the mean difference in the depression score between the  
21  
22 compared groups divided by the pooled SD of the distribution of the score used in the study.  
23  
24  
25 The conversion of median (range/interquartile range) to mean  $\pm$  SD was done by a previously  
26  
27 proposed method <sup>17</sup>. The binary outcome of interest was the number of participants whose  
28  
29 conditions were regarded as depression. RR and its corresponding 95% confidence interval  
30  
31 (CI) were used as the outcome measure. HR was regarded as equivalent to RR in cohort studies.  
32  
33  
34 Given the overall low incidence of depression among the general population, OR was assumed  
35  
36 to be an accurate estimate of RR. It was preferred to use the effect measures that reflected the  
37  
38 greatest degree control for confounding factors. Both adjusted and crude data were analyzed.  
39  
40  
41 When data on different subgroups were reported by the same cohort, they were first pooled  
42  
43 using the fixed-effects model. As the random-effects model was more robust than the fixed-  
44  
45 effects model, the DerSimonian–Laird random-effects model was used to calculate the overall  
46  
47 effect estimates for the association between the use of isotretinoin and the risk of depression  
48  
49  
50  
51  
52  
53  
54  
55  
56  
57  
58  
59  
60  
18. The heterogeneity was evaluated using the Cochrane Q test and the  $I^2$  statistic. Heterogeneity

1  
2  
3  
4 was considered low, moderate, or high for  $I^2 < 25\%$ ,  $25\%–50\%$ , and  $>50\%$ , respectively <sup>19, 20</sup>.

5  
6 Subgroup analyses were conducted based on the following confounders: region, study design,  
7  
8 sample size, female percentage, and depression scale. Furthermore, meta-regression analyses  
9  
10 were performed for the continuous confounders of sample size and female percentage. A  
11  
12 sensitivity analysis was conducted by excluding a single study at a time. Also, a sensitivity  
13  
14 analysis was conducted using the weighted mean difference (WMD) as the effect estimate for  
15  
16 studies employing the same depression symptom scale. The publication bias was visually  
17  
18 assessed by constructing a funnel plot and statistically assessed using the Begg's and Egger's  
19  
20 regression asymmetry tests <sup>21, 22</sup>. All statistical analyses were conducted using the software  
21  
22 Stata 12.0 (StataCorp, TX, USA). A *P* value less than 0.05 was considered statistically  
23  
24 significant.  
25  
26  
27  
28  
29  
30  
31  
32

### 33 **Patient and public involvement statement**

34  
35 Patients and the public were not involved  
36  
37  
38  
39  
40  
41  
42

## 43 **RESULTS**

### 44 **Study selection**

45  
46 A total of 632 records were retrieved from the electronic search, including 145 studies from  
47  
48 PubMed, 469 records from Embase, and 18 records from the Cochrane Library. After screening  
49  
50 by titles and abstracts, 571 studies were excluded for the following reasons: reviews, editorials,  
51  
52 case reports, or irrelevant studies, leaving 61 studies for full-text review. Nine cross-sectional  
53  
54 studies, 19 studies without sufficient data, and 13 review, editorial, or comments were excluded.  
55  
56  
57  
58  
59  
60



1  
2  
3  
4 Finally, 20 studies were pooled into the meta-analysis <sup>23-43</sup>. A flow diagram of the study  
5  
6 selection process is depicted in Figure 1.  
7  
8

### 9 10 **Study characteristics**

11  
12 The characteristics of the included 20 studies are shown in Table 1. Jick et al. reported two  
13  
14 independent cohorts <sup>24</sup>, which were analyzed separately. Except for two retrospective studies  
15  
16 identifying depressive patients using the International Classification of Diseases code <sup>24, 31</sup>,  
17  
18 other studies were prospectively designed, and depression was assessed using depression  
19  
20 symptom scales. The number of participants using isotretinoin ranged from 16 to 7195. The  
21  
22 enrolled patients with acne were distributed around the world, including 14 cohorts from  
23  
24 Europe, 3 from North America, 3 from Asia, and 1 from Africa. The percentage of female  
25  
26 patients ranged from 0% to 73%. Most studies compared data before and after the use of  
27  
28 isotretinoin, except for two studies. Simic et al. compared isotretinoin with vitamin C <sup>35</sup>.  
29  
30 Azoulay et al. compared isotretinoin users with nonusers <sup>31</sup>. Most studies prescribed  
31  
32 isotretinoin for moderate-to-severe acne. The dose of isotretinoin ranged largely from 0.5 to  
33  
34 1.0 mg/(kg · d). The duration of the use of isotretinoin ranged from around 1 month to about  
35  
36 half a year. The quality of included studies is shown in Supplemental 2. Most studies had  
37  
38 satisfactorily high quality. The least satisfactory item was the adjustment of the confounding  
39  
40 factors.  
41  
42  
43  
44  
45  
46  
47  
48  
49  
50  
51

### 52 53 **Change in depression symptom scores after treatment**

54  
55 Seventeen studies reported the depression symptom scores before and after the use of  
56  
57 isotretinoin. All studies were prospectively designed. Simic et al. (2009) presented data for  
58  
59  
60

1  
2  
3  
4 moderate and severe acne<sup>35</sup>. Fakour et al. showed data for males and females separately<sup>37</sup>.  
5  
6  
7 Kaymak et al. reported depression scores measured using Beck Depression Inventory (BDI)  
8  
9 and hospital anxiety and depression scale-depression (HADS-D) scales<sup>33</sup>. These subgroup data  
10  
11 were all pooled into the overall analysis. Compared with the baseline condition before therapy,  
12  
13 the use of isotretinoin was associated with a significant improvement in depressive symptoms  
14  
15 (SMD = -0.33, 95% CI -0.51 to -0.15,  $P < 0.05$ ) (Fig. 2). Highly significant heterogeneity  
16  
17 was revealed ( $I^2 = 76.6%$ ,  $P < 0.05$ ).  
18  
19  
20  
21  
22

23 In the sensitivity analysis, the overall effect was not substantially altered when excluding any  
24  
25 single study. In the meta-regression analysis, the number of included participants ( $P = 0.995$ )  
26  
27 and the female proportion ( $P = 0.56$ ) did not account for the source of heterogeneity. Data on  
28  
29 subgroup analyses are shown in Table 2. The pooled effect estimate remained significant for  
30  
31 14 European studies (SMD = -0.35, 95% CI -0.51 to -0.19,  $P < 0.05$ ), with moderate  
32  
33 heterogeneity ( $I^2 = 46.3%$ ). However, the analysis of three Asian studies did not show  
34  
35 significant results (SMD = -0.18, 95% CI -0.81 to 0.45,  $P = 0.57$ ;  $I^2 = 94.4%$ ). The use of  
36  
37 isotretinoin had no significant effect on depressive symptoms in North America (SMD = -0.23,  
38  
39 95% CI -0.59 to 0.13;  $P = 0.21$ ), while it was associated with improved depressive symptoms  
40  
41 in Africa (SMD = -0.74, 95% CI -1.22 to -0.26,  $P < 0.05$ ). The pooled results remained  
42  
43 significant for studies using HADS-D (SMD = -0.57, 95% CI -0.83 to -0.31,  $P < 0.25$ ;  $I^2 =$   
44  
45 27.2%), and those using the Center for Epidemiological Studies Depression scale (CES-D)  
46  
47 (SMD = -0.27, 95% CI -0.52 to -0.02,  $P < 0.05$ ;  $I^2 = 0%$ ). However, the pooled effect turned  
48  
49 to be nonsignificant for studies using the BDI scale (SMD = -0.15, 95% CI -0.36 to 0.06,  $P =$   
50  
51  
52  
53  
54  
55  
56  
57  
58  
59  
60

1  
2  
3  
4 0.17;  $I^2 = 62.4\%$ ) and those using the Hamilton Rating Scale (HRS) (SMD =  $-0.55$ , 95% CI  
5  
6  $-1.56$  to  $0.46$ ,  $P = 0.29$ ;  $I^2 = 96.6\%$ ). The pooled effects were significant for both studies with  
7  
8 a smaller sample size (SMD =  $-0.38$ , 95% CI  $-0.65$  to  $-0.12$ ,  $P < 0.05$ ) and those with a larger  
9  
10 sample size (SMD =  $-0.29$ , 95% CI  $-0.54$  to  $-0.04$ ,  $P < 0.05$ ). The results for different  
11  
12 proportions of females did not show a significant difference. The funnel plot appeared to be  
13  
14 symmetrical (Fig. 3). No publication bias was revealed using the Egger's test ( $P = 0.76$ ) or the  
15  
16 Begg's test ( $P = 0.87$ ).

17  
18 Also, the sensitivity analysis was performed by pooling the WMD for studies using the same  
19  
20 scale. The pooled results were nonsignificant for studies using the BDI scale (WMD =  $-0.84$ ,  
21  
22 95% CI  $-2.05$  to  $0.38$ ,  $P = 0.18$ ;  $I^2 = 62.2\%$ ,  $P < 0.05$ ) (Fig. 4) and those using HRS (WMD =  
23  
24  $-1.91$ , 95% CI  $-5.44$  to  $1.63$ ,  $P = 0.29$ ;  $I^2 = 97.3\%$ ,  $P < 0.05$ ). In contrast, the pooled WMDs  
25  
26 were significant for studies using HADS-D (WMD =  $-2.06$ , 95% CI  $-3.42$  to  $-0.70$ ,  $P < 0.05$ ;  
27  
28  $I^2 = 66.0\%$ ,  $P < 0.05$ ) and those using CES-D (WMD =  $-1.88$ , 95% CI  $-3.64$  to  $-0.11$ ,  $P <$   
29  
30  $0.05$ ;  $I^2 = 0\%$ ,  $P = 0.63$ ).

### 41 42 **Use of isotretinoin and risk of depression**

43  
44 Two retrospective studies showed the adjusted RR for the association between the use of  
45  
46 isotretinoin and the risk of depression<sup>24, 31</sup>. Jick et al. presented data for two independent  
47  
48 cohorts. The overall result of three cohorts showed that the use of isotretinoin was associated  
49  
50 with an increased risk of depression (RR =  $1.39$ , 95% CI  $1.05$ – $1.84$ ,  $P = 0.02$ ; Fig. 5), and no  
51  
52 significant heterogeneity was shown ( $I^2 = 0.0\%$ ,  $P = 0.50$ ). However, no significant difference  
53  
54 was noted in the relationship between isotretinoin use and the risk of depression on pooling  
55  
56  
57  
58  
59  
60

1  
2  
3  
4 two prospective studies (RR = 0.85, 95% CI 0.60–2.21,  $P = 0.86$ ; Fig. 5), and a substantial  
5  
6 heterogeneity was observed ( $I^2 = 61.4\%$ ,  $P = 0.11$ ). The funnel plot appeared to be symmetrical  
7  
8 (Fig. 6), and the Egger's test ( $P = 0.76$ ) or the Begg's test ( $P = 1.00$ ) suggested no evidence of  
9  
10 potential publication bias.  
11  
12  
13  
14  
15  
16

## 17 **DISCUSSION**

18  
19  
20 The risk of depression associated with the use of isotretinoin in patients with acne has been a  
21  
22 major concern for a long time. Previous data showed conflicting and inconsistent results. This  
23  
24 meta-analysis assessed the association between the use of isotretinoin and the risk of depression.  
25  
26 It had several strengths as follows. A comprehensive database search of worldwide cohorts was  
27  
28 conducted, enrolling a large number of participants. The quality of included studies was largely  
29  
30 moderate to high. Most included studies were prospectively designed. The association was  
31  
32 investigated from several aspects. The heterogeneity was explored by sensitivity, subgroup,  
33  
34 and meta-regression analyses. The present findings showed that isotretinoin improved in  
35  
36 depressive symptoms in patients with acne. The benefit remained marked for studies using  
37  
38 HADS-D and CES-D. In risk assessment, the summary RR showed that the use of isotretinoin  
39  
40 was associated with an increased risk of depression in patients with acne on pooling  
41  
42 retrospective studies, while this significant difference was not observed on pooling prospective  
43  
44 studies.  
45  
46  
47  
48  
49  
50  
51  
52  
53

54  
55 Two previous systematic reviews on this topic were identified<sup>13, 44</sup>. They showed conflicting  
56  
57 results, and hence the association between isotretinoin use and depression remained  
58  
59  
60

1  
2  
3  
4 controversial. Further, although comprehensive scenarios were presented, data synthesis to  
5  
6 obtain pooled results could not be conducted. Vallerand conducted a systematic review based  
7  
8 on 11 trials to evaluate the efficacy and safety of oral isotretinoin for acne. Oral isotretinoin  
9  
10 significantly reduced the counts of acne lesions but increased the frequency of psychiatric  
11  
12 adverse events (depressed mood, fatigue, hallucination, insomnia, and lethargy; 32 vs 19).  
13  
14 However, this study did not provide the result by data synthesis <sup>45</sup>. Further, Huang et al  
15  
16 conducted a meta-analysis based on 31 studies and suggested that the use of isotretinoin did  
17  
18 not affect the incidence of depression. Further, they showed that the treatment of acne could  
19  
20 ameliorate depressive symptoms. However, the study summarized the investigated outcomes  
21  
22 using the depression assessment tool. Whether these relationships differed according to the  
23  
24 region, study design, sample size, and the female percentage was not illustrated <sup>46</sup>. Therefore,  
25  
26 the present study was conducted to evaluate any potential impact of the use of isotretinoin on  
27  
28 depression incidence and change in the depression score.  
29  
30  
31  
32  
33  
34  
35  
36  
37  
38

39 The concern for negative mood arose from a series of experimental studies. Oral isotretinoin  
40  
41 significantly suppressed cell division in the hippocampus and severely disrupted the learning  
42  
43 capacity of mice <sup>47</sup>. Bremner et al. found that the use of isotretinoin, but not antibiotics, was  
44  
45 associated with decreased brain metabolism in the orbitofrontal cortex, which was known to  
46  
47 mediate depression symptoms <sup>48</sup>. O'Reilly et al. proved that isotretinoin altered intracellular  
48  
49 serotonin level and increased 5-HT1A receptor and serotonin reuptake transporter levels *in*  
50  
51 *vitro* <sup>49</sup>. Thus, theoretically, isotretinoin itself might cause depressive disorders. However, the  
52  
53 potentially increased risk of depression could be compensated by the beneficial effects of  
54  
55  
56  
57  
58  
59  
60

1  
2  
3  
4 isotretinoin on patients with acne. Most patients with acne were worried about their  
5  
6  
7 appearances, which might lead to a series of psychological disorders. It was inferred that the  
8  
9  
10 improvement in depression symptoms after the use of isotretinoin might be attributed to the  
11  
12 treatment success. Also, isotretinoin had a gradual effect on mood over time, which was not an  
13  
14 acute event <sup>50</sup>.

15  
16  
17 Of note, the controversy over this topic was complicated by various confounding psychosocial  
18  
19 and clinical factors. Aktan et al. suggested that adolescent girls were more vulnerable to the  
20  
21 negative psychological effects of acne compared with boys <sup>51</sup>. Women with acne were  
22  
23 significantly more embarrassed about their skin disease compared with males. A large database  
24  
25 study showed that female gender and acne could jointly increase the risk of depression <sup>52</sup>.  
26  
27 However, the role of gender was not revealed in meta-regression and subgroup analyses. Acne  
28  
29 itself can exert different impacts on individual patients. The lack of knowledge, especially  
30  
31 about prognosis, may be a source of depression <sup>24, 53</sup>. Approximately one fifth of patients with  
32  
33 acne suffered from psychiatric disorders <sup>33</sup>. Better health education and care are important  
34  
35 components for treating patients with acne. They help eliminate the patients' misconceptions  
36  
37 about the disease and unrealistic treatment expectations <sup>54</sup>. The psychological interventions  
38  
39 may vary between different clinical settings and lead to a bias in the effect of isotretinoin.  
40  
41 Besides, data on the efficacy or side effect of the use of isotretinoin were insufficient in most  
42  
43 included studies. Isotretinoin may cause teratogenic toxicity. Contraceptives are recommended  
44  
45 for female users of fertile age to prevent pregnancy until the completion of the treatment <sup>41</sup>.  
46  
47  
48  
49  
50  
51  
52  
53  
54  
55  
56  
57  
58  
59  
60

1  
2  
3  
4 The levels of blood cholesterol and liver enzymes may be abnormal and should be monitored  
5  
6 during the treatment phase <sup>55</sup>.  
7  
8

9 This meta-analysis had several shortcomings. The sample sizes of some included studies were  
10  
11 still small, which might have limited the statistical power and increased the chance of missing  
12  
13 small effects. The current pooled analysis based on observational studies and no RCT was  
14  
15 available, which may overestimate the association between isotretinoin use and depression risk.  
16  
17 Moreover, included study designed as observational design might have a bias caused by  
18  
19 participant selection and confounding factors. Ideally, RCTs comparing isotretinoin with  
20  
21 placebo or other agents may provide more robust findings, whereas most included studies  
22  
23 compared the before- and after-treatment data. However, leaving patients with moderate-to-  
24  
25 severe acne without the use of isotretinoin may be unfair and even not ethical. Additionally,  
26  
27 the treatment duration, drug dose, and depression scale varied between different studies. The  
28  
29 acne severity or the dose of isotretinoin varied and was not reported by several studies. Patients  
30  
31 with severe acne or scars or those unresponsive to therapy might have a worse depressive mood.  
32  
33 However, the analyses for these confounding factors were insufficient in most studies.  
34  
35 Approximately one fifth of patients with acne suffered from psychiatric disorders <sup>33</sup>. Also,  
36  
37 some studies were sponsored by corporations <sup>24</sup>, which might have underestimated the  
38  
39 incidence of depressive disorders. Finally, although a greater risk of depression was associated  
40  
41 with the use of isotretinoin on pooling retrospective studies, selection and recall biases might  
42  
43 have affected the incidence of depression. Further, these conclusions might be unreliable  
44  
45 because smaller cohorts were included in such subsets.  
46  
47  
48  
49  
50  
51  
52  
53  
54  
55  
56  
57  
58  
59  
60

1  
2  
3  
4 This meta-analysis showed that patients might have improved depressive symptoms after the  
5  
6 use of isotretinoin. Further, the use of isotretinoin in patients with acne did not contribute to  
7  
8 the development of depression. However, the summary results of retrospective studies  
9  
10 suggested that the use of isotretinoin in patients with acne might increase the risk of depression.  
11  
12  
13  
14  
15 Future prospective controlled trials are warranted to verify the present findings.  
16  
17

### 20 **Funding**

21  
22 Not applicable.  
23  
24  
25  
26  
27

### 28 **Conflicts of interest statement**

29  
30 Not declared.  
31  
32  
33  
34  
35

### 36 **Author contributions**

37  
38  
39 CQL and LK contributed to conception and design. CQL, JMC, WW, MA, QZ, and LK  
40  
41 contributed to data acquisition or analysis and interpretation of data. CQL, JMC, WW, MA,  
42  
43 QZ, and LK were involved in drafting the manuscript or revising it critically for important  
44  
45 intellectual content. All authors have given final approval of the version to be published.  
46  
47  
48  
49  
50  
51

### 52 **Data sharing statement**

53  
54  
55 Extra data can be accessed via the Dryad data repository at <http://datadryad.org/> with the doi:  
56  
57  
58 10.5061/dryad.ft545hs  
59  
60



**REFERENCES**

- 1 Williams HC, Dellavalle RP, Garner S. Acne vulgaris. *Lancet* 2012;**379**:361-72.
- 2 Katsambas AD, Stefanaki C, Cunliffe WJ. Guidelines for treating acne. *Clin Dermatol* 2004;**22**:439-44.
- 3 Dreno B, Poli F. Epidemiology of acne. *Dermatology* 2003;**206**:7-10.
- 4 James WD. Clinical practice. Acne. *N Engl J Med* 2005;**352**:1463-72.
- 5 Thomas DR. Psychosocial effects of acne. *J Cutan Med Surg* 2004;**8 Suppl 4**:3-5.
- 6 Saitta P, Keehan P, Yousif J, et al. An update on the presence of psychiatric comorbidities in acne patients, Part 2: Depression, anxiety, and suicide. *Cutis* 2011;**88**:92-7.
- 7 Dawson AL, Dellavalle RP. Acne vulgaris. *BMJ* 2013;**346**:f2634.
- 8 Chivot M. Retinoid therapy for acne. A comparative review. *Am J Clin Dermatol* 2005;**6**:13-9.
- 9 Wessels F, Anderson AN, Kropman K. The cost-effectiveness of isotretinoin in the treatment of acne. Part 1. A meta-analysis of effectiveness literature. *S Afr Med J* 1999;**89**:780-4.
- 10 Kurek A, Johanne Peters EM, Sabat R, et al. Depression is a frequent co-morbidity in patients with acne inversa. *J Dtsch Dermatol Ges* 2013;**11**:743-9, 43-50.
- 11 Borovaya A, Olisova O, Ruzicka T, et al. Does isotretinoin therapy of acne cure or cause depression? *Int J Dermatol* 2013;**52**:1040-52.
- 12 Wolverton SE, Harper JC. Important controversies associated with isotretinoin therapy for acne. *Am J Clin Dermatol* 2013;**14**:71-6.
- 13 Kontaxakis VP, Skourides D, Ferentinos P, et al. Isotretinoin and psychopathology: a review. *Ann Gen Psychiatry* 2009;**8**:2.

- 1  
2  
3  
4 14 Moher D, Liberati A, Tetzlaff J, et al. Preferred reporting items for systematic reviews and  
5  
6 meta-analyses: the PRISMA statement. *PLoS Med* 2009;**6**:e1000097.  
7  
8  
9 15 Smarr KL, Keefer AL. Measures of depression and depressive symptoms: Beck Depression  
10  
11 Inventory-II (BDI-II), Center for Epidemiologic Studies Depression Scale (CES-D),  
12  
13 Geriatric Depression Scale (GDS), Hospital Anxiety and Depression Scale (HADS), and  
14  
15 Patient Health Questionnaire-9 (PHQ-9). *Arthritis Care Res (Hoboken)* 2011;**63 Suppl**  
16  
17 **11**:S454-66.  
18  
19  
20  
21  
22 16 Wells GA, Shea B, O'Connell D, et al. The Newcastle-Ottawa Scale (NOS) for assessing  
23  
24 the quality of nonrandomised studies in meta-analyses.  
25  
26 [http://www.ohrica/programs/clinical\\_epidemiology/oxfordasp](http://www.ohrica/programs/clinical_epidemiology/oxfordasp)  
27  
28  
29  
30  
31 17 Wan X, Wang W, Liu J, et al. Estimating the sample mean and standard deviation from the  
32  
33 sample size, median, range and/or interquartile range. *BMC Med Res Methodol*  
34  
35 2014;**14**:135.  
36  
37  
38  
39 18 DerSimonian R, Laird N. Meta-analysis in clinical trials. *Control Clin Trials* 1986;**7**:177-  
40  
41 88.  
42  
43  
44  
45 19 Higgins JP, Thompson SG, Deeks JJ, et al. Measuring inconsistency in meta-analyses. *BMJ*  
46  
47 2003;**327**:557-60.  
48  
49  
50 20 Higgins JP, Thompson SG. Quantifying heterogeneity in a meta-analysis. *Stat Med*  
51  
52 2002;**21**:1539-58.  
53  
54  
55 21 Begg CB, Mazumdar M. Operating characteristics of a rank correlation test for publication  
56  
57 bias. *Biometrics* 1994;**50**:1088-101.  
58  
59  
60

- 1  
2  
3  
4 22 Egger M, Davey Smith G, Schneider M, et al. Bias in meta-analysis detected by a simple,  
5  
6 graphical test. *BMJ* 1997;**315**:629-34.  
7  
8  
9 23 Kellett SC, Gawkrödger DJ. The psychological and emotional impact of acne and the effect  
10  
11 of treatment with isotretinoin. *Br J Dermatol* 1999;**140**:273-82.  
12  
13  
14 24 Jick SS, Kremers HM, Vasilakis-Scaramozza C. Isotretinoin use and risk of depression,  
15  
16 psychotic symptoms, suicide, and attempted suicide. *Arch Dermatol* 2000;**136**:1231-6.  
17  
18  
19 25 Ng CH, Tam MM, Celi E, et al. Prospective study of depressive symptoms and quality of  
20  
21 life in acne vulgaris patients treated with isotretinoin compared to antibiotic and topical  
22  
23 therapy. *Australas J Dermatol* 2002;**43**:262-8.  
24  
25  
26 26 Ferahbas A, Turan MT, Esel E, et al. A pilot study evaluating anxiety and depressive scores  
27  
28 in acne patients treated with isotretinoin. *J Dermatolog Treat* 2004;**15**:153-7.  
29  
30  
31 27 Chia CY, Lane W, Chibnall J, et al. Isotretinoin therapy and mood changes in adolescents  
32  
33 with moderate to severe acne: a cohort study. *Arch Dermatol* 2005;**141**:557-60.  
34  
35  
36 28 Kellett SC, Gawkrödger DJ. A prospective study of the responsiveness of depression and  
37  
38 suicidal ideation in acne patients to different phases of isotretinoin therapy. *Eur J*  
39  
40 *Dermatol* 2005;**15**:484-8.  
41  
42  
43 29 Kaymak Y, Kalay M, Ilter N, et al. Incidence of depression related to isotretinoin treatment  
44  
45 in 100 acne vulgaris patients. *Psychol Rep* 2006;**99**:897-906.  
46  
47  
48 30 Cohen J, Adams S, Patten S. No association found between patients receiving isotretinoin  
49  
50 for acne and the development of depression in a Canadian prospective cohort. *Can J Clin*  
51  
52 *Pharmacol* 2007;**14**:e227-33.  
53  
54  
55  
56  
57  
58  
59  
60

- 1  
2  
3  
4 31 Azoulay L, Blais L, Koren G, et al. Isotretinoin and the risk of depression in patients with  
5  
6  
7 acne vulgaris: a case-crossover study. *J Clin Psychiatry* 2008;**69**:526-32.  
8  
9  
10 32 Bozdag KE, Gulseren S, Guven F, et al. Evaluation of depressive symptoms in acne patients  
11  
12 treated with isotretinoin. *J Dermatolog Treat* 2009;**20**:293-6.  
13  
14  
15 33 Kaymak Y, Taner E, Taner Y. Comparison of depression, anxiety and life quality in acne  
16  
17 vulgaris patients who were treated with either isotretinoin or topical agents. *Int J Dermatol*  
18  
19 2009;**48**:41-6.  
20  
21  
22  
23 34 Rehn LM, Meririnne E, Hook-Nikanne J, et al. Depressive symptoms and suicidal ideation  
24  
25 during isotretinoin treatment: a 12-week follow-up study of male Finnish military  
26  
27 conscripts. *J Eur Acad Dermatol Venereol* 2009;**23**:1294-7.  
28  
29  
30  
31 35 Simic D, Situm M, Letica E, et al. Psychological impact of isotretinoin treatment in patients  
32  
33 with moderate and severe acne. *Coll Antropol* 2009;**33 Suppl 2**:15-9.  
34  
35  
36 36 McGrath EJ, Lovell CR, Gillison F, et al. A prospective trial of the effects of isotretinoin  
37  
38 on quality of life and depressive symptoms. *Br J Dermatol* 2010;**163**:1323-9.  
39  
40  
41  
42 37 Fakour Y, Noormohammadpour P, Ameri H, et al. The effect of isotretinoin (roaccutane)  
43  
44 therapy on depression and quality of life of patients with severe acne. *Iran J Psychiatry*  
45  
46 2014;**9**:237-40.  
47  
48  
49  
50 38 Ergun T, Seekin D, Ozaydin N, et al. Isotretinoin has no negative effect on attention,  
51  
52 executive function and mood. *J Eur Acad Dermatol Venereol* 2012;**26**:431-9.  
53  
54  
55 39 Ormerod AD, Thind CK, Rice SA, et al. Influence of isotretinoin on hippocampal-based  
56  
57 learning in human subjects. *Psychopharmacology (Berl)* 2012;**221**:667-74.  
58  
59  
60

- 1  
2  
3  
4 40 Yesilova Y, Bez Y, Ari M, et al. Effects of isotretinoin on obsessive compulsive symptoms,  
5  
6 depression, and anxiety in patients with acne vulgaris. *J Dermatolog Treat* 2012;**23**:268-  
7  
8 71.  
9  
10  
11  
12 41 Marron SE, Tomas-Aragones L, Boira S. Anxiety, depression, quality of life and patient  
13  
14 satisfaction in acne patients treated with oral isotretinoin. *Acta Derm Venereol*  
15  
16 2013;**93**:701-6.  
17  
18  
19  
20 42 Gnanaraj P, Karthikeyan S, Narasimhan M, et al. Decrease in "Hamilton Rating Scale for  
21  
22 Depression" Following Isotretinoin Therapy in Acne: An Open-Label Prospective Study.  
23  
24 *Indian J Dermatol* 2015;**60**:461-4.  
25  
26  
27  
28 43 Suarez B, Serrano A, Cova Y, et al. Isotretinoin was not associated with depression or  
29  
30 anxiety: A twelve-week study. *World J Psychiatry* 2016;**6**:136-42.  
31  
32  
33  
34 44 Marqueling AL, Zane LT. Depression and suicidal behavior in acne patients treated with  
35  
36 isotretinoin: a systematic review. *Semin Cutan Med Surg* 2007;**26**:210-20.  
37  
38  
39  
40 45 Vallerand IA, Lewinson RT. Efficacy and adverse events of oral isotretinoin for acne: a  
41  
42 systematic review. 2017;  
43  
44  
45 46 Huang YC, Cheng YC. Isotretinoin treatment for acne and risk of depression: A systematic  
46  
47 review and meta-analysis. *J Am Acad Dermatol* 2017;**76**:1068-76.e9.  
48  
49  
50 47 Crandall J, Sakai Y, Zhang J, et al. 13-cis-retinoic acid suppresses hippocampal cell division  
51  
52 and hippocampal-dependent learning in mice. *Proc Natl Acad Sci U S A* 2004;**101**:5111-  
53  
54 6.  
55  
56  
57  
58 48 Bremner JD, Fani N, Ashraf A, et al. Functional brain imaging alterations in acne patients  
59  
60

- 1  
2  
3  
4 treated with isotretinoin. *Am J Psychiatry* 2005;**162**:983-91.  
5  
6  
7 49 O'Reilly KC, Trent S, Bailey SJ, et al. 13-cis-Retinoic acid alters intracellular serotonin,  
8  
9 increases 5-HT1A receptor, and serotonin reuptake transporter levels in vitro. *Exp Biol*  
10  
11  
12 *Med (Maywood)* 2007;**232**:1195-203.  
13  
14  
15 50 Misery L. Consequences of psychological distress in adolescents with acne. *J Invest*  
16  
17 *Dermatol* 2011;**131**:290-2.  
18  
19  
20 51 Aktan S, Ozmen E, Sanli B. Anxiety, depression, and nature of acne vulgaris in adolescents.  
21  
22  
23 *Int J Dermatol* 2000;**39**:354-7.  
24  
25  
26 52 Yang YC, Tu HP, Hong CH. Female gender and acne disease are jointly and independently  
27  
28 associated with the risk of major depression and suicide: a national population-based study.  
29  
30  
31 *BioMed Research International* 2014;**2014**:504279.  
32  
33  
34 53 Smithard A, Glazebrook C, Williams HC. Acne prevalence, knowledge about acne and  
35  
36 psychological morbidity in mid-adolescence: a community-based study. *Br J Dermatol*  
37  
38  
39 2001;**145**:274-9.  
40  
41  
42 54 Thiboutot D, Dreno B, Layton A. Acne counseling to improve adherence. *Cutis* 2008;**81**:81-  
43  
44  
45 6.  
46  
47  
48 55 Hansen TJ, Lucking S, Miller JJ, et al. Standardized laboratory monitoring with use of  
49  
50 isotretinoin in acne. *J Am Acad Dermatol* 2016;**75**:323-8.  
51  
52  
53  
54  
55  
56  
57  
58  
59  
60

1  
2  
3  
4  
5  
6  
7  
8  
9  
10  
11  
12  
13  
14  
15  
16  
17  
18  
19  
20  
21  
22  
23  
24  
25  
26  
27  
28  
29  
30  
31  
32  
33  
34  
35  
36  
37  
38  
39  
40  
41  
42  
43  
44  
45  
46

**Table 1.** Characteristics of included studies

| Author (year)         | Region    | Design        | Isotretinoin users | Mean/Median age (year) | Female (%) | Acne severity      | Comparison groups | Dose                | Treatment duration | Depression assessment |
|-----------------------|-----------|---------------|--------------------|------------------------|------------|--------------------|-------------------|---------------------|--------------------|-----------------------|
| Kellett et al. (1999) | UK        | Prospective   | 34                 | 24                     | 44         | NA                 | Before vs after   | 1.0 mg/(kg · d)     | 4 months           | HADS-D                |
| Pick et al. (2000) a  | Canada    | Retrospective | 7195               | <30 (75%)              | 47         | NA                 | Before vs after   | 40 mg (86%)         | 3–6 months (62%)   | ICD code              |
| Pick et al. (2000) b  | UK        | Retrospective | 340                | <30 (78%)              | 42         | NA                 | Before vs after   | 20 mg (75%)         | 1–2 months (81%)   | ICD code              |
| Ng et al. (2002)      | Australia | Prospective   | 174                | 20                     | 41         | Moderate to severe | Before vs after   | 0.8–1.0 mg/(kg · d) | 6 months           | BDI                   |

1  
2  
3  
4  
5  
6  
7  
8  
9  
10  
11  
12  
13  
14  
15  
16  
17  
18  
19  
20  
21  
22  
23  
24  
25  
26  
27  
28  
29  
30  
31  
32  
33  
34  
35  
36  
37  
38  
39  
40  
41  
42  
43  
44  
45  
46

|                        |        |               |     |       |    |                    |                   |                      |            |             |
|------------------------|--------|---------------|-----|-------|----|--------------------|-------------------|----------------------|------------|-------------|
| Ferahbas et al. (2004) | Turkey | Prospective   | 23  | 20    | 43 | Severe             | Before vs after   | 0.5–1.0 mg/(kg · d)  | 4 months   | MADRS       |
| Kellett et al. (2005)  | UK     | Prospective   | 33  | 25    | 36 | NA                 | Before vs after   | 1.0 mg/(kg · d)      | 4 months   | BDI         |
| Kaymak et al. (2006)   | Turkey | Prospective   | 24  | 100   | 58 | Moderate           | Before vs after   | 0.75–1.0 mg/(kg · d) | 5–7 months | HRS         |
| Chia et al. (2005)     | USA    | Prospective   | 59  | 12–19 | 25 | Moderate to severe | Before vs after   | 1.0 mg/(kg · d)      | 3–4 months | CES-D       |
| Azoulay et al. (2008)  | Canada | Retrospective | 126 | 28    | 53 | NA                 | Users vs nonusers | NA                   | 5 months   | ICD code    |
| Kaymak et al. (2009)   | Turkey | Prospective   | 37  | 21    | 69 | Mild to severe     | Before vs after   | 0.5–0.8 mg/(kg · d)  | > 5 months | BDI, HADS-D |



1  
2  
3  
4  
5  
6  
7  
8  
9  
10  
11  
12  
13  
14  
15  
16  
17  
18  
19  
20  
21  
22  
23  
24  
25  
26  
27  
28  
29  
30  
31  
32  
33  
34  
35  
36  
37  
38  
39  
40  
41  
42  
43  
44  
45  
46

|                       |                        |             |     |    |    |          |                           |                     |          |       |
|-----------------------|------------------------|-------------|-----|----|----|----------|---------------------------|---------------------|----------|-------|
| Bozdag et al. (2009)  | Turkey                 | Prospective | 50  | 20 | 52 | Moderate | Before vs after           | 1.0 mg/(kg · d)     | 4 months | BDI   |
|                       |                        |             |     |    |    |          | to severe                 |                     |          |       |
| Rehn et al. (2009)    | Finland                | Prospective | 126 | 20 | 0  | Moderate | Before vs after           | 0.5 mg/(kg · d)     | 3 months | BDI   |
|                       |                        |             |     |    |    |          | to severe                 |                     |          |       |
| Simic et al. (2009)   | Bosnia and Herzegovina | Prospective | 85  | 19 | 34 | Moderate | Isotretinoin vs vitamin C | 1.0 mg/(kg · d)     | 2 months | BDI   |
|                       |                        |             |     |    |    |          | to severe                 |                     |          |       |
| McGrath et al. (2010) | UK                     | Prospective | 65  | 20 | 31 | Mean     | Before vs after           | 0.5–1.0 mg/(kg · d) | 3 months | CES-D |
|                       |                        |             |     |    |    |          | AGS                       |                     |          |       |
|                       |                        |             |     |    |    |          | score 3.3                 |                     |          |       |

1  
2  
3  
4  
5  
6  
7  
8  
9  
10  
11  
12  
13  
14  
15  
16  
17  
18  
19  
20  
21  
22  
23  
24  
25  
26  
27  
28  
29  
30  
31  
32  
33  
34  
35  
36  
37  
38  
39  
40  
41  
42  
43  
44  
45  
46

|                        |        |             |     |    |    |                     |                 |                     |            |        |
|------------------------|--------|-------------|-----|----|----|---------------------|-----------------|---------------------|------------|--------|
| Ergun et al. (2012)    | Turkey | Prospective | 65  | 22 | 73 | Severe or resistant | Before vs after | 0.5–1.0 mg/(kg · d) | ≈ 5 months | HADS-D |
| Ormerod et al. (2012)  | UK     | Prospective | 16  | 22 | 25 | Severe              | Before vs after | 0.5–1.0 mg/(kg · d) | 3–6 months | BDI    |
| Yesilova et al. (2012) | Turkey | Prospective | 43  | 23 | 70 | Mild to severe      | Before vs after | 0.5–1.0 mg/(kg · d) | 6 months   | HADS-D |
| Marron et al. (2013)   | Spain  | Prospective | 346 | 21 | 59 | Moderate            | Before vs after | Total: 120 mg/kg    | 7 months   | HADS-D |
| Fakour et al. (2014)   | Iran   | Prospective | 98  | 22 | 61 | Severe              | Before vs after | 0.5 mg/(kg · d)     | 4 months   | BDI    |
| Gnanaraj et al. (2015) | India  | Prospective | 143 | 21 | 34 | Moderate to severe  | Before vs after | 0.5 mg/(kg · d)     | 3 months   | HRS    |

1  
2  
3  
4  
5  
6  
7  
8  
9  
10  
11  
12  
13  
14  
15  
16  
17  
18  
19  
20  
21  
22  
23  
24  
25  
26  
27  
28  
29  
30  
31  
32  
33  
34  
35  
36  
37  
38  
39  
40  
41  
42  
43  
44  
45  
46

|                      |           |             |    |    |    |        |                 |         |          |     |
|----------------------|-----------|-------------|----|----|----|--------|-----------------|---------|----------|-----|
| Suarez et al. (2016) | Venezuela | Prospective | 36 | 21 | 44 | Severe | Before vs after | 30 mg/d | 3 months | ZDS |
|                      |           |             |    |    |    | (25%)  |                 |         |          |     |

---

AGS, Acne grading scale; BDI, Beck Depression Inventory; CES-D, Center for Epidemiologic Studies Depression Scale; HADS-D, hospital anxiety and depression scale-depression; HRS, Hamilton Rating Scale; ICD, International Classification of Diseases; MADRS, Montgomery–Asberg depression rating scale; NA, not available; ZDS, Zung self-rating depression scale.

**Table 2.** Subgroup analysis for studies presenting depressive symptom scores after isotretinoin compared with the baseline

| Subgroups               | Number of cohorts | SMD (95% CI)           | <i>P</i> value | <i>I</i> <sup>2</sup> ( <i>P</i> value) |
|-------------------------|-------------------|------------------------|----------------|-----------------------------------------|
| <b>Region</b>           |                   |                        |                |                                         |
| Europe                  | 14                | −0.35 (−0.51 to −0.19) | <0.05          | 46.3% (<0.05)                           |
| Asia                    | 3                 | −0.18 (−0.81 to 0.45)  | 0.57           | 94.4% (<0.05)                           |
| North America           | 1                 | −0.23 (−0.59 to 0.13)  | 0.21           | –                                       |
| Africa                  | 1                 | −0.74 (−1.22 to −0.26) | <0.05          | –                                       |
| <b>Depression scale</b> |                   |                        |                |                                         |
| BDI                     | 10                | 0.10 (−0.12 to 0.32)   | 0.38           | 65.2% (<0.05)                           |
| HADS-D                  | 4                 | 0.57 (0.31–0.83)       | <0.05          | 27.2% (0.25)                            |
| CES-D                   | 2                 | 0.27 (0.02–0.52)       | <0.05          | 0% (0.78)                               |
| HRS                     | 2                 | 0.55 (−0.46 to 1.56)   | 0.29           | 96.6% (<0.05)                           |
| MADRS                   | 1                 | 0.33 (−0.25 to 0.91)   | 0.27           | –                                       |
| ZDS                     | 1                 | 0.74 (0.26–1.22)       | <0.05          | –                                       |
| <b>Sample size</b>      |                   |                        |                |                                         |

|    |                               |    |                        |       |               |
|----|-------------------------------|----|------------------------|-------|---------------|
| 1  |                               |    |                        |       |               |
| 2  |                               |    |                        |       |               |
| 3  |                               |    |                        |       |               |
| 4  | <50                           | 9  | -0.38 (-0.65 to -0.12) | <0.05 | 64.0% (<0.05) |
| 5  |                               |    |                        |       |               |
| 6  |                               |    |                        |       |               |
| 7  | ≥50                           | 11 | -0.29 (-0.54 to -0.04) | <0.05 | 83.1% (<0.05) |
| 8  |                               |    |                        |       |               |
| 9  |                               |    |                        |       |               |
| 10 |                               |    |                        |       |               |
| 11 | Percentage of female patients |    |                        |       |               |
| 12 |                               |    |                        |       |               |
| 13 |                               |    |                        |       |               |
| 14 | <50                           | 12 | -0.32 (-0.55 to -0.09) | <0.05 | 76.8% (<0.05) |
| 15 |                               |    |                        |       |               |
| 16 |                               |    |                        |       |               |
| 17 |                               |    |                        |       |               |
| 18 | ≥50                           | 8  | -0.34 (-0.04 to -0.64) | <0.05 | 78.4% (<0.05) |
| 19 |                               |    |                        |       |               |
| 20 |                               |    |                        |       |               |

BDI, Beck Depression Inventory; CES-D, Center for Epidemiologic Studies Depression

Scale; CI, confidence interval; HADS-D, hospital anxiety and depression scale-depression;

HRS, Hamilton Rating Scale; MADRS, Montgomery–Asberg depression rating scale; SMD,

standardized mean difference; ZDS, Zung self-rating depression scale.

1  
2  
3  
4 **Figure legends:**  
5

6 **Figure 1.** Study selection process.  
7

8  
9 **Figure 2.** Forest plot showing the standardized mean difference for the comparison of  
10 depression symptom scores before and after isotretinoin treatment in patients with acne.  
11  
12

13  
14 **Figure 3.** Funnel plot of studies comparing depression symptom scores before and after  
15 isotretinoin treatment in patients with acne.  
16  
17

18  
19 **Figure 4.** Forest plot showing the weighted mean difference for the comparison of BDI scores  
20 before and after isotretinoin treatment in patients with acne.  
21  
22

23  
24 **Figure 5.** Forest plot showing the association between isotretinoin treatment and depression in  
25 patients with acne.  
26  
27

28  
29 **Figure 6.** Funnel plot showing the association between isotretinoin treatment and depression  
30 in patients with acne.  
31  
32

33  
34  
35  
36  
37  
38  
39 **Legends for supporting information**  
40

41  
42 **Supplemental 1.** The details of searching strategy in PubMed.  
43

44  
45 **Supplemental 2.** Newcastle–Ottawa Scale for quality assessment of included studies  
46  
47  
48  
49  
50  
51  
52  
53  
54  
55  
56  
57  
58  
59  
60

1  
2  
3  
4  
5  
6  
7  
8  
9  
10  
11  
12  
13  
14  
15  
16  
17  
18  
19  
20  
21  
22  
23  
24  
25  
26  
27  
28  
29  
30  
31  
32  
33  
34  
35  
36  
37  
38  
39  
40  
41  
42  
43  
44  
45  
46  
47  
48  
49  
50  
51  
52  
53  
54  
55  
56  
57  
58  
59  
60

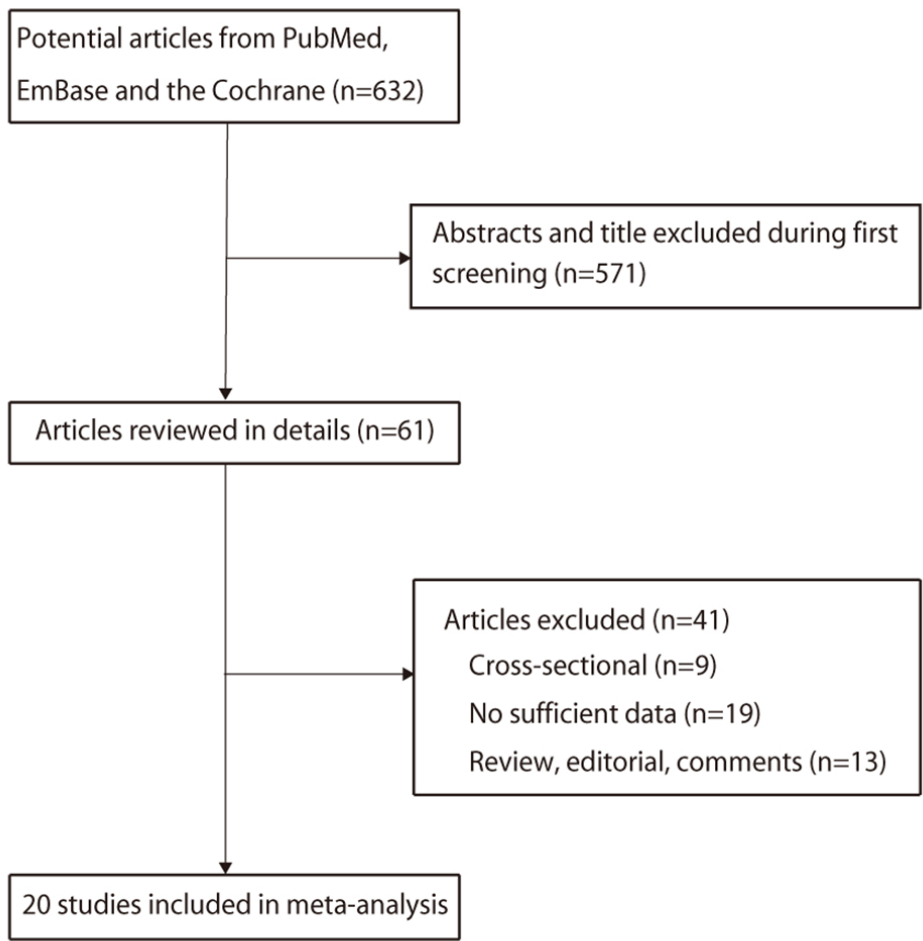

1  
2  
3  
4  
5  
6  
7  
8  
9  
10  
11  
12  
13  
14  
15  
16  
17  
18  
19  
20  
21  
22  
23  
24  
25  
26  
27  
28  
29  
30  
31  
32  
33  
34  
35  
36  
37  
38  
39  
40  
41  
42  
43  
44  
45  
46  
47  
48  
49  
50  
51  
52  
53  
54  
55  
56  
57  
58  
59  
60

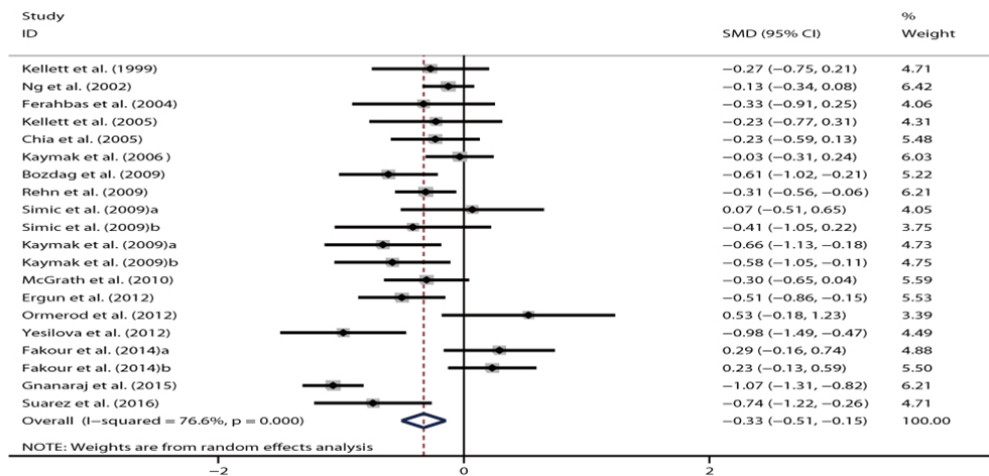



1  
2  
3  
4  
5  
6  
7  
8  
9  
10  
11  
12  
13  
14  
15  
16  
17  
18  
19  
20  
21  
22  
23  
24  
25  
26  
27  
28  
29  
30  
31  
32  
33  
34  
35  
36  
37  
38  
39  
40  
41  
42  
43  
44  
45  
46  
47  
48  
49  
50  
51  
52  
53  
54  
55  
56  
57  
58  
59  
60

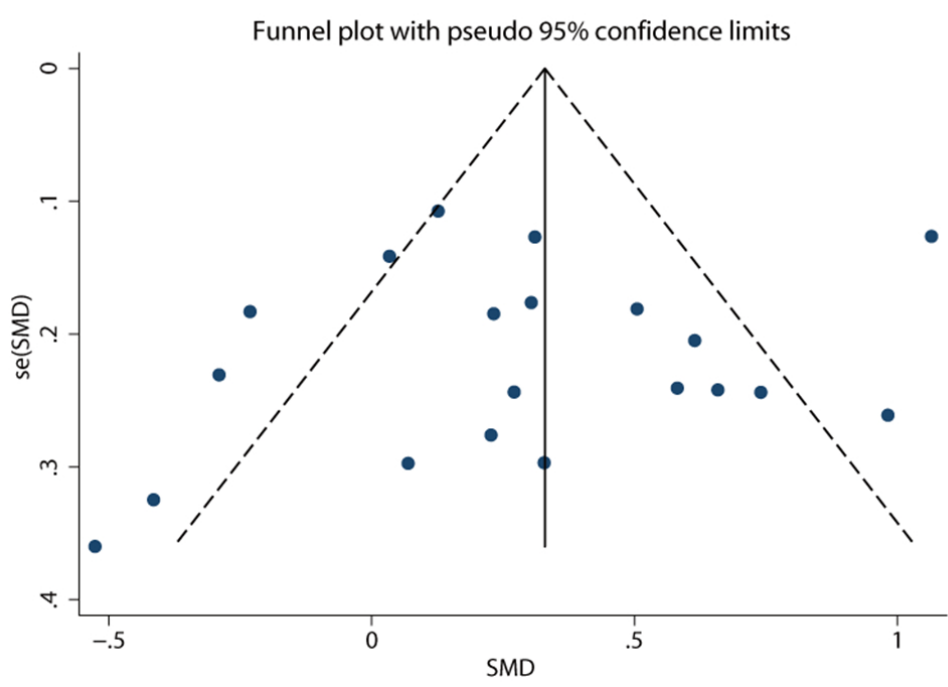

1  
2  
3  
4  
5  
6  
7  
8  
9  
10  
11  
12  
13  
14  
15  
16  
17  
18  
19  
20  
21  
22  
23  
24  
25  
26  
27  
28  
29  
30  
31  
32  
33  
34  
35  
36  
37  
38  
39  
40  
41  
42  
43  
44  
45  
46  
47  
48  
49  
50  
51  
52  
53  
54  
55  
56  
57  
58  
59  
60

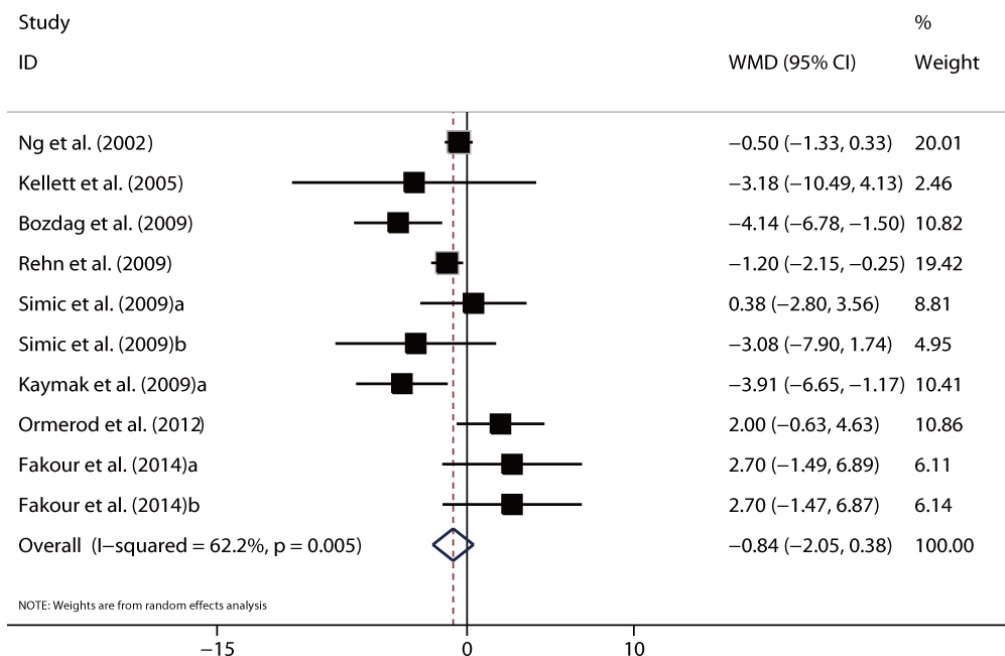

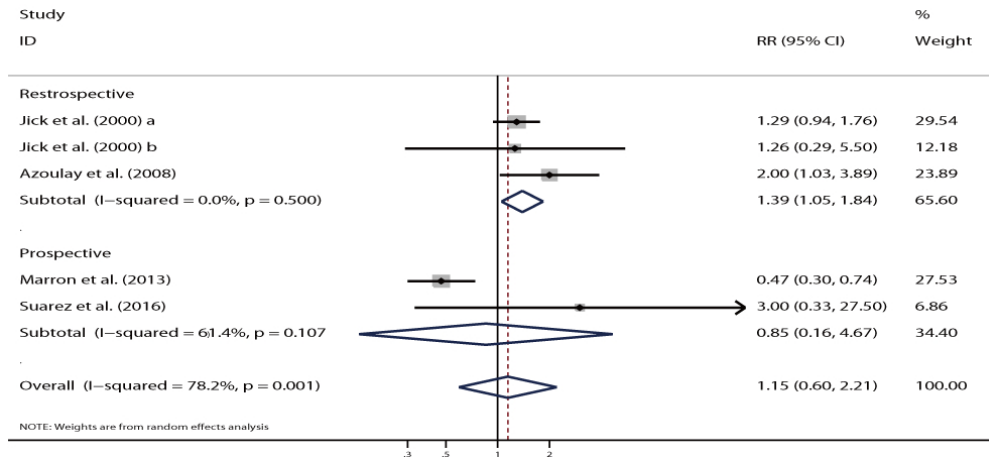

1  
2  
3  
4  
5  
6  
7  
8  
9  
10  
11  
12  
13  
14  
15  
16  
17  
18  
19  
20  
21  
22  
23  
24  
25  
26  
27  
28  
29  
30  
31  
32  
33  
34  
35  
36  
37  
38  
39  
40  
41  
42  
43  
44  
45  
46  
47  
48  
49  
50  
51  
52  
53  
54  
55  
56  
57  
58  
59  
60

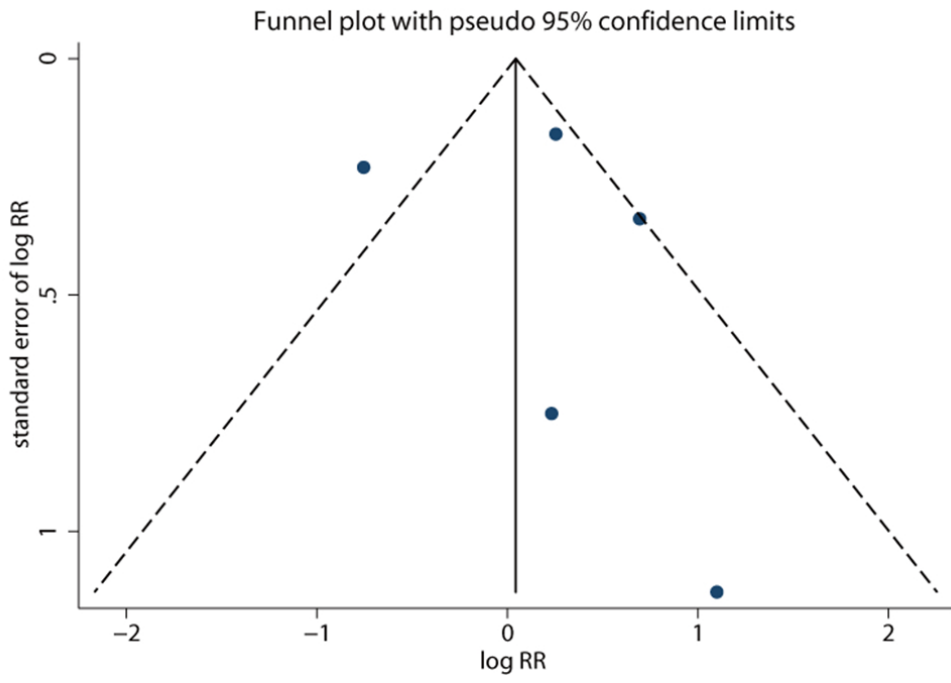

1  
2  
3  
4  
5  
6  
7  
8  
9  
10  
11  
12  
13  
14  
15  
16  
17  
18  
19  
20  
21  
22  
23  
24  
25  
26  
27  
28  
29  
30  
31  
32  
33  
34  
35  
36  
37  
38  
39  
40  
41  
42  
43  
44  
45  
46  
47  
48  
49  
50  
51  
52  
53  
54  
55  
56  
57  
58  
59  
60

**Searching strategy in PubMed:**

((("depression"[Mesh] OR "depression") OR "depressive"[Mesh] OR "depressive") AND ("acne"[Mesh] OR "acne") AND ("isotretinoin"[Mesh] OR "isotretinoin"))

For peer review only

1  
2  
3  
4 **Use of isotretinoin and risk of depression in patients with acne: a systematic**  
5  
6 **review and meta-analysis**  
7

8  
9 Changqiang Li<sup>2</sup>, Jianmei Chen<sup>1</sup>, Wo Wang<sup>3</sup>, Ming Ai<sup>1</sup>, Qi Zhang<sup>1</sup>, Li Kuang<sup>1\*</sup>  
10

11  
12 <sup>1</sup>Department of Psychiatry, the First Affiliated Hospital of Chongqing Medical  
13  
14 University, Chongqing 400016, China  
15

16  
17 <sup>2</sup>Department of Dermatology, The Affiliated Hospital of Southwest Medical  
18  
19 University, Luzhou , 646000, China  
20

21  
22 <sup>3</sup>Mental Health Center, University-Town Hospital of Chongqing Medical University,  
23  
24 Chongqing 401331, China  
25

26  
27  
28  
29  
30 \*Corresponding author:  
31

32  
33 Li Kuang  
34

35  
36 Department of Psychiatry, the First Affiliated Hospital of Chongqing Medical  
37  
38 University, Chongqing 400016, China  
39

40  
41 Tel: +86-13908379733  
42

43  
44 Fax: +86-21-64085875  
45

46  
47 Email: kuangli0308120@126.com  
48  
49  
50  
51  
52  
53  
54  
55  
56  
57  
58  
59  
60

**Supplemental Table 1.** Newcastle–Ottawa scale for quality assessment of included studies

| <b>Study</b>           | <b>Selection</b> | <b>Comparability</b> | <b>Outcome</b> |
|------------------------|------------------|----------------------|----------------|
| Kellett et al. (1999)  | ****             | *                    | ***            |
| Jick et al. (2000) a   | ****             | **                   | **             |
| Jick et al. (2000) b   | ****             | **                   | **             |
| Ng et al. (2002)       | ****             | *                    | ***            |
| Ferahbas et al. (2004) | ****             | *                    | ***            |
| Kellett et al. (2005)  | ****             | *                    | ***            |
| Kaymak et al. (2006)   | ****             | *                    | ***            |
| Chia et al. (2005)     | ***              | *                    | ***            |
| Azoulay et al. (2008)  | ****             | **                   | **             |
| Kaymak et al. (2009)   | ****             | *                    | ***            |
| Bozdag et al. (2009)   | ****             | *                    | ***            |
| Rehn et al. (2009)     | ***              | *                    | ***            |
| Simic et al. (2009)    | ****             | *                    | ***            |
| McGrath et al. (2010)  | ****             | *                    | ***            |
| Ergun et al. (2012)    | ****             | *                    | ***            |
| Ormerod et al. (2012)  | ***              | *                    | ***            |
| Yesilova et al. (2012) | ****             | *                    | ***            |
| Marron et al. (2013)   | ****             | *                    | ***            |
| Fakour et al. (2014)   | ****             | *                    | ***            |
| Gnanaraj et al. (2015) | ****             | *                    | ***            |
| Suarez et al. (2016)   | ****             | *                    | ***            |



# PRISMA 2009 Checklist

1  
2  
3  
4  
5  
6  
7  
8  
9  
10  
11  
12  
13  
14  
15  
16  
17  
18  
19  
20  
21  
22  
23  
24  
25  
26  
27  
28  
29  
30  
31  
32  
33  
34  
35  
36  
37  
38  
39  
40  
41  
42  
43  
44  
45  
46  
47

| Section/topic                      | #  | Checklist item                                                                                                                                                                                                                                                                                              | Reported on page # |
|------------------------------------|----|-------------------------------------------------------------------------------------------------------------------------------------------------------------------------------------------------------------------------------------------------------------------------------------------------------------|--------------------|
| <b>TITLE</b>                       |    |                                                                                                                                                                                                                                                                                                             |                    |
| Title                              | 1  | Identify the report as a systematic review, meta-analysis, or both.                                                                                                                                                                                                                                         | 1                  |
| <b>ABSTRACT</b>                    |    |                                                                                                                                                                                                                                                                                                             |                    |
| Structured summary                 | 2  | Provide a structured summary including, as applicable: background; objectives; data sources; study eligibility criteria, participants, and interventions; study appraisal and synthesis methods; results; limitations; conclusions and implications of key findings; systematic review registration number. | 2                  |
| <b>INTRODUCTION</b>                |    |                                                                                                                                                                                                                                                                                                             |                    |
| Rationale                          | 3  | Describe the rationale for the review in the context of what is already known.                                                                                                                                                                                                                              | 3                  |
| Objectives                         | 4  | Provide an explicit statement of questions being addressed with reference to participants, interventions, comparisons, outcomes, and study design (PICOS).                                                                                                                                                  | 3                  |
| <b>METHODS</b>                     |    |                                                                                                                                                                                                                                                                                                             |                    |
| Protocol and registration          | 5  | Indicate whether a review protocol exists, if and where it can be accessed (e.g., Web address), and, if available, provide registration information including registration number.                                                                                                                          | 4                  |
| Eligibility criteria               | 6  | Specify study characteristics (e.g., PICOS and length of follow-up) and report characteristics (e.g., years considered, language, and publication status) used as criteria for eligibility, giving rationale.                                                                                               | 4                  |
| Information sources                | 7  | Describe all information sources (e.g., databases with dates of coverage and contact with study authors to identify additional studies) in the search and date last searched.                                                                                                                               | 4                  |
| Search                             | 8  | Present full electronic search strategy for at least one database, including any limits used, such that it could be repeated.                                                                                                                                                                               | 4                  |
| Study selection                    | 9  | State the process for selecting studies (i.e., screening, eligibility, included in systematic review, and, if applicable, included in the meta-analysis).                                                                                                                                                   | 4                  |
| Data collection process            | 10 | Describe method of data extraction from reports (e.g., piloted forms, independently, in duplicate) and any processes for obtaining and confirming data from investigators.                                                                                                                                  | 4                  |
| Data items                         | 11 | List and define all variables for which data were sought (e.g., PICOS and funding sources) and any assumptions and simplifications made.                                                                                                                                                                    | 4                  |
| Risk of bias in individual studies | 12 | Describe methods used for assessing the risk of bias of individual studies (including specification of whether this was done at the study or outcome level), and how this information is to be used in any data synthesis.                                                                                  | 4                  |
| Summary measures                   | 13 | State the principal summary measures (e.g., risk ratio and difference in means).                                                                                                                                                                                                                            | 4–5                |
| Synthesis of results               | 14 | Describe the methods of handling data and combining results of studies, if done, including measures of consistency (e.g., $I^2$ ) for each meta-analysis.                                                                                                                                                   | 4–5                |





# PRISMA 2009 Checklist

Page 1 of 2

| Section/topic                 | #  | Checklist item                                                                                                                                                                                               | Reported on page # |
|-------------------------------|----|--------------------------------------------------------------------------------------------------------------------------------------------------------------------------------------------------------------|--------------------|
| Risk of bias across studies   | 15 | Specify any assessment of risk of bias that may affect the cumulative evidence (e.g., publication bias and selective reporting within studies).                                                              | 4–5                |
| Additional analyses           | 16 | Describe methods of additional analyses (e.g., sensitivity or subgroup analyses and meta-regression), if done, indicating which were pre-specified.                                                          | 5                  |
| <b>RESULTS</b>                |    |                                                                                                                                                                                                              |                    |
| Study selection               | 17 | Give numbers of studies screened, assessed for eligibility, and included in the review, with reasons for exclusions at each stage, ideally with a flow diagram.                                              | 5                  |
| Study characteristics         | 18 | For each study, present characteristics for which data were extracted (e.g., study size, PICOS, and follow-up period) and provide the citations.                                                             | 6                  |
| Risk of bias within studies   | 19 | Present data on risk of bias of each study and, if available, any outcome-level assessment (see item 12).                                                                                                    | 6                  |
| Results of individual studies | 20 | For all outcomes considered (benefits or harms), present, for each study: (a) simple summary data for each intervention group and (b) effect estimates and confidence intervals, ideally with a forest plot. | 6–7                |
| Synthesis of results          | 21 | Present results of each meta-analysis done, including confidence intervals and measures of consistency.                                                                                                      | 6–7                |
| Risk of bias across studies   | 22 | Present results of any assessment of risk of bias across studies (see Item 15).                                                                                                                              | 6–7                |
| Additional analysis           | 23 | Give results of additional analyses, if done (e.g., sensitivity or subgroup analyses and meta-regression [see Item 16]).                                                                                     | 6–7                |
| <b>DISCUSSION</b>             |    |                                                                                                                                                                                                              |                    |
| Summary of evidence           | 24 | Summarize the main findings including the strength of evidence for each main outcome; consider their relevance to key groups (e.g., health care providers, users, and policy makers).                        | 7–9                |
| Limitations                   | 25 | Discuss limitations at study and outcome levels (e.g., risk of bias), and at review level (e.g., incomplete retrieval of identified research and reporting bias).                                            | 9                  |
| Conclusions                   | 26 | Provide a general interpretation of the results in the context of other evidence, and implications for future research.                                                                                      | 9                  |
| <b>FUNDING</b>                |    |                                                                                                                                                                                                              |                    |
| Funding                       | 27 | Describe sources of funding for the systematic review and other support (e.g., supply of data); role of funders for the systematic review.                                                                   | N/A                |

From: Moher D, Liberati A, Tetzlaff J, Altman DG, The PRISMA Group (2009). Preferred Reporting Items for Systematic Reviews and Meta-Analyses: The PRISMA Statement. PLoS Med 6(6): e1000097. doi:10.1371/journal.pmed1000097

For more information, visit: [www.prisma-statement.org](http://www.prisma-statement.org).

Page 2 of 2

For peer review only - <http://bmjopen.bmj.com/site/about/guidelines.xhtml>
