# Supplementary material for: Use of isotretinoin and risk of depression in patients with acne: a systematic review and meta-analysis
Source: PubMed Central journal article supplement — BMJ Open. 2019 Jan 21;9(1):e021549. doi: 10.1136/bmjopen-2018-021549 (PMC6347928; doi:10.1136/bmjopen-2018-021549), 2019-01-21
Supplement: bmjopen-2018-021549supp001.pdf [file bmjopen-2018-021549supp001.pdf]

**Searching strategy in PubMed:**

((("depression"[Mesh] OR "depression") OR "depressive"[Mesh] OR "depressive") AND ("acne"[Mesh] OR "acne") AND ("isotretinoin"[Mesh] OR "isotretinoin"))
