# Supplementary material for: Use of isotretinoin and risk of depression in patients with acne: a systematic review and meta-analysis
Source: PubMed Central journal article supplement — BMJ Open. 2019 Jan 21;9(1):e021549. doi: 10.1136/bmjopen-2018-021549 (PMC6347928; doi:10.1136/bmjopen-2018-021549), 2019-01-21
Supplement: bmjopen-2018-021549supp002.pdf [file bmjopen-2018-021549supp002.pdf]

**Use of isotretinoin and risk of depression in patients with acne: a systematic review and meta-analysis**

Changqiang Li<sup>2</sup>, Jianmei Chen<sup>1</sup>, Wo Wang<sup>3</sup>, Ming Ai<sup>1</sup>, Qi Zhang<sup>1</sup>, Li Kuang<sup>1\*</sup>

<sup>1</sup>Department of Psychiatry, the First Affiliated Hospital of Chongqing Medical University, Chongqing 400016, China

<sup>2</sup>Department of Dermatology, The Affiliated Hospital of Southwest Medical University, Luzhou , 646000, China

<sup>3</sup>Mental Health Center, University-Town Hospital of Chongqing Medical University, Chongqing 401331, China

\*Corresponding author:

Li Kuang

Department of Psychiatry, the First Affiliated Hospital of Chongqing Medical University, Chongqing 400016, China

Tel: +86-13908379733

Fax: +86-21-64085875

Email: kuangli0308120@126.com

**Supplemental Table 1.** Newcastle–Ottawa scale for quality assessment of included studies

| <b>Study</b>           | <b>Selection</b> | <b>Comparability</b> | <b>Outcome</b> |
|------------------------|------------------|----------------------|----------------|
| Kellett et al. (1999)  | ****             | *                    | ***            |
| Jick et al. (2000) a   | ****             | **                   | **             |
| Jick et al. (2000) b   | ****             | **                   | **             |
| Ng et al. (2002)       | ****             | *                    | ***            |
| Ferahbas et al. (2004) | ****             | *                    | ***            |
| Kellett et al. (2005)  | ****             | *                    | ***            |
| Kaymak et al. (2006)   | ****             | *                    | ***            |
| Chia et al. (2005)     | ***              | *                    | ***            |
| Azoulay et al. (2008)  | ****             | **                   | **             |
| Kaymak et al. (2009)   | ****             | *                    | ***            |
| Bozdog et al. (2009)   | ****             | *                    | ***            |
| Rehn et al. (2009)     | ***              | *                    | ***            |
| Simic et al. (2009)    | ****             | *                    | ***            |
| McGrath et al. (2010)  | ****             | *                    | ***            |
| Ergun et al. (2012)    | ****             | *                    | ***            |
| Ormerod et al. (2012)  | ***              | *                    | ***            |
| Yesilova et al. (2012) | ****             | *                    | ***            |
| Marron et al. (2013)   | ****             | *                    | ***            |
| Fakour et al. (2014)   | ****             | *                    | ***            |
| Gnanaraj et al. (2015) | ****             | *                    | ***            |
| Suarez et al. (2016)   | ****             | *                    | ***            |
